# Supplementary material for: Strategies for meiotic sex chromosome dynamics and telomeric elongation in Marsupials
Source: PLoS Genet. 2022 Feb 7;18(2):e1010040. doi: 10.1371/journal.pgen.1010040 (PMC8853506; doi:10.1371/journal.pgen.1010040)
Supplement: S1 Data — (XLSX) [file pgen.1010040.s008.xlsx]

## Sheet: Fig 2C
Data from Fig 2C: Different sex chromosomes configurations for primary spermatocytes in the three marsupials included in the study
		Tammar wallaby				Fat-tailed dunnart				Fat-tailed mouse opossum
		Zygotene	Early pachytene	Mid pachytene	Late pachytene	Zygotene	Early pachytene	Mid pachytene	Late pachytene	Zygotene	Early pachytene	Mid pachytene	Late pachytene
Separated		39	17	2	0	21	18	6	0	22	20	7	0
Associated		2	2	6	0	1	1	0	0	1	2	62	0
X ring		0	0	17	0	0	0	7	0	0	0	6	0
DP	Early DP	0	0	24	0	0	0	6	28	0	0	86	168
	Late DP	0	0	0	81

## Sheet: Fig 3B
Data from Fig 3B: Transcription dynamics during prophase I in the tammar wallaby. Number of cells with different transcriptional patterns and different X chromosome conformations.
			X conformation
			Separated	Associated	X ring	Early DP	Late DP
Transcriptional pattern	Zygotene	No signal	11	0	0	0	0
		Autosomes	4	0	0	0	0
	N=41	Autosomes + X	24	2	0	0	0
	Early pachytene	No signal	2	0	0	0	0
		Autosomes	5	0	0	0	0
	N=19	Autosomes + X	10	2	0	0	0
	Mid pachytene	No signal	0	1	1	0	0
		Autosomes	1	0	0	6	0
	N=49	Autosomes + X	1	5	16	18	0
	Late pachytene	No signal	0	0	0	0	3
		Autosomes	0	0	0	0	58
	N=81	Autosomes + X	0	0	0	0	20
	% cells with X chromosome transcription:		0.603448	0.9	0.941176	0.75	0.246914

## Sheet: Fig 3C
Data from Fig 3C: RNApol II signal along X chromosome in the tammar wallaby
	Relative distance from centromere (%)	Frecuency
p-arm	100	2
	90	6
	80	11
	70	14
	60	12
	50	7
	40	5
	30	3
	20	2
	10	1
	0	0
q-arm	10	7
	20	15
	30	17
	40	13
	50	8
	60	8
	70	12
	80	13
	90	20
	100	16

## Sheet: Fig 4A v
Data from Fig 4A v: Telomeric signals per cell in the fat-tailed dunnart durint the meiotic prophase I
Cell type	Telomeric signals / cell	% telomeric signals / cell
Zygotene	2	0.125
Zygotene	3	0.1875
Zygotene	14	0.875
Zygotene	4	0.25
Zygotene	5	0.3125
Zygotene	7	0.4375
Zygotene	0	0
Zygotene	2	0.125
Zygotene	0	0
Zygotene	0	0
Zygotene	5	0.3125
Early pachytene	0	0
Early pachytene	0	0
Early pachytene	0	0
Early pachytene	2	0.125
Early pachytene	7	0.4375
Early pachytene	9	0.5625
Early pachytene	6	0.375
Early pachytene	0	0
Early pachytene	15	0.9375
Early pachytene	16	1
Early pachytene	7	0.4375
Early pachytene	8	0.5
Early pachytene	15	0.9375
Early pachytene	9	0.5625
Early pachytene	10	0.625
Early pachytene	9	0.5625
Early pachytene	1	0.0625
Early pachytene	2	0.125
Early pachytene	2	0.125
Early pachytene	0	0
Early pachytene	9	0.5625
Early pachytene	3	0.1875
Early pachytene	0	0
Early pachytene	7	0.4375
Early pachytene	0	0
Early pachytene	0	0
Early pachytene	1	0.0625
Early pachytene	1	0.0625
Late pachytene	0	0
Late pachytene	2	0.125
Late pachytene	0	0
Late pachytene	0	0
Late pachytene	0	0
Late pachytene	0	0
Late pachytene	1	0.0625
Late pachytene	0	0
Late pachytene	0	0
Late pachytene	0	0
Late pachytene	0	0
Late pachytene	0	0
Late pachytene	0	0
Late pachytene	0	0
Late pachytene	0	0
Late pachytene	7	0.4375
Late pachytene	1	0.0625
Late pachytene	1	0.0625
Late pachytene	0	0
Late pachytene	0	0
Late pachytene	3	0.1875
Late pachytene	0	0
Late pachytene	2	0.125
Late pachytene	0	0
Late pachytene	2	0.125
Late pachytene	0	0
Late pachytene	0	0
Late pachytene	0	0

## Sheet: Fig 6D
Data from Fig 6D: RPA foci per cell in the three marsupials included in the study during the meiotic prophase I
Cell type	Foci / cell	Specie	Protein
Early zygotene	150	Tammar wallaby	RPA
Early zygotene	131	Tammar wallaby	RPA
Early zygotene	133	Tammar wallaby	RPA
Early zygotene	171	Tammar wallaby	RPA
Early zygotene	142	Tammar wallaby	RPA
Early zygotene	138	Tammar wallaby	RPA
Early zygotene	156	Tammar wallaby	RPA
Early zygotene	129	Tammar wallaby	RPA
Early zygotene	126	Tammar wallaby	RPA
Early zygotene	122	Tammar wallaby	RPA
Early zygotene	151	Tammar wallaby	RPA
Early zygotene	141	Tammar wallaby	RPA
Early zygotene	180	Tammar wallaby	RPA
Early zygotene	122	Tammar wallaby	RPA
Early zygotene	139	Tammar wallaby	RPA
Early zygotene	149	Tammar wallaby	RPA
Early zygotene	103	Tammar wallaby	RPA
Early zygotene	129	Tammar wallaby	RPA
Early zygotene	161	Tammar wallaby	RPA
Early zygotene	106	Tammar wallaby	RPA
Early zygotene	117	Tammar wallaby	RPA
Late zygotene	138	Tammar wallaby	RPA
Late zygotene	118	Tammar wallaby	RPA
Late zygotene	133	Tammar wallaby	RPA
Late zygotene	108	Tammar wallaby	RPA
Late zygotene	132	Tammar wallaby	RPA
Late zygotene	133	Tammar wallaby	RPA
Late zygotene	145	Tammar wallaby	RPA
Late zygotene	109	Tammar wallaby	RPA
Late zygotene	139	Tammar wallaby	RPA
Late zygotene	158	Tammar wallaby	RPA
Late zygotene	85	Tammar wallaby	RPA
Late zygotene	127	Tammar wallaby	RPA
Late zygotene	121	Tammar wallaby	RPA
Late zygotene	123	Tammar wallaby	RPA
Late zygotene	116	Tammar wallaby	RPA
Late zygotene	100	Tammar wallaby	RPA
Late zygotene	112	Tammar wallaby	RPA
Late zygotene	95	Tammar wallaby	RPA
Late zygotene	93	Tammar wallaby	RPA
Late zygotene	82	Tammar wallaby	RPA
Late zygotene	129	Tammar wallaby	RPA
Late zygotene	123	Tammar wallaby	RPA
Late zygotene	112	Tammar wallaby	RPA
Late zygotene	90	Tammar wallaby	RPA
Late zygotene	102	Tammar wallaby	RPA
Late zygotene	94	Tammar wallaby	RPA
Early pachytene	54	Tammar wallaby	RPA
Early pachytene	78	Tammar wallaby	RPA
Early pachytene	120	Tammar wallaby	RPA
Early pachytene	73	Tammar wallaby	RPA
Early pachytene	58	Tammar wallaby	RPA
Early pachytene	75	Tammar wallaby	RPA
Early pachytene	42	Tammar wallaby	RPA
Early pachytene	60	Tammar wallaby	RPA
Early pachytene	30	Tammar wallaby	RPA
Early pachytene	22	Tammar wallaby	RPA
Early pachytene	30	Tammar wallaby	RPA
Early pachytene	42	Tammar wallaby	RPA
Early pachytene	48	Tammar wallaby	RPA
Early pachytene	34	Tammar wallaby	RPA
Early pachytene	33	Tammar wallaby	RPA
Early pachytene	51	Tammar wallaby	RPA
Early pachytene	65	Tammar wallaby	RPA
Early pachytene	49	Tammar wallaby	RPA
Early pachytene	29	Tammar wallaby	RPA
Early pachytene	57	Tammar wallaby	RPA
Late pachytene	11	Tammar wallaby	RPA
Late pachytene	1	Tammar wallaby	RPA
Late pachytene	0	Tammar wallaby	RPA
Late pachytene	3	Tammar wallaby	RPA
Late pachytene	1	Tammar wallaby	RPA
Late pachytene	8	Tammar wallaby	RPA
Late pachytene	1	Tammar wallaby	RPA
Late pachytene	4	Tammar wallaby	RPA
Late pachytene	0	Tammar wallaby	RPA
Late pachytene	5	Tammar wallaby	RPA
Late pachytene	1	Tammar wallaby	RPA
Late pachytene	1	Tammar wallaby	RPA
Late pachytene	5	Tammar wallaby	RPA
Late pachytene	3	Tammar wallaby	RPA
Late pachytene	1	Tammar wallaby	RPA
Late pachytene	2	Tammar wallaby	RPA
Late pachytene	0	Tammar wallaby	RPA
Late pachytene	13	Tammar wallaby	RPA
Late pachytene	9	Tammar wallaby	RPA
Late pachytene	17	Tammar wallaby	RPA
Late pachytene	4	Tammar wallaby	RPA
Early zygotene	151	Fat-tailed dunnart	RPA
Early zygotene	143	Fat-tailed dunnart	RPA
Early zygotene	190	Fat-tailed dunnart	RPA
Early zygotene	204	Fat-tailed dunnart	RPA
Early zygotene	156	Fat-tailed dunnart	RPA
Early zygotene	123	Fat-tailed dunnart	RPA
Early zygotene	122	Fat-tailed dunnart	RPA
Early zygotene	148	Fat-tailed dunnart	RPA
Early zygotene	145	Fat-tailed dunnart	RPA
Early zygotene	95	Fat-tailed dunnart	RPA
Early zygotene	128	Fat-tailed dunnart	RPA
Early zygotene	190	Fat-tailed dunnart	RPA
Early zygotene	139	Fat-tailed dunnart	RPA
Early zygotene	152	Fat-tailed dunnart	RPA
Early zygotene	145	Fat-tailed dunnart	RPA
Early zygotene	126	Fat-tailed dunnart	RPA
Early zygotene	103	Fat-tailed dunnart	RPA
Early zygotene	128	Fat-tailed dunnart	RPA
Early zygotene	170	Fat-tailed dunnart	RPA
Early zygotene	168	Fat-tailed dunnart	RPA
Late zygotene	116	Fat-tailed dunnart	RPA
Late zygotene	141	Fat-tailed dunnart	RPA
Late zygotene	104	Fat-tailed dunnart	RPA
Late zygotene	207	Fat-tailed dunnart	RPA
Late zygotene	128	Fat-tailed dunnart	RPA
Late zygotene	87	Fat-tailed dunnart	RPA
Late zygotene	130	Fat-tailed dunnart	RPA
Late zygotene	111	Fat-tailed dunnart	RPA
Late zygotene	162	Fat-tailed dunnart	RPA
Late zygotene	158	Fat-tailed dunnart	RPA
Late zygotene	96	Fat-tailed dunnart	RPA
Late zygotene	128	Fat-tailed dunnart	RPA
Late zygotene	82	Fat-tailed dunnart	RPA
Late zygotene	77	Fat-tailed dunnart	RPA
Late zygotene	167	Fat-tailed dunnart	RPA
Late zygotene	105	Fat-tailed dunnart	RPA
Late zygotene	96	Fat-tailed dunnart	RPA
Late zygotene	73	Fat-tailed dunnart	RPA
Late zygotene	72	Fat-tailed dunnart	RPA
Late zygotene	90	Fat-tailed dunnart	RPA
Early pachytene	85	Fat-tailed dunnart	RPA
Early pachytene	81	Fat-tailed dunnart	RPA
Early pachytene	34	Fat-tailed dunnart	RPA
Early pachytene	49	Fat-tailed dunnart	RPA
Early pachytene	95	Fat-tailed dunnart	RPA
Early pachytene	72	Fat-tailed dunnart	RPA
Early pachytene	69	Fat-tailed dunnart	RPA
Early pachytene	70	Fat-tailed dunnart	RPA
Early pachytene	123	Fat-tailed dunnart	RPA
Early pachytene	68	Fat-tailed dunnart	RPA
Early pachytene	89	Fat-tailed dunnart	RPA
Early pachytene	101	Fat-tailed dunnart	RPA
Early pachytene	97	Fat-tailed dunnart	RPA
Early pachytene	99	Fat-tailed dunnart	RPA
Early pachytene	107	Fat-tailed dunnart	RPA
Early pachytene	89	Fat-tailed dunnart	RPA
Early pachytene	57	Fat-tailed dunnart	RPA
Early pachytene	106	Fat-tailed dunnart	RPA
Early pachytene	6	Fat-tailed dunnart	RPA
Early pachytene	86	Fat-tailed dunnart	RPA
Early pachytene	95	Fat-tailed dunnart	RPA
Late pachytene	0	Fat-tailed dunnart	RPA
Late pachytene	2	Fat-tailed dunnart	RPA
Late pachytene	4	Fat-tailed dunnart	RPA
Late pachytene	0	Fat-tailed dunnart	RPA
Late pachytene	1	Fat-tailed dunnart	RPA
Late pachytene	0	Fat-tailed dunnart	RPA
Late pachytene	0	Fat-tailed dunnart	RPA
Late pachytene	2	Fat-tailed dunnart	RPA
Late pachytene	10	Fat-tailed dunnart	RPA
Late pachytene	3	Fat-tailed dunnart	RPA
Late pachytene	5	Fat-tailed dunnart	RPA
Late pachytene	7	Fat-tailed dunnart	RPA
Late pachytene	0	Fat-tailed dunnart	RPA
Late pachytene	2	Fat-tailed dunnart	RPA
Late pachytene	7	Fat-tailed dunnart	RPA
Late pachytene	0	Fat-tailed dunnart	RPA
Late pachytene	2	Fat-tailed dunnart	RPA
Late pachytene	2	Fat-tailed dunnart	RPA
Late pachytene	0	Fat-tailed dunnart	RPA
Late pachytene	0	Fat-tailed dunnart	RPA
Late pachytene	0	Fat-tailed dunnart	RPA
Late pachytene	0	Fat-tailed dunnart	RPA
Late pachytene	1	Fat-tailed dunnart	RPA
Late pachytene	1	Fat-tailed dunnart	RPA
Late pachytene	0	Fat-tailed dunnart	RPA
Late pachytene	0	Fat-tailed dunnart	RPA
Late pachytene	0	Fat-tailed dunnart	RPA
Late pachytene	0	Fat-tailed dunnart	RPA
Late pachytene	0	Fat-tailed dunnart	RPA
Late pachytene	2	Fat-tailed dunnart	RPA
Early zygotene	72	Fat-tailed mouse opossum	RPA
Early zygotene	101	Fat-tailed mouse opossum	RPA
Early zygotene	143	Fat-tailed mouse opossum	RPA
Early zygotene	130	Fat-tailed mouse opossum	RPA
Early zygotene	87	Fat-tailed mouse opossum	RPA
Early zygotene	53	Fat-tailed mouse opossum	RPA
Early zygotene	110	Fat-tailed mouse opossum	RPA
Early zygotene	127	Fat-tailed mouse opossum	RPA
Early zygotene	76	Fat-tailed mouse opossum	RPA
Early zygotene	136	Fat-tailed mouse opossum	RPA
Early zygotene	143	Fat-tailed mouse opossum	RPA
Early zygotene	134	Fat-tailed mouse opossum	RPA
Early zygotene	161	Fat-tailed mouse opossum	RPA
Early zygotene	130	Fat-tailed mouse opossum	RPA
Early zygotene	121	Fat-tailed mouse opossum	RPA
Early zygotene	131	Fat-tailed mouse opossum	RPA
Early zygotene	115	Fat-tailed mouse opossum	RPA
Early zygotene	114	Fat-tailed mouse opossum	RPA
Early zygotene	103	Fat-tailed mouse opossum	RPA
Early zygotene	194	Fat-tailed mouse opossum	RPA
Late zygotene	180	Fat-tailed mouse opossum	RPA
Late zygotene	172	Fat-tailed mouse opossum	RPA
Late zygotene	141	Fat-tailed mouse opossum	RPA
Late zygotene	198	Fat-tailed mouse opossum	RPA
Late zygotene	187	Fat-tailed mouse opossum	RPA
Late zygotene	190	Fat-tailed mouse opossum	RPA
Late zygotene	163	Fat-tailed mouse opossum	RPA
Late zygotene	170	Fat-tailed mouse opossum	RPA
Late zygotene	168	Fat-tailed mouse opossum	RPA
Late zygotene	170	Fat-tailed mouse opossum	RPA
Late zygotene	174	Fat-tailed mouse opossum	RPA
Late zygotene	142	Fat-tailed mouse opossum	RPA
Late zygotene	142	Fat-tailed mouse opossum	RPA
Late zygotene	125	Fat-tailed mouse opossum	RPA
Late zygotene	158	Fat-tailed mouse opossum	RPA
Late zygotene	134	Fat-tailed mouse opossum	RPA
Late zygotene	141	Fat-tailed mouse opossum	RPA
Late zygotene	116	Fat-tailed mouse opossum	RPA
Late zygotene	142	Fat-tailed mouse opossum	RPA
Late zygotene	134	Fat-tailed mouse opossum	RPA
Late zygotene	156	Fat-tailed mouse opossum	RPA
Late zygotene	196	Fat-tailed mouse opossum	RPA
Late zygotene	170	Fat-tailed mouse opossum	RPA
Late zygotene	123	Fat-tailed mouse opossum	RPA
Late zygotene	147	Fat-tailed mouse opossum	RPA
Late zygotene	146	Fat-tailed mouse opossum	RPA
Late zygotene	147	Fat-tailed mouse opossum	RPA
Early pachytene	140	Fat-tailed mouse opossum	RPA
Early pachytene	154	Fat-tailed mouse opossum	RPA
Early pachytene	106	Fat-tailed mouse opossum	RPA
Early pachytene	143	Fat-tailed mouse opossum	RPA
Early pachytene	127	Fat-tailed mouse opossum	RPA
Early pachytene	123	Fat-tailed mouse opossum	RPA
Early pachytene	65	Fat-tailed mouse opossum	RPA
Early pachytene	118	Fat-tailed mouse opossum	RPA
Early pachytene	131	Fat-tailed mouse opossum	RPA
Early pachytene	101	Fat-tailed mouse opossum	RPA
Early pachytene	147	Fat-tailed mouse opossum	RPA
Early pachytene	136	Fat-tailed mouse opossum	RPA
Early pachytene	98	Fat-tailed mouse opossum	RPA
Early pachytene	150	Fat-tailed mouse opossum	RPA
Early pachytene	105	Fat-tailed mouse opossum	RPA
Early pachytene	91	Fat-tailed mouse opossum	RPA
Early pachytene	118	Fat-tailed mouse opossum	RPA
Early pachytene	114	Fat-tailed mouse opossum	RPA
Early pachytene	69	Fat-tailed mouse opossum	RPA
Early pachytene	160	Fat-tailed mouse opossum	RPA
Late pachytene	0	Fat-tailed mouse opossum	RPA
Late pachytene	0	Fat-tailed mouse opossum	RPA
Late pachytene	0	Fat-tailed mouse opossum	RPA
Late pachytene	0	Fat-tailed mouse opossum	RPA
Late pachytene	0	Fat-tailed mouse opossum	RPA
Late pachytene	2	Fat-tailed mouse opossum	RPA
Late pachytene	0	Fat-tailed mouse opossum	RPA
Late pachytene	0	Fat-tailed mouse opossum	RPA
Late pachytene	0	Fat-tailed mouse opossum	RPA
Late pachytene	0	Fat-tailed mouse opossum	RPA
Late pachytene	0	Fat-tailed mouse opossum	RPA
Late pachytene	0	Fat-tailed mouse opossum	RPA
Late pachytene	0	Fat-tailed mouse opossum	RPA
Late pachytene	0	Fat-tailed mouse opossum	RPA
Late pachytene	0	Fat-tailed mouse opossum	RPA

## Sheet: Fig 6E
Data from Fig 6E: RAD51 foci per cell in the three marsupials included in the study during the meiotic prophase I
Cell type	Foci / cell	Specie	Protein
Early zygotene	106	Tammar wallaby	RAD51
Early zygotene	76	Tammar wallaby	RAD51
Early zygotene	92	Tammar wallaby	RAD51
Early zygotene	97	Tammar wallaby	RAD51
Early zygotene	116	Tammar wallaby	RAD51
Early zygotene	106	Tammar wallaby	RAD51
Early zygotene	98	Tammar wallaby	RAD51
Early zygotene	112	Tammar wallaby	RAD51
Early zygotene	116	Tammar wallaby	RAD51
Early zygotene	108	Tammar wallaby	RAD51
Early zygotene	113	Tammar wallaby	RAD51
Early zygotene	79	Tammar wallaby	RAD51
Early zygotene	83	Tammar wallaby	RAD51
Early zygotene	60	Tammar wallaby	RAD51
Early zygotene	77	Tammar wallaby	RAD51
Early zygotene	109	Tammar wallaby	RAD51
Early zygotene	136	Tammar wallaby	RAD51
Early zygotene	54	Tammar wallaby	RAD51
Early zygotene	58	Tammar wallaby	RAD51
Early zygotene	62	Tammar wallaby	RAD51
Early zygotene	72	Tammar wallaby	RAD51
Early zygotene	116	Tammar wallaby	RAD51
Late zygotene	68	Tammar wallaby	RAD51
Late zygotene	55	Tammar wallaby	RAD51
Late zygotene	40	Tammar wallaby	RAD51
Late zygotene	57	Tammar wallaby	RAD51
Late zygotene	44	Tammar wallaby	RAD51
Late zygotene	42	Tammar wallaby	RAD51
Late zygotene	42	Tammar wallaby	RAD51
Late zygotene	45	Tammar wallaby	RAD51
Late zygotene	61	Tammar wallaby	RAD51
Late zygotene	77	Tammar wallaby	RAD51
Late zygotene	71	Tammar wallaby	RAD51
Late zygotene	62	Tammar wallaby	RAD51
Late zygotene	73	Tammar wallaby	RAD51
Late zygotene	37	Tammar wallaby	RAD51
Late zygotene	61	Tammar wallaby	RAD51
Late zygotene	42	Tammar wallaby	RAD51
Late zygotene	43	Tammar wallaby	RAD51
Late zygotene	50	Tammar wallaby	RAD51
Late zygotene	39	Tammar wallaby	RAD51
Late zygotene	30	Tammar wallaby	RAD51
Late zygotene	54	Tammar wallaby	RAD51
Late zygotene	77	Tammar wallaby	RAD51
Late zygotene	51	Tammar wallaby	RAD51
Late zygotene	35	Tammar wallaby	RAD51
Late zygotene	41	Tammar wallaby	RAD51
Late zygotene	77	Tammar wallaby	RAD51
Late zygotene	54	Tammar wallaby	RAD51
Late zygotene	49	Tammar wallaby	RAD51
Late zygotene	61	Tammar wallaby	RAD51
Late zygotene	66	Tammar wallaby	RAD51
Late zygotene	47	Tammar wallaby	RAD51
Late zygotene	65	Tammar wallaby	RAD51
Late zygotene	67	Tammar wallaby	RAD51
Late zygotene	54	Tammar wallaby	RAD51
Late zygotene	50	Tammar wallaby	RAD51
Late zygotene	54	Tammar wallaby	RAD51
Late zygotene	30	Tammar wallaby	RAD51
Late zygotene	35	Tammar wallaby	RAD51
Late zygotene	40	Tammar wallaby	RAD51
Early pachytene	10	Tammar wallaby	RAD51
Early pachytene	38	Tammar wallaby	RAD51
Early pachytene	33	Tammar wallaby	RAD51
Early pachytene	22	Tammar wallaby	RAD51
Early pachytene	21	Tammar wallaby	RAD51
Early pachytene	29	Tammar wallaby	RAD51
Early pachytene	22	Tammar wallaby	RAD51
Early pachytene	33	Tammar wallaby	RAD51
Early pachytene	37	Tammar wallaby	RAD51
Early pachytene	36	Tammar wallaby	RAD51
Early pachytene	34	Tammar wallaby	RAD51
Early pachytene	44	Tammar wallaby	RAD51
Early pachytene	41	Tammar wallaby	RAD51
Early pachytene	45	Tammar wallaby	RAD51
Early pachytene	39	Tammar wallaby	RAD51
Early pachytene	33	Tammar wallaby	RAD51
Early pachytene	35	Tammar wallaby	RAD51
Early pachytene	45	Tammar wallaby	RAD51
Early pachytene	31	Tammar wallaby	RAD51
Early pachytene	39	Tammar wallaby	RAD51
Early pachytene	26	Tammar wallaby	RAD51
Early pachytene	19	Tammar wallaby	RAD51
Early pachytene	13	Tammar wallaby	RAD51
Early pachytene	23	Tammar wallaby	RAD51
Early pachytene	36	Tammar wallaby	RAD51
Late pachytene	3	Tammar wallaby	RAD51
Late pachytene	2	Tammar wallaby	RAD51
Late pachytene	20	Tammar wallaby	RAD51
Late pachytene	0	Tammar wallaby	RAD51
Late pachytene	2	Tammar wallaby	RAD51
Late pachytene	3	Tammar wallaby	RAD51
Late pachytene	2	Tammar wallaby	RAD51
Late pachytene	0	Tammar wallaby	RAD51
Late pachytene	6	Tammar wallaby	RAD51
Late pachytene	0	Tammar wallaby	RAD51
Late pachytene	2	Tammar wallaby	RAD51
Late pachytene	2	Tammar wallaby	RAD51
Late pachytene	5	Tammar wallaby	RAD51
Late pachytene	0	Tammar wallaby	RAD51
Late pachytene	0	Tammar wallaby	RAD51
Late pachytene	1	Tammar wallaby	RAD51
Late pachytene	0	Tammar wallaby	RAD51
Late pachytene	5	Tammar wallaby	RAD51
Late pachytene	0	Tammar wallaby	RAD51
Late pachytene	0	Tammar wallaby	RAD51
Late pachytene	0	Tammar wallaby	RAD51
Late pachytene	1	Tammar wallaby	RAD51
Late pachytene	2	Tammar wallaby	RAD51
Late pachytene	2	Tammar wallaby	RAD51
Late pachytene	3	Tammar wallaby	RAD51
Late pachytene	4	Tammar wallaby	RAD51
Late pachytene	16	Tammar wallaby	RAD51
Late pachytene	4	Tammar wallaby	RAD51
Late pachytene	4	Tammar wallaby	RAD51
Late pachytene	3	Tammar wallaby	RAD51
Late pachytene	5	Tammar wallaby	RAD51
Late pachytene	9	Tammar wallaby	RAD51
Late pachytene	0	Tammar wallaby	RAD51
Early zygotene	80	Fat-tailed dunnart	RAD51
Early zygotene	77	Fat-tailed dunnart	RAD51
Early zygotene	133	Fat-tailed dunnart	RAD51
Early zygotene	72	Fat-tailed dunnart	RAD51
Early zygotene	115	Fat-tailed dunnart	RAD51
Early zygotene	64	Fat-tailed dunnart	RAD51
Early zygotene	122	Fat-tailed dunnart	RAD51
Early zygotene	63	Fat-tailed dunnart	RAD51
Early zygotene	82	Fat-tailed dunnart	RAD51
Early zygotene	113	Fat-tailed dunnart	RAD51
Early zygotene	114	Fat-tailed dunnart	RAD51
Early zygotene	70	Fat-tailed dunnart	RAD51
Early zygotene	101	Fat-tailed dunnart	RAD51
Early zygotene	78	Fat-tailed dunnart	RAD51
Early zygotene	64	Fat-tailed dunnart	RAD51
Early zygotene	68	Fat-tailed dunnart	RAD51
Early zygotene	96	Fat-tailed dunnart	RAD51
Early zygotene	89	Fat-tailed dunnart	RAD51
Early zygotene	116	Fat-tailed dunnart	RAD51
Early zygotene	100	Fat-tailed dunnart	RAD51
Late zygotene	91	Fat-tailed dunnart	RAD51
Late zygotene	68	Fat-tailed dunnart	RAD51
Late zygotene	63	Fat-tailed dunnart	RAD51
Late zygotene	44	Fat-tailed dunnart	RAD51
Late zygotene	34	Fat-tailed dunnart	RAD51
Late zygotene	49	Fat-tailed dunnart	RAD51
Late zygotene	43	Fat-tailed dunnart	RAD51
Late zygotene	20	Fat-tailed dunnart	RAD51
Late zygotene	35	Fat-tailed dunnart	RAD51
Late zygotene	65	Fat-tailed dunnart	RAD51
Late zygotene	42	Fat-tailed dunnart	RAD51
Late zygotene	53	Fat-tailed dunnart	RAD51
Late zygotene	73	Fat-tailed dunnart	RAD51
Late zygotene	62	Fat-tailed dunnart	RAD51
Late zygotene	47	Fat-tailed dunnart	RAD51
Late zygotene	48	Fat-tailed dunnart	RAD51
Late zygotene	47	Fat-tailed dunnart	RAD51
Late zygotene	33	Fat-tailed dunnart	RAD51
Late zygotene	66	Fat-tailed dunnart	RAD51
Late zygotene	62	Fat-tailed dunnart	RAD51
Early pachytene	21	Fat-tailed dunnart	RAD51
Early pachytene	23	Fat-tailed dunnart	RAD51
Early pachytene	51	Fat-tailed dunnart	RAD51
Early pachytene	54	Fat-tailed dunnart	RAD51
Early pachytene	10	Fat-tailed dunnart	RAD51
Early pachytene	7	Fat-tailed dunnart	RAD51
Early pachytene	45	Fat-tailed dunnart	RAD51
Early pachytene	24	Fat-tailed dunnart	RAD51
Early pachytene	36	Fat-tailed dunnart	RAD51
Early pachytene	33	Fat-tailed dunnart	RAD51
Early pachytene	23	Fat-tailed dunnart	RAD51
Early pachytene	23	Fat-tailed dunnart	RAD51
Early pachytene	13	Fat-tailed dunnart	RAD51
Early pachytene	13	Fat-tailed dunnart	RAD51
Early pachytene	55	Fat-tailed dunnart	RAD51
Early pachytene	20	Fat-tailed dunnart	RAD51
Early pachytene	33	Fat-tailed dunnart	RAD51
Early pachytene	25	Fat-tailed dunnart	RAD51
Early pachytene	37	Fat-tailed dunnart	RAD51
Early pachytene	55	Fat-tailed dunnart	RAD51
Early pachytene	30	Fat-tailed dunnart	RAD51
Late pachytene	7	Fat-tailed dunnart	RAD51
Late pachytene	8	Fat-tailed dunnart	RAD51
Late pachytene	14	Fat-tailed dunnart	RAD51
Late pachytene	18	Fat-tailed dunnart	RAD51
Late pachytene	1	Fat-tailed dunnart	RAD51
Late pachytene	8	Fat-tailed dunnart	RAD51
Late pachytene	15	Fat-tailed dunnart	RAD51
Late pachytene	4	Fat-tailed dunnart	RAD51
Late pachytene	6	Fat-tailed dunnart	RAD51
Late pachytene	1	Fat-tailed dunnart	RAD51
Late pachytene	6	Fat-tailed dunnart	RAD51
Late pachytene	5	Fat-tailed dunnart	RAD51
Late pachytene	16	Fat-tailed dunnart	RAD51
Late pachytene	3	Fat-tailed dunnart	RAD51
Late pachytene	2	Fat-tailed dunnart	RAD51
Late pachytene	4	Fat-tailed dunnart	RAD51
Late pachytene	13	Fat-tailed dunnart	RAD51
Late pachytene	7	Fat-tailed dunnart	RAD51
Late pachytene	8	Fat-tailed dunnart	RAD51
Late pachytene	1	Fat-tailed dunnart	RAD51
Late pachytene	0	Fat-tailed dunnart	RAD51
Late pachytene	2	Fat-tailed dunnart	RAD51
Late pachytene	10	Fat-tailed dunnart	RAD51
Early zygotene	85	Fat-tailed mouse opossum	RAD51
Early zygotene	90	Fat-tailed mouse opossum	RAD51
Early zygotene	92	Fat-tailed mouse opossum	RAD51
Early zygotene	102	Fat-tailed mouse opossum	RAD51
Early zygotene	97	Fat-tailed mouse opossum	RAD51
Early zygotene	128	Fat-tailed mouse opossum	RAD51
Early zygotene	129	Fat-tailed mouse opossum	RAD51
Early zygotene	100	Fat-tailed mouse opossum	RAD51
Early zygotene	146	Fat-tailed mouse opossum	RAD51
Early zygotene	135	Fat-tailed mouse opossum	RAD51
Early zygotene	120	Fat-tailed mouse opossum	RAD51
Early zygotene	125	Fat-tailed mouse opossum	RAD51
Late zygotene	78	Fat-tailed mouse opossum	RAD51
Late zygotene	101	Fat-tailed mouse opossum	RAD51
Late zygotene	67	Fat-tailed mouse opossum	RAD51
Late zygotene	54	Fat-tailed mouse opossum	RAD51
Late zygotene	85	Fat-tailed mouse opossum	RAD51
Late zygotene	88	Fat-tailed mouse opossum	RAD51
Late zygotene	72	Fat-tailed mouse opossum	RAD51
Late zygotene	73	Fat-tailed mouse opossum	RAD51
Late zygotene	75	Fat-tailed mouse opossum	RAD51
Late zygotene	70	Fat-tailed mouse opossum	RAD51
Late zygotene	81	Fat-tailed mouse opossum	RAD51
Late zygotene	54	Fat-tailed mouse opossum	RAD51
Late zygotene	98	Fat-tailed mouse opossum	RAD51
Late zygotene	110	Fat-tailed mouse opossum	RAD51
Late zygotene	90	Fat-tailed mouse opossum	RAD51
Late zygotene	70	Fat-tailed mouse opossum	RAD51
Late zygotene	109	Fat-tailed mouse opossum	RAD51
Late zygotene	111	Fat-tailed mouse opossum	RAD51
Early pachytene	63	Fat-tailed mouse opossum	RAD51
Early pachytene	64	Fat-tailed mouse opossum	RAD51
Early pachytene	49	Fat-tailed mouse opossum	RAD51
Early pachytene	53	Fat-tailed mouse opossum	RAD51
Early pachytene	60	Fat-tailed mouse opossum	RAD51
Early pachytene	46	Fat-tailed mouse opossum	RAD51
Early pachytene	45	Fat-tailed mouse opossum	RAD51
Early pachytene	32	Fat-tailed mouse opossum	RAD51
Early pachytene	28	Fat-tailed mouse opossum	RAD51
Early pachytene	34	Fat-tailed mouse opossum	RAD51
Early pachytene	42	Fat-tailed mouse opossum	RAD51
Early pachytene	23	Fat-tailed mouse opossum	RAD51
Early pachytene	22	Fat-tailed mouse opossum	RAD51
Early pachytene	31	Fat-tailed mouse opossum	RAD51
Early pachytene	44	Fat-tailed mouse opossum	RAD51
Early pachytene	58	Fat-tailed mouse opossum	RAD51
Early pachytene	53	Fat-tailed mouse opossum	RAD51
Early pachytene	75	Fat-tailed mouse opossum	RAD51
Early pachytene	64	Fat-tailed mouse opossum	RAD51
Early pachytene	50	Fat-tailed mouse opossum	RAD51
Early pachytene	68	Fat-tailed mouse opossum	RAD51
Early pachytene	77	Fat-tailed mouse opossum	RAD51
Early pachytene	74	Fat-tailed mouse opossum	RAD51
Early pachytene	77	Fat-tailed mouse opossum	RAD51
Late pachytene	0	Fat-tailed mouse opossum	RAD51
Late pachytene	0	Fat-tailed mouse opossum	RAD51
Late pachytene	0	Fat-tailed mouse opossum	RAD51
Late pachytene	0	Fat-tailed mouse opossum	RAD51
Late pachytene	0	Fat-tailed mouse opossum	RAD51
Late pachytene	0	Fat-tailed mouse opossum	RAD51
Late pachytene	0	Fat-tailed mouse opossum	RAD51
Late pachytene	0	Fat-tailed mouse opossum	RAD51
Late pachytene	0	Fat-tailed mouse opossum	RAD51
Late pachytene	0	Fat-tailed mouse opossum	RAD51
Late pachytene	0	Fat-tailed mouse opossum	RAD51

## Sheet: Fig 7B,C,D and Fig S5D,E
Data from Fig 7B, C, D and Supplementary Fig S5D,E: Telomeric fluorescent intensities (TFUs) and areas for the mouse and fat-tailed dunnart during spermatogenesis
Cell type	Cell subtype	TFU	Spot background intensity	Telomeric area (pixels)	Telomeric area (µm2)	Specie
Spermatogonia	Spermatogonia	3242.88	17.41	43	0.74446	Fat-tailed dunnart
Spermatogonia	Spermatogonia	2047.36	16.06	43	0.74446	Fat-tailed dunnart
Spermatogonia	Spermatogonia	1330.98	14.71	44	0.761773	Fat-tailed dunnart
Spermatogonia	Spermatogonia	2150.78	9.9	33.5	0.579986	Fat-tailed dunnart
Spermatogonia	Spermatogonia	2150.78	9.9	33.5	0.579986	Fat-tailed dunnart
Spermatogonia	Spermatogonia	744.85	12.86	60	1.03878	Fat-tailed dunnart
Spermatogonia	Spermatogonia	795.93	12.77	35	0.605956	Fat-tailed dunnart
Spermatogonia	Spermatogonia	1232.44	14.57	36	0.623269	Fat-tailed dunnart
Spermatogonia	Spermatogonia	3741.5	42.03	45	0.779086	Fat-tailed dunnart
Spermatogonia	Spermatogonia	1225.63	14.43	38	0.657895	Fat-tailed dunnart
Spermatogonia	Spermatogonia	12220.2	44.38	105	1.81787	Fat-tailed dunnart
Spermatogonia	Spermatogonia	976.58	16.27	28	0.484765	Fat-tailed dunnart
Spermatogonia	Spermatogonia	2460.74	17.26	56	0.969529	Fat-tailed dunnart
Spermatogonia	Spermatogonia	3347.33	36.97	39	0.675208	Fat-tailed dunnart
Spermatogonia	Spermatogonia	2015.61	15.52	59	1.02147	Fat-tailed dunnart
Spermatogonia	Spermatogonia	842.22	13	29	0.502078	Fat-tailed dunnart
Spermatogonia	Spermatogonia	989.84	14.89	32	0.554017	Fat-tailed dunnart
Spermatogonia	Spermatogonia	1070.3	16.77	37	0.640582	Fat-tailed dunnart
Spermatogonia	Spermatogonia	1433.61	16.88	41	0.709834	Fat-tailed dunnart
Spermatogonia	Spermatogonia	324.62	11.46	28	0.484765	Fat-tailed dunnart
Spermatogonia	Spermatogonia	2246.53	16.44	39	0.675208	Fat-tailed dunnart
Spermatogonia	Spermatogonia	3060.44	20.6	38	0.657895	Fat-tailed dunnart
Spermatogonia	Spermatogonia	1511.75	14.68	32	0.554017	Fat-tailed dunnart
Spermatogonia	Spermatogonia	2406.01	15.38	51	0.882964	Fat-tailed dunnart
Spermatogonia	Spermatogonia	1501.27	16.57	34	0.588643	Fat-tailed dunnart
Spermatogonia	Spermatogonia	2380	21	33	0.57133	Fat-tailed dunnart
Spermatogonia	Spermatogonia	2206.67	19.88	40	0.692521	Fat-tailed dunnart
Spermatogonia	Spermatogonia	1693.96	14.53	39	0.675208	Fat-tailed dunnart
Spermatogonia	Spermatogonia	1762.15	13.78	41	0.709834	Fat-tailed dunnart
Spermatogonia	Spermatogonia	1985.71	18.29	33	0.57133	Fat-tailed dunnart
Spermatogonia	Spermatogonia	2481.9	17.79	32	0.554017	Fat-tailed dunnart
Spermatogonia	Spermatogonia	3112.87	15.66	52	0.900277	Fat-tailed dunnart
Spermatogonia	Spermatogonia	2452.87	14.26	54	0.934903	Fat-tailed dunnart
Spermatogonia	Spermatogonia	2839.67	16.09	47	0.813712	Fat-tailed dunnart
Spermatogonia	Spermatogonia	3949.65	17.97	51	0.882964	Fat-tailed dunnart
Spermatogonia	Spermatogonia	2297.52	19.24	43	0.74446	Fat-tailed dunnart
Spermatogonia	Spermatogonia	1765.83	15.38	41	0.709834	Fat-tailed dunnart
Spermatogonia	Spermatogonia	5466.03	21.43	66	1.14266	Fat-tailed dunnart
Spermatogonia	Spermatogonia	1374.31	17.62	43	0.74446	Fat-tailed dunnart
Spermatogonia	Spermatogonia	4402.1	19.28	47	0.813712	Fat-tailed dunnart
Spermatogonia	Spermatogonia	2830.23	18.18	51	0.882964	Fat-tailed dunnart
Spermatogonia	Spermatogonia	2690.69	14.76	58	1.00416	Fat-tailed dunnart
Spermatogonia	Spermatogonia	2289.15	14.53	47	0.813712	Fat-tailed dunnart
Spermatogonia	Spermatogonia	2092.28	13.42	51	0.882964	Fat-tailed dunnart
Spermatogonia	Spermatogonia	510.79	11.86	34	0.588643	Fat-tailed dunnart
Spermatogonia	Spermatogonia	2574.72	20.56	38	0.657895	Fat-tailed dunnart
Spermatogonia	Spermatogonia	2336.98	20.79	31	0.536704	Fat-tailed dunnart
Spermatogonia	Spermatogonia	1621.88	18.91	41	0.709834	Fat-tailed dunnart
Spermatogonia	Spermatogonia	3124	31.6	37	0.640582	Fat-tailed dunnart
Spermatogonia	Spermatogonia	1276.49	27.1	37	0.640582	Fat-tailed dunnart
Spermatogonia	Spermatogonia	1969.35	18.62	45	0.779086	Fat-tailed dunnart
Spermatogonia	Spermatogonia	1495	18.78	40	0.692521	Fat-tailed dunnart
Spermatogonia	Spermatogonia	941.7	15.03	42	0.727147	Fat-tailed dunnart
Spermatogonia	Spermatogonia	1095.78	18.08	52	0.900277	Fat-tailed dunnart
Spermatogonia	Spermatogonia	628.89	19.38	24	0.415512	Fat-tailed dunnart
Spermatogonia	Spermatogonia	1234.22	16.77	36	0.623269	Fat-tailed dunnart
Spermatogonia	Spermatogonia	1563.1	18.32	33	0.57133	Fat-tailed dunnart
Spermatogonia	Spermatogonia	606.35	19.57	30	0.519391	Fat-tailed dunnart
Spermatogonia	Spermatogonia	329.54	20.29	23	0.398199	Fat-tailed dunnart
Spermatogonia	Spermatogonia	2215.56	17.67	36	0.623269	Fat-tailed dunnart
Spermatogonia	Spermatogonia	1699.86	17.44	39	0.675208	Fat-tailed dunnart
Spermatogonia	Spermatogonia	1826.67	20.5	40	0.692521	Fat-tailed dunnart
Spermatogonia	Spermatogonia	1976.11	17.47	40	0.692521	Fat-tailed dunnart
Spermatogonia	Spermatogonia	3170.77	30.95	77	1.3331	Fat-tailed dunnart
Spermatogonia	Spermatogonia	2478.81	20.93	37	0.640582	Fat-tailed dunnart
Spermatogonia	Spermatogonia	2645.56	32.25	50	0.865651	Fat-tailed dunnart
Spermatogonia	Spermatogonia	365.19	15.33	23	0.398199	Fat-tailed dunnart
Spermatogonia	Spermatogonia	231.92	16.18	20	0.34626	Fat-tailed dunnart
Spermatogonia	Spermatogonia	2036.67	19.69	40	0.692521	Fat-tailed dunnart
Spermatogonia	Spermatogonia	1244.76	16.71	32	0.554017	Fat-tailed dunnart
Spermatogonia	Spermatogonia	866.67	19.38	40	0.692521	Fat-tailed dunnart
Spermatogonia	Spermatogonia	451.11	13.67	24	0.415512	Fat-tailed dunnart
Spermatogonia	Spermatogonia	1937.7	18.61	33	0.57133	Fat-tailed dunnart
Spermatogonia	Spermatogonia	899.13	23.46	31	0.536704	Fat-tailed dunnart
Spermatogonia	Spermatogonia	823.75	26.19	39	0.675208	Fat-tailed dunnart
Spermatogonia	Spermatogonia	524.44	24.5	28	0.484765	Fat-tailed dunnart
Spermatogonia	Spermatogonia	1814.1	23.41	41	0.709834	Fat-tailed dunnart
Spermatogonia	Spermatogonia	911.27	30.64	31	0.536704	Fat-tailed dunnart
Spermatogonia	Spermatogonia	3596.08	31.91	48	0.831025	Fat-tailed dunnart
Spermatogonia	Spermatogonia	390.24	24.46	31	0.536704	Fat-tailed dunnart
Spermatogonia	Spermatogonia	2842.41	27.53	51	0.882964	Fat-tailed dunnart
Spermatogonia	Spermatogonia	1719.61	29.35	43	0.74446	Fat-tailed dunnart
Spermatogonia	Spermatogonia	1780.14	24.81	43	0.74446	Fat-tailed dunnart
Spermatogonia	Spermatogonia	693.17	24.68	34	0.588643	Fat-tailed dunnart
Spermatogonia	Spermatogonia	715.24	22.04	32	0.554017	Fat-tailed dunnart
Spermatogonia	Spermatogonia	1154	23.1	37	0.640582	Fat-tailed dunnart
Spermatogonia	Spermatogonia	1329.03	22.56	39	0.675208	Fat-tailed dunnart
Spermatogonia	Spermatogonia	2793.07	26.69	61	1.05609	Fat-tailed dunnart
Spermatogonia	Spermatogonia	623.11	24.4	34	0.588643	Fat-tailed dunnart
Spermatogonia	Spermatogonia	681.59	29.82	32	0.554017	Fat-tailed dunnart
Spermatogonia	Spermatogonia	3303.19	27.15	76	1.31579	Fat-tailed dunnart
Spermatogonia	Spermatogonia	2379.78	28.9	39	0.675208	Fat-tailed dunnart
Spermatogonia	Spermatogonia	462.56	24.85	27	0.467452	Fat-tailed dunnart
Spermatogonia	Spermatogonia	1939.52	30.36	65	1.12535	Fat-tailed dunnart
Spermatogonia	Spermatogonia	2741.52	32.23	63	1.09072	Fat-tailed dunnart
Spermatogonia	Spermatogonia	1633.33	21	37	0.640582	Fat-tailed dunnart
Spermatogonia	Spermatogonia	864.59	20.23	34	0.588643	Fat-tailed dunnart
Spermatogonia	Spermatogonia	184.44	20.75	16	0.277008	Fat-tailed dunnart
Spermatogonia	Spermatogonia	743.93	18.12	28	0.484765	Fat-tailed dunnart
Spermatogonia	Spermatogonia	1035.19	19.63	35	0.605956	Fat-tailed dunnart
Spermatogonia	Spermatogonia	1416.67	19.69	40	0.692521	Fat-tailed dunnart
Spermatogonia	Spermatogonia	795.56	20.15	26	0.450139	Fat-tailed dunnart
Spermatogonia	Spermatogonia	420.24	25.89	29	0.502078	Fat-tailed dunnart
Spermatogonia	Spermatogonia	493.33	26.31	26	0.450139	Fat-tailed dunnart
Spermatogonia	Spermatogonia	1244.92	21.36	33	0.57133	Fat-tailed dunnart
Spermatogonia	Spermatogonia	773.33	25.35	26	0.450139	Fat-tailed dunnart
Spermatogonia	Spermatogonia	995.04	23.81	30	0.519391	Fat-tailed dunnart
Spermatogonia	Spermatogonia	1748.73	20.54	30	0.519391	Fat-tailed dunnart
Spermatogonia	Spermatogonia	921.43	21.68	30	0.519391	Fat-tailed dunnart
Spermatogonia	Spermatogonia	1757.44	25.54	30	0.519391	Fat-tailed dunnart
Spermatogonia	Spermatogonia	1098.4	17.61	47	0.813712	Fat-tailed dunnart
Spermatogonia	Spermatogonia	349.06	23.08	25	0.432825	Fat-tailed dunnart
Spermatogonia	Spermatogonia	1472	21.43	36	0.623269	Fat-tailed dunnart
Spermatogonia	Spermatogonia	1756	47.1	38	0.657895	Fat-tailed dunnart
Spermatogonia	Spermatogonia	542.64	15.91	34	0.588643	Fat-tailed dunnart
Spermatogonia	Spermatogonia	353.7	20.17	23	0.398199	Fat-tailed dunnart
Spermatogonia	Spermatogonia	787.5	20.38	23	0.398199	Fat-tailed dunnart
Spermatogonia	Spermatogonia	336.36	20.18	20	0.34626	Fat-tailed dunnart
Spermatogonia	Spermatogonia	302.22	19.42	26	0.450139	Fat-tailed dunnart
Spermatogonia	Spermatogonia	2858.76	25.32	45	0.779086	Fat-tailed dunnart
Spermatogonia	Spermatogonia	1054.72	21.13	43	0.74446	Fat-tailed dunnart
Spermatogonia	Spermatogonia	1369.52	21.93	32	0.554017	Fat-tailed dunnart
Spermatogonia	Spermatogonia	1682.56	20.92	28	0.484765	Fat-tailed dunnart
Spermatogonia	Spermatogonia	1863.93	19.12	28	0.484765	Fat-tailed dunnart
Spermatogonia	Spermatogonia	2213.65	20.29	31	0.536704	Fat-tailed dunnart
Spermatogonia	Spermatogonia	6632.7	29.86	61	1.05609	Fat-tailed dunnart
Spermatogonia	Spermatogonia	986.67	20	32	0.554017	Fat-tailed dunnart
Spermatogonia	Spermatogonia	1319.17	32.38	25	0.432825	Fat-tailed dunnart
Spermatogonia	Spermatogonia	219.49	16.59	19	0.328947	Fat-tailed dunnart
Spermatogonia	Spermatogonia	651.88	18.65	27	0.467452	Fat-tailed dunnart
Spermatogonia	Spermatogonia	340.17	17.04	24	0.415512	Fat-tailed dunnart
Spermatogonia	Spermatogonia	1136.41	23.62	27	0.467452	Fat-tailed dunnart
Spermatogonia	Spermatogonia	1525.64	26.73	28	0.484765	Fat-tailed dunnart
Spermatogonia	Spermatogonia	1051.75	20.36	30	0.519391	Fat-tailed dunnart
Spermatogonia	Spermatogonia	856	17.47	36	0.623269	Fat-tailed dunnart
Spermatogonia	Spermatogonia	1382.94	20.89	31	0.536704	Fat-tailed dunnart
Spermatogonia	Spermatogonia	1399.44	18.14	45	0.779086	Fat-tailed dunnart
Spermatogonia	Spermatogonia	1386.22	24.53	36	0.623269	Fat-tailed dunnart
Spermatogonia	Spermatogonia	1432.37	23.63	37	0.640582	Fat-tailed dunnart
Spermatogonia	Spermatogonia	834.07	20.17	34	0.588643	Fat-tailed dunnart
Spermatogonia	Spermatogonia	633.33	16.04	26	0.450139	Fat-tailed dunnart
Spermatogonia	Spermatogonia	1396.67	21.25	30	0.519391	Fat-tailed dunnart
Spermatogonia	Spermatogonia	437.78	18.04	26	0.450139	Fat-tailed dunnart
Spermatogonia	Spermatogonia	1272.78	19.25	33	0.57133	Fat-tailed dunnart
Spermatogonia	Spermatogonia	2252.06	20.89	32	0.554017	Fat-tailed dunnart
Spermatogonia	Spermatogonia	3525.28	19.375	25.5	0.441482	Fat-tailed dunnart
Spermatogonia	Spermatogonia	3525.28	19.375	25.5	0.441482	Fat-tailed dunnart
Spermatogonia	Spermatogonia	1344.13	25.04	32	0.554017	Fat-tailed dunnart
Spermatogonia	Spermatogonia	2482.65	25.27	29	0.502078	Fat-tailed dunnart
Spermatogonia	Spermatogonia	1445.56	24.7	35	0.605956	Fat-tailed dunnart
Spermatogonia	Spermatogonia	969.49	20.73	27	0.467452	Fat-tailed dunnart
Spermatogonia	Spermatogonia	975.11	21.7	36	0.623269	Fat-tailed dunnart
Spermatogonia	Spermatogonia	337.78	18.12	26	0.450139	Fat-tailed dunnart
Spermatogonia	Spermatogonia	601.97	19.12	27	0.467452	Fat-tailed dunnart
Spermatogonia	Spermatogonia	2293.41	35.32	31	0.536704	Fat-tailed dunnart
Spermatogonia	Spermatogonia	1533.89	21.09	40	0.692521	Fat-tailed dunnart
Spermatogonia	Spermatogonia	2250.79	21.54	32	0.554017	Fat-tailed dunnart
Spermatogonia	Spermatogonia	423.8	21.29	25	0.432825	Fat-tailed dunnart
Spermatogonia	Spermatogonia	1315.04	19.62	28	0.484765	Fat-tailed dunnart
Spermatogonia	Spermatogonia	606.58	18.04	27	0.467452	Fat-tailed dunnart
Spermatogonia	Spermatogonia	2239.36	20.82	32	0.554017	Fat-tailed dunnart
Spermatogonia	Spermatogonia	1276.25	22.78	38	0.657895	Fat-tailed dunnart
Spermatogonia	Spermatogonia	636.41	22.81	28	0.484765	Fat-tailed dunnart
Spermatogonia	Spermatogonia	2002.96	30.83	38	0.657895	Fat-tailed dunnart
Spermatogonia	Spermatogonia	423.93	20.08	29	0.502078	Fat-tailed dunnart
Spermatogonia	Spermatogonia	396.67	17.5	27	0.467452	Fat-tailed dunnart
Spermatogonia	Spermatogonia	1599.93	22.72	39	0.675208	Fat-tailed dunnart
Spermatogonia	Spermatogonia	1463.81	19.82	32	0.554017	Fat-tailed dunnart
Spermatogonia	Spermatogonia	567.01	19.85	27	0.467452	Fat-tailed dunnart
Spermatogonia	Spermatogonia	2524.94	23.61	52	0.900277	Fat-tailed dunnart
Spermatogonia	Spermatogonia	585.56	21.25	38	0.657895	Fat-tailed dunnart
Spermatogonia	Spermatogonia	1637.38	20.04	33	0.57133	Fat-tailed dunnart
Spermatogonia	Spermatogonia	488.89	22.75	24	0.415512	Fat-tailed dunnart
Spermatogonia	Spermatogonia	1556.89	21.73	36	0.623269	Fat-tailed dunnart
Spermatogonia	Spermatogonia	762.86	20.57	31	0.536704	Fat-tailed dunnart
Spermatogonia	Spermatogonia	475.69	18.82	40	0.692521	Fat-tailed dunnart
Spermatogonia	Spermatogonia	1541.2	20.15	29	0.502078	Fat-tailed dunnart
Spermatogonia	Spermatogonia	3742.88	29.29	50	0.865651	Fat-tailed dunnart
Spermatogonia	Spermatogonia	1577.78	23	46	0.796399	Fat-tailed dunnart
Spermatogonia	Spermatogonia	1866.83	23.32	34	0.588643	Fat-tailed dunnart
Spermatogonia	Spermatogonia	664.68	17.96	31	0.536704	Fat-tailed dunnart
Spermatogonia	Spermatogonia	662.22	21	27	0.467452	Fat-tailed dunnart
Spermatogonia	Spermatogonia	5484.85	37.55	62	1.07341	Fat-tailed dunnart
Spermatogonia	Spermatogonia	701.62	23.27	27	0.467452	Fat-tailed dunnart
Spermatogonia	Spermatogonia	337.78	28.35	26	0.450139	Fat-tailed dunnart
Spermatogonia	Spermatogonia	1668.75	26.84	38	0.657895	Fat-tailed dunnart
Spermatogonia	Spermatogonia	385.46	28.46	23	0.398199	Fat-tailed dunnart
Spermatogonia	Spermatogonia	645.56	23.5	27	0.467452	Fat-tailed dunnart
Spermatogonia	Spermatogonia	3477.22	24.16	40	0.692521	Fat-tailed dunnart
Spermatogonia	Spermatogonia	620.94	20.19	29	0.502078	Fat-tailed dunnart
Spermatogonia	Spermatogonia	1638.52	20.13	35	0.605956	Fat-tailed dunnart
Spermatogonia	Spermatogonia	2645.73	23.08	56	0.969529	Fat-tailed dunnart
Spermatogonia	Spermatogonia	2809.17	24.73	55	0.952216	Fat-tailed dunnart
Spermatogonia	Spermatogonia	4208.89	28	42	0.727147	Fat-tailed dunnart
Spermatogonia	Spermatogonia	2122.88	23.88	45	0.779086	Fat-tailed dunnart
Spermatogonia	Spermatogonia	718.8	19.85	29	0.502078	Fat-tailed dunnart
Spermatogonia	Spermatogonia	363.81	18.14	30	0.519391	Fat-tailed dunnart
Spermatogonia	Spermatogonia	2314.22	23.3	52	0.900277	Fat-tailed dunnart
Spermatogonia	Spermatogonia	982.48	24.88	27	0.467452	Fat-tailed dunnart
Spermatogonia	Spermatogonia	2210.07	21.93	38	0.657895	Fat-tailed dunnart
Spermatogonia	Spermatogonia	1552.32	20.18	41	0.709834	Fat-tailed dunnart
Spermatogonia	Spermatogonia	1458.26	31.34	43	0.74446	Fat-tailed dunnart
Spermatogonia	Spermatogonia	1790.22	23.93	39	0.675208	Fat-tailed dunnart
Spermatogonia	Spermatogonia	695.71	31.96	30	0.519391	Fat-tailed dunnart
Spermatogonia	Spermatogonia	288.89	29.27	26	0.450139	Fat-tailed dunnart
Spermatogonia	Spermatogonia	855.56	21.35	26	0.450139	Fat-tailed dunnart
Spermatogonia	Spermatogonia	2202.22	22	50	0.865651	Fat-tailed dunnart
Spermatogonia	Spermatogonia	2517.62	29.21	33	0.57133	Fat-tailed dunnart
Spermatogonia	Spermatogonia	1835.69	23.71	41	0.709834	Fat-tailed dunnart
Spermatogonia	Spermatogonia	2248.89	23	38	0.657895	Fat-tailed dunnart
Spermatogonia	Spermatogonia	1814.71	10.91	30.5	0.528047	Fat-tailed dunnart
Spermatogonia	Spermatogonia	1814.71	10.91	30.5	0.528047	Fat-tailed dunnart
Spermatogonia	Spermatogonia	1490.17	9.67	33.5	0.579986	Fat-tailed dunnart
Spermatogonia	Spermatogonia	1490.17	9.67	33.5	0.579986	Fat-tailed dunnart
Spermatogonia	Spermatogonia	1521.78	17.87	36	0.623269	Fat-tailed dunnart
Spermatogonia	Spermatogonia	2277.78	18.75	32	0.554017	Fat-tailed dunnart
Spermatogonia	Spermatogonia	1447.78	28.9	35	0.605956	Fat-tailed dunnart
Spermatogonia	Spermatogonia	4007.78	20.47	54	0.934903	Fat-tailed dunnart
Spermatogonia	Spermatogonia	921.3	28.42	25	0.432825	Fat-tailed dunnart
Spermatogonia	Spermatogonia	1452.63	8.735	26	0.450139	Fat-tailed dunnart
Spermatogonia	Spermatogonia	1452.63	8.735	26	0.450139	Fat-tailed dunnart
Spermatogonia	Spermatogonia	2342.08	21.34	38	0.657895	Fat-tailed dunnart
Spermatogonia	Spermatogonia	3063.79	18.24	48	0.831025	Fat-tailed dunnart
Spermatogonia	Spermatogonia	568.89	15	24	0.415512	Fat-tailed dunnart
Spermatogonia	Spermatogonia	302.22	14.54	24	0.415512	Fat-tailed dunnart
Spermatogonia	Spermatogonia	387.18	20.77	27	0.467452	Fat-tailed dunnart
Spermatogonia	Spermatogonia	844.36	24.35	29	0.502078	Fat-tailed dunnart
Spermatogonia	Spermatogonia	2239.44	20.75	35	0.605956	Fat-tailed dunnart
Spermatogonia	Spermatogonia	2482.04	18.47	51	0.882964	Fat-tailed dunnart
Spermatogonia	Spermatogonia	372.06	14.79	30	0.519391	Fat-tailed dunnart
Spermatogonia	Spermatogonia	1081.33	13.73	36	0.623269	Fat-tailed dunnart
Spermatogonia	Spermatogonia	1843.5	18.42	27	0.467452	Fat-tailed dunnart
Spermatogonia	Spermatogonia	975.38	15.04	28	0.484765	Fat-tailed dunnart
Spermatogonia	Spermatogonia	761.6	14.03	41	0.709834	Fat-tailed dunnart
Spermatogonia	Spermatogonia	871.11	15	32	0.554017	Fat-tailed dunnart
Spermatogonia	Spermatogonia	311.3	12.92	25	0.432825	Fat-tailed dunnart
Spermatogonia	Spermatogonia	627.38	16.89	31	0.536704	Fat-tailed dunnart
Spermatogonia	Spermatogonia	1936.34	21.29	43	0.74446	Fat-tailed dunnart
Spermatogonia	Spermatogonia	903.89	13.75	31	0.536704	Fat-tailed dunnart
Spermatogonia	Spermatogonia	1110.67	13.8	34	0.588643	Fat-tailed dunnart
Spermatogonia	Spermatogonia	12529.5	26.92	91	1.57548	Fat-tailed dunnart
Spermatogonia	Spermatogonia	2975.38	21.77	30	0.519391	Fat-tailed dunnart
Spermatogonia	Spermatogonia	1378.24	16.85	49	0.848338	Fat-tailed dunnart
Spermatogonia	Spermatogonia	918.89	22.5	39	0.675208	Fat-tailed dunnart
Spermatogonia	Spermatogonia	317.18	17.73	25	0.432825	Fat-tailed dunnart
Spermatogonia	Spermatogonia	4779.12	19.9	73	1.26385	Fat-tailed dunnart
Spermatogonia	Spermatogonia	3968.44	30.6	37	0.640582	Fat-tailed dunnart
Spermatogonia	Spermatogonia	1880.08	32.39	33	0.57133	Fat-tailed dunnart
Spermatogonia	Spermatogonia	1246.19	30.07	31	0.536704	Fat-tailed dunnart
Spermatogonia	Spermatogonia	862.05	15.04	28	0.484765	Fat-tailed dunnart
Spermatogonia	Spermatogonia	826.67	15.21	24	0.415512	Fat-tailed dunnart
Spermatogonia	Spermatogonia	4550.07	22.43	38	0.657895	Fat-tailed dunnart
Spermatogonia	Spermatogonia	7201.4	24.84	61	1.05609	Fat-tailed dunnart
Spermatogonia	Spermatogonia	2056.03	21.93	31	0.536704	Fat-tailed dunnart
Spermatogonia	Spermatogonia	8046.33	27.15	61	1.05609	Fat-tailed dunnart
Spermatogonia	Spermatogonia	2006.11	17.41	40	0.692521	Fat-tailed dunnart
Spermatogonia	Spermatogonia	963.21	14.69	44	0.761773	Fat-tailed dunnart
Spermatogonia	Spermatogonia	1310.71	15.39	31	0.536704	Fat-tailed dunnart
Spermatogonia	Spermatogonia	3550	20.56	40	0.692521	Fat-tailed dunnart
Spermatogonia	Spermatogonia	937.01	14.59	41	0.709834	Fat-tailed dunnart
Spermatogonia	Spermatogonia	1325.08	15.68	32	0.554017	Fat-tailed dunnart
Spermatogonia	Spermatogonia	632.91	16.65	45	0.779086	Fat-tailed dunnart
Spermatogonia	Spermatogonia	2504.74	17.23	38	0.657895	Fat-tailed dunnart
Spermatogonia	Spermatogonia	2541.44	19.29	42	0.727147	Fat-tailed dunnart
Spermatogonia	Spermatogonia	6315.12	24.49	82	1.41967	Fat-tailed dunnart
Spermatogonia	Spermatogonia	1406.67	19.42	26	0.450139	Fat-tailed dunnart
Spermatogonia	Spermatogonia	2732.5	18.44	42	0.727147	Fat-tailed dunnart
Spermatogonia	Spermatogonia	2681.21	18.32	58	1.00416	Fat-tailed dunnart
Spermatogonia	Spermatogonia	1753.33	20.95	57	0.986842	Fat-tailed dunnart
Spermatogonia	Spermatogonia	192.44	16.9	16	0.277008	Fat-tailed dunnart
Spermatogonia	Spermatogonia	604.44	17.42	24	0.415512	Fat-tailed dunnart
Spermatogonia	Spermatogonia	1836.19	24.29	34	0.588643	Fat-tailed dunnart
Spermatogonia	Spermatogonia	2654.53	20.15	29	0.502078	Fat-tailed dunnart
Spermatogonia	Spermatogonia	2250.82	17.82	59	1.02147	Fat-tailed dunnart
Spermatogonia	Spermatogonia	1099.67	15.73	54	0.934903	Fat-tailed dunnart
Spermatogonia	Spermatogonia	3787.29	19.97	41	0.709834	Fat-tailed dunnart
Spermatogonia	Spermatogonia	327.5	16.63	25	0.432825	Fat-tailed dunnart
Spermatogonia	Spermatogonia	653.06	18.28	36	0.623269	Fat-tailed dunnart
Spermatogonia	Spermatogonia	483.68	18.35	27	0.467452	Fat-tailed dunnart
Spermatogonia	Spermatogonia	948.21	19.15	28	0.484765	Fat-tailed dunnart
Spermatogonia	Spermatogonia	621.2	16.73	28	0.484765	Fat-tailed dunnart
Spermatogonia	Spermatogonia	944.13	18.71	31	0.536704	Fat-tailed dunnart
Spermatogonia	Spermatogonia	400	17.38	24	0.415512	Fat-tailed dunnart
Spermatogonia	Spermatogonia	535.38	18.08	27	0.467452	Fat-tailed dunnart
Spermatogonia	Spermatogonia	627.3	18.36	30	0.519391	Fat-tailed dunnart
Spermatogonia	Spermatogonia	411.11	22.42	26	0.450139	Fat-tailed dunnart
Spermatogonia	Spermatogonia	902.74	18.88	28	0.484765	Fat-tailed dunnart
Spermatogonia	Spermatogonia	548.89	17.77	26	0.450139	Fat-tailed dunnart
Spermatogonia	Spermatogonia	605.19	18.73	35	0.605956	Fat-tailed dunnart
Spermatogonia	Spermatogonia	1849.33	20.8	36	0.623269	Fat-tailed dunnart
Spermatogonia	Spermatogonia	738.67	20.77	36	0.623269	Fat-tailed dunnart
Spermatogonia	Spermatogonia	823.33	18.5	29	0.502078	Fat-tailed dunnart
Spermatogonia	Spermatogonia	371.11	16.65	26	0.450139	Fat-tailed dunnart
Spermatogonia	Spermatogonia	379.66	24.15	27	0.467452	Fat-tailed dunnart
Spermatogonia	Spermatogonia	1627.78	16.19	40	0.692521	Fat-tailed dunnart
Spermatogonia	Spermatogonia	1663.81	23.82	32	0.554017	Fat-tailed dunnart
Spermatogonia	Spermatogonia	412.87	21.79	23	0.398199	Fat-tailed dunnart
Spermatogonia	Spermatogonia	951.97	16.62	27	0.467452	Fat-tailed dunnart
Spermatogonia	Spermatogonia	1960.97	18.16	42	0.727147	Fat-tailed dunnart
Spermatogonia	Spermatogonia	1838.43	19.26	48	0.831025	Fat-tailed dunnart
Spermatogonia	Spermatogonia	2078.6	18.97	52	0.900277	Fat-tailed dunnart
Spermatogonia	Spermatogonia	990.43	17.15	28	0.484765	Fat-tailed dunnart
Spermatogonia	Spermatogonia	2710.81	12.365	54.5	0.94356	Fat-tailed dunnart
Spermatogonia	Spermatogonia	2710.81	12.365	54.5	0.94356	Fat-tailed dunnart
Spermatogonia	Spermatogonia	490	20.5	33	0.57133	Fat-tailed dunnart
Spermatogonia	Spermatogonia	481.9	20.57	30	0.519391	Fat-tailed dunnart
Spermatogonia	Spermatogonia	277.22	19.38	22	0.380886	Fat-tailed dunnart
Spermatogonia	Spermatogonia	1225.19	18.67	37	0.640582	Fat-tailed dunnart
Spermatogonia	Spermatogonia	2693.2	21.71	44	0.761773	Fat-tailed dunnart
Spermatogonia	Spermatogonia	3439.88	25.94	53	0.91759	Fat-tailed dunnart
Spermatogonia	Spermatogonia	897.78	17.67	36	0.623269	Fat-tailed dunnart
Spermatogonia	Spermatogonia	372.05	15.58	27	0.467452	Fat-tailed dunnart
Spermatogonia	Spermatogonia	647.78	18.5	29	0.502078	Fat-tailed dunnart
Spermatogonia	Spermatogonia	308.46	15.19	27	0.467452	Fat-tailed dunnart
Spermatogonia	Spermatogonia	876.07	17.77	27	0.467452	Fat-tailed dunnart
Spermatogonia	Spermatogonia	1747.47	17.68	64	1.10803	Fat-tailed dunnart
Spermatogonia	Spermatogonia	700.63	16.36	30	0.519391	Fat-tailed dunnart
Spermatogonia	Spermatogonia	568.89	16	25	0.432825	Fat-tailed dunnart
Spermatogonia	Spermatogonia	2273.33	26.2	35	0.605956	Fat-tailed dunnart
Spermatogonia	Spermatogonia	388.46	17.19	27	0.467452	Fat-tailed dunnart
Spermatogonia	Spermatogonia	1592.86	17.64	33	0.57133	Fat-tailed dunnart
Spermatogonia	Spermatogonia	1762.64	17.69	39	0.675208	Fat-tailed dunnart
Spermatogonia	Spermatogonia	1935.91	12.925	21.5	0.37223	Fat-tailed dunnart
Spermatogonia	Spermatogonia	1935.91	12.925	21.5	0.37223	Fat-tailed dunnart
Spermatogonia	Spermatogonia	393.33	14.77	26	0.450139	Fat-tailed dunnart
Spermatogonia	Spermatogonia	628.61	14.38	51	0.882964	Fat-tailed dunnart
Spermatogonia	Spermatogonia	682.11	9.65	18.5	0.320291	Fat-tailed dunnart
Spermatogonia	Spermatogonia	682.11	9.65	18.5	0.320291	Fat-tailed dunnart
Spermatogonia	Spermatogonia	564.79	14.92	28	0.484765	Fat-tailed dunnart
Spermatogonia	Spermatogonia	904.1	18.58	28	0.484765	Fat-tailed dunnart
Spermatogonia	Spermatogonia	1040	17	32	0.554017	Fat-tailed dunnart
Spermatogonia	Spermatogonia	954.53	17.46	27	0.467452	Fat-tailed dunnart
Spermatogonia	Spermatogonia	464.87	15.81	27	0.467452	Fat-tailed dunnart
Spermatogonia	Spermatogonia	1159.84	17.36	31	0.536704	Fat-tailed dunnart
Spermatogonia	Spermatogonia	775.56	18.25	24	0.415512	Fat-tailed dunnart
Spermatogonia	Spermatogonia	1845.14	16.78	38	0.657895	Fat-tailed dunnart
Spermatogonia	Spermatogonia	406.67	15.58	26	0.450139	Fat-tailed dunnart
Spermatogonia	Spermatogonia	3567.39	18.07	67	1.15997	Fat-tailed dunnart
Spermatogonia	Spermatogonia	2215.71	22.32	34	0.588643	Fat-tailed dunnart
Spermatogonia	Spermatogonia	2599.4	20.42	29	0.502078	Fat-tailed dunnart
Spermatogonia	Spermatogonia	887.61	16.58	27	0.467452	Fat-tailed dunnart
Spermatogonia	Spermatogonia	725.99	15.47	43	0.74446	Fat-tailed dunnart
Spermatogonia	Spermatogonia	506.32	16.08	28	0.484765	Fat-tailed dunnart
Spermatogonia	Spermatogonia	1486.26	17.27	63	1.09072	Fat-tailed dunnart
Spermatogonia	Spermatogonia	1462.07	19.77	34	0.588643	Fat-tailed dunnart
Spermatogonia	Spermatogonia	1723.59	21.46	29	0.502078	Fat-tailed dunnart
Spermatogonia	Spermatogonia	1564.44	19	35	0.605956	Fat-tailed dunnart
Spermatogonia	Spermatogonia	349.13	15.96	31	0.536704	Fat-tailed dunnart
Spermatogonia	Spermatogonia	1445.7	19.63	37	0.640582	Fat-tailed dunnart
Spermatogonia	Spermatogonia	1281.67	17.25	33	0.57133	Fat-tailed dunnart
Spermatogonia	Spermatogonia	1530.68	17.73	29	0.502078	Fat-tailed dunnart
Spermatogonia	Spermatogonia	2364.24	19.28	43	0.74446	Fat-tailed dunnart
Spermatogonia	Spermatogonia	488.89	14.5	28	0.484765	Fat-tailed dunnart
Spermatogonia	Spermatogonia	1897.08	19.72	38	0.657895	Fat-tailed dunnart
Spermatogonia	Spermatogonia	340.37	16.17	23	0.398199	Fat-tailed dunnart
Spermatogonia	Spermatogonia	483.47	19.41	38	0.657895	Fat-tailed dunnart
Spermatogonia	Spermatogonia	1285.71	20.11	32	0.554017	Fat-tailed dunnart
Spermatogonia	Spermatogonia	1604.44	18	42	0.727147	Fat-tailed dunnart
Spermatogonia	Spermatogonia	1250.46	18.94	46	0.796399	Fat-tailed dunnart
Spermatogonia	Spermatogonia	1916.44	19.6	36	0.623269	Fat-tailed dunnart
Spermatogonia	Spermatogonia	1184.03	16.31	39	0.675208	Fat-tailed dunnart
Spermatogonia	Spermatogonia	308.89	16.21	24	0.415512	Fat-tailed dunnart
Spermatogonia	Spermatogonia	498.57	16.64	29	0.502078	Fat-tailed dunnart
Spermatogonia	Spermatogonia	701.89	8.225	27	0.467452	Fat-tailed dunnart
Spermatogonia	Spermatogonia	701.89	8.225	27	0.467452	Fat-tailed dunnart
Spermatogonia	Spermatogonia	567.18	16.88	28	0.484765	Fat-tailed dunnart
Spermatogonia	Spermatogonia	1854.71	17.85	45	0.779086	Fat-tailed dunnart
Spermatogonia	Spermatogonia	550.52	20.07	34	0.588643	Fat-tailed dunnart
Spermatogonia	Spermatogonia	704.37	18.68	31	0.536704	Fat-tailed dunnart
Spermatogonia	Spermatogonia	1544.76	24.57	33	0.57133	Fat-tailed dunnart
Spermatogonia	Spermatogonia	1335	32.36	45	0.779086	Fat-tailed dunnart
Spermatogonia	Spermatogonia	7698.89	32.5	55	0.952216	Fat-tailed dunnart
Spermatogonia	Spermatogonia	537.18	15.42	29	0.502078	Fat-tailed dunnart
Spermatogonia	Spermatogonia	576.07	16.38	28	0.484765	Fat-tailed dunnart
Spermatogonia	Spermatogonia	1138.26	17.97	39	0.675208	Fat-tailed dunnart
Spermatogonia	Spermatogonia	1099.97	8.32	23.5	0.406856	Fat-tailed dunnart
Spermatogonia	Spermatogonia	1099.97	8.32	23.5	0.406856	Fat-tailed dunnart
Spermatogonia	Spermatogonia	933.02	15.43	33	0.57133	Fat-tailed dunnart
Spermatogonia	Spermatogonia	979.05	18.36	32	0.554017	Fat-tailed dunnart
Spermatogonia	Spermatogonia	2737.1	23.03	47	0.813712	Fat-tailed dunnart
Spermatogonia	Spermatogonia	2483.85	28.03	38	0.657895	Fat-tailed dunnart
Spermatogonia	Spermatogonia	269.17	20.13	23	0.398199	Fat-tailed dunnart
Spermatogonia	Spermatogonia	474.7	22.38	27	0.467452	Fat-tailed dunnart
Spermatogonia	Spermatogonia	3975.51	16.96	43.5	0.753116	Fat-tailed dunnart
Spermatogonia	Spermatogonia	3975.51	16.96	43.5	0.753116	Fat-tailed dunnart
Spermatogonia	Spermatogonia	508.06	18.84	36	0.623269	Fat-tailed dunnart
Spermatogonia	Spermatogonia	516.9	20.46	31	0.536704	Fat-tailed dunnart
Spermatogonia	Spermatogonia	1614.85	19.21	49	0.848338	Fat-tailed dunnart
Spermatogonia	Spermatogonia	395.56	19.65	26	0.450139	Fat-tailed dunnart
Spermatogonia	Spermatogonia	980	18.5	42	0.727147	Fat-tailed dunnart
Spermatogonia	Spermatogonia	1079.21	19.79	31	0.536704	Fat-tailed dunnart
Spermatogonia	Spermatogonia	535.56	17	38	0.657895	Fat-tailed dunnart
Spermatogonia	Spermatogonia	566.67	19	24	0.415512	Fat-tailed dunnart
Spermatogonia	Spermatogonia	3168.33	20.78	40	0.692521	Fat-tailed dunnart
Spermatogonia	Spermatogonia	540.26	21.88	27	0.467452	Fat-tailed dunnart
Spermatogonia	Spermatogonia	2404.51	20.22	41	0.709834	Fat-tailed dunnart
Spermatogonia	Spermatogonia	938.59	17.23	37	0.640582	Fat-tailed dunnart
Spermatogonia	Spermatogonia	565.63	15.82	31	0.536704	Fat-tailed dunnart
Spermatogonia	Spermatogonia	1294.39	9.84	34.5	0.597299	Fat-tailed dunnart
Spermatogonia	Spermatogonia	1294.39	9.84	34.5	0.597299	Fat-tailed dunnart
Spermatogonia	Spermatogonia	1035.69	16.41	46	0.796399	Fat-tailed dunnart
Spermatogonia	Spermatogonia	1060.37	16.17	35	0.605956	Fat-tailed dunnart
Spermatogonia	Spermatogonia	304.44	16.88	24	0.415512	Fat-tailed dunnart
Spermatogonia	Spermatogonia	351.11	17	26	0.450139	Fat-tailed dunnart
Spermatogonia	Spermatogonia	11060.7	37.11	80	1.38504	Fat-tailed dunnart
Spermatogonia	Spermatogonia	303.8	22.29	25	0.432825	Fat-tailed dunnart
Spermatogonia	Spermatogonia	941.96	16.59	41	0.709834	Fat-tailed dunnart
Spermatogonia	Spermatogonia	529.935	7.69	21	0.363573	Fat-tailed dunnart
Spermatogonia	Spermatogonia	529.935	7.69	21	0.363573	Fat-tailed dunnart
Spermatogonia	Spermatogonia	332.22	14.5	25	0.432825	Fat-tailed dunnart
Spermatogonia	Spermatogonia	2031.48	19.77	35	0.605956	Fat-tailed dunnart
Spermatogonia	Spermatogonia	361.9	18.71	31	0.536704	Fat-tailed dunnart
Spermatogonia	Spermatogonia	582.86	20.86	30	0.519391	Fat-tailed dunnart
Spermatogonia	Spermatogonia	307.78	14.5	23	0.398199	Fat-tailed dunnart
Spermatogonia	Spermatogonia	472.3	14.82	31	0.536704	Fat-tailed dunnart
Spermatogonia	Spermatogonia	1679.03	17.19	45	0.779086	Fat-tailed dunnart
Spermatogonia	Spermatogonia	2340.44	17.8	36	0.623269	Fat-tailed dunnart
Spermatogonia	Spermatogonia	2211.2	18.65	29	0.502078	Fat-tailed dunnart
Spermatogonia	Spermatogonia	918.03	14.88	27	0.467452	Fat-tailed dunnart
Spermatogonia	Spermatogonia	635.24	19.57	30	0.519391	Fat-tailed dunnart
Spermatogonia	Spermatogonia	4296.37	26.98	56	0.969529	Fat-tailed dunnart
Spermatogonia	Spermatogonia	4597.63	23.63	38	0.657895	Fat-tailed dunnart
Spermatogonia	Spermatogonia	1802.94	20.68	29	0.502078	Fat-tailed dunnart
Spermatogonia	Spermatogonia	1367.78	17.5	51	0.882964	Fat-tailed dunnart
Spermatogonia	Spermatogonia	907.94	16.36	32	0.554017	Fat-tailed dunnart
Spermatogonia	Spermatogonia	600	19.08	26	0.450139	Fat-tailed dunnart
Spermatogonia	Spermatogonia	3547.47	13.07	34	0.588643	Fat-tailed dunnart
Spermatogonia	Spermatogonia	3547.47	13.07	34	0.588643	Fat-tailed dunnart
Spermatogonia	Spermatogonia	1242.06	27.04	30	0.519391	Fat-tailed dunnart
Spermatogonia	Spermatogonia	695.24	15.07	30	0.519391	Fat-tailed dunnart
Spermatogonia	Spermatogonia	1143.93	33.12	28	0.484765	Fat-tailed dunnart
Spermatogonia	Spermatogonia	245.45	17.23	20	0.34626	Fat-tailed dunnart
Spermatogonia	Spermatogonia	3310.93	23.92	47	0.813712	Fat-tailed dunnart
Spermatogonia	Spermatogonia	590.56	17.06	36	0.623269	Fat-tailed dunnart
Spermatogonia	Spermatogonia	1140	22.5	36	0.623269	Fat-tailed dunnart
Spermatogonia	Spermatogonia	1278.41	18.93	32	0.554017	Fat-tailed dunnart
Spermatogonia	Spermatogonia	802.54	17.46	32	0.554017	Fat-tailed dunnart
Spermatogonia	Spermatogonia	714.87	21.31	27	0.467452	Fat-tailed dunnart
Spermatogonia	Spermatogonia	1036.58	15.77	28	0.484765	Fat-tailed dunnart
Spermatogonia	Spermatogonia	1864.44	24	33	0.57133	Fat-tailed dunnart
Spermatogonia	Spermatogonia	1807.97	18.18	42	0.727147	Fat-tailed dunnart
Spermatogonia	Spermatogonia	711.62	16.88	28	0.484765	Fat-tailed dunnart
Spermatogonia	Spermatogonia	933.02	21.36	34	0.588643	Fat-tailed dunnart
Spermatogonia	Spermatogonia	4971.11	28.5	58	1.00416	Fat-tailed dunnart
Spermatogonia	Spermatogonia	322.22	19	26	0.450139	Fat-tailed dunnart
Spermatogonia	Spermatogonia	333.93	18.27	25	0.432825	Fat-tailed dunnart
Spermatogonia	Spermatogonia	4907.65	24.44	53	0.91759	Fat-tailed dunnart
Spermatogonia	Spermatogonia	2291.56	22.2	39	0.675208	Fat-tailed dunnart
Spermatogonia	Spermatogonia	1686.39	16.31	42	0.727147	Fat-tailed dunnart
Spermatogonia	Spermatogonia	612.68	17.91	42	0.727147	Fat-tailed dunnart
Spermatogonia	Spermatogonia	1484.05	19.35	43	0.74446	Fat-tailed dunnart
Spermatogonia	Spermatogonia	567.04	16.17	35	0.605956	Fat-tailed dunnart
Spermatogonia	Spermatogonia	1100.74	18.83	38	0.657895	Fat-tailed dunnart
Spermatogonia	Spermatogonia	2373.78	24.63	36	0.623269	Fat-tailed dunnart
Spermatogonia	Spermatogonia	1060.69	17.81	39	0.675208	Fat-tailed dunnart
Spermatogonia	Spermatogonia	1281.78	15.87	36	0.623269	Fat-tailed dunnart
Spermatogonia	Spermatogonia	951.11	8.165	31.5	0.54536	Fat-tailed dunnart
Spermatogonia	Spermatogonia	951.11	8.165	31.5	0.54536	Fat-tailed dunnart
Spermatogonia	Spermatogonia	767.64	15.09	38	0.657895	Fat-tailed dunnart
Spermatogonia	Spermatogonia	1684.58	16.41	46	0.796399	Fat-tailed dunnart
Spermatogonia	Spermatogonia	282.13	14.04	25	0.432825	Fat-tailed dunnart
Spermatogonia	Spermatogonia	1498.43	17.06	46	0.796399	Fat-tailed dunnart
Spermatogonia	Spermatogonia	1528.76	18.12	43	0.74446	Fat-tailed dunnart
Spermatogonia	Spermatogonia	655.04	16.08	29	0.502078	Fat-tailed dunnart
Spermatogonia	Spermatogonia	1626.01	7.07667	30	0.519391	Fat-tailed dunnart
Spermatogonia	Spermatogonia	1626.01	7.07667	30	0.519391	Fat-tailed dunnart
Spermatogonia	Spermatogonia	1626.01	7.07667	30	0.519391	Fat-tailed dunnart
Spermatogonia	Spermatogonia	395.9	18.62	29	0.502078	Fat-tailed dunnart
Spermatogonia	Spermatogonia	327.86	18.73	28	0.484765	Fat-tailed dunnart
Spermatogonia	Spermatogonia	1087.71	16.22	39	0.675208	Fat-tailed dunnart
Spermatogonia	Spermatogonia	1005.84	9.315	27	0.467452	Fat-tailed dunnart
Spermatogonia	Spermatogonia	1005.84	9.315	27	0.467452	Fat-tailed dunnart
Spermatogonia	Spermatogonia	3395.93	21.39	51	0.882964	Fat-tailed dunnart
Spermatogonia	Spermatogonia	704.07	17.03	35	0.605956	Fat-tailed dunnart
Spermatogonia	Spermatogonia	404.44	20.38	24	0.415512	Fat-tailed dunnart
Spermatogonia	Spermatogonia	2277.97	15.56	41	0.709834	Fat-tailed dunnart
Spermatogonia	Spermatogonia	1306.3	18.43	35	0.605956	Fat-tailed dunnart
Spermatogonia	Spermatogonia	1735.63	16.32	31	0.536704	Fat-tailed dunnart
Spermatogonia	Spermatogonia	1899.08	20.44	44	0.761773	Fat-tailed dunnart
Spermatogonia	Spermatogonia	1847.89	17.76	53	0.91759	Fat-tailed dunnart
Spermatogonia	Spermatogonia	1096.51	24.86	31	0.536704	Fat-tailed dunnart
Spermatogonia	Spermatogonia	2380.89	17.7	38	0.657895	Fat-tailed dunnart
Spermatogonia	Spermatogonia	5437.96	28.86	51	0.882964	Fat-tailed dunnart
Spermatogonia	Spermatogonia	1861.43	19.39	34	0.588643	Fat-tailed dunnart
Spermatogonia	Spermatogonia	1222.48	16.09	44	0.761773	Fat-tailed dunnart
Spermatogonia	Spermatogonia	1237.61	24.54	28	0.484765	Fat-tailed dunnart
Spermatogonia	Spermatogonia	742.86	16.93	32	0.554017	Fat-tailed dunnart
Spermatogonia	Spermatogonia	1886.67	16	32	0.554017	Fat-tailed dunnart
Spermatogonia	Spermatogonia	1392.14	16.85	29	0.502078	Fat-tailed dunnart
Spermatogonia	Spermatogonia	348.73	15.54	30	0.519391	Fat-tailed dunnart
Spermatogonia	Spermatogonia	1187.78	20.1	35	0.605956	Fat-tailed dunnart
Spermatogonia	Spermatogonia	256.3	16.33	23	0.398199	Fat-tailed dunnart
Spermatogonia	Spermatogonia	977.38	20.39	31	0.536704	Fat-tailed dunnart
Spermatogonia	Spermatogonia	1301.27	22.86	32	0.554017	Fat-tailed dunnart
Spermatogonia	Spermatogonia	2467.54	18.32	33	0.57133	Fat-tailed dunnart
Spermatogonia	Spermatogonia	1637.04	19.07	35	0.605956	Fat-tailed dunnart
Spermatogonia	Spermatogonia	1245.56	17.9	35	0.605956	Fat-tailed dunnart
Spermatogonia	Spermatogonia	1818.33	15.75	33	0.57133	Fat-tailed dunnart
Spermatogonia	Spermatogonia	1568.56	18.74	41	0.709834	Fat-tailed dunnart
Spermatogonia	Spermatogonia	891.11	20.75	32	0.554017	Fat-tailed dunnart
Spermatogonia	Spermatogonia	1358.56	16.62	48	0.831025	Fat-tailed dunnart
Spermatogonia	Spermatogonia	269.44	19.13	22	0.380886	Fat-tailed dunnart
Spermatogonia	Spermatogonia	1267.69	17.77	28	0.484765	Fat-tailed dunnart
Spermatogonia	Spermatogonia	2493.33	18	34	0.588643	Fat-tailed dunnart
Spermatogonia	Spermatogonia	1247.3	15.43	32	0.554017	Fat-tailed dunnart
Spermatogonia	Spermatogonia	626.67	16.81	26	0.450139	Fat-tailed dunnart
Spermatogonia	Spermatogonia	975	17.75	31	0.536704	Fat-tailed dunnart
Spermatogonia	Spermatogonia	2014.32	32.87	87	1.50623	Fat-tailed dunnart
Spermatogonia	Spermatogonia	1303.49	16.61	32	0.554017	Fat-tailed dunnart
Spermatogonia	Spermatogonia	1834.6	18.11	32	0.554017	Fat-tailed dunnart
Spermatogonia	Spermatogonia	1254.87	18.15	28	0.484765	Fat-tailed dunnart
Spermatogonia	Spermatogonia	1886.03	21.86	33	0.57133	Fat-tailed dunnart
Spermatogonia	Spermatogonia	1659.41	16.07	34	0.588643	Fat-tailed dunnart
Spermatogonia	Spermatogonia	1315.56	16.75	32	0.554017	Fat-tailed dunnart
Spermatogonia	Spermatogonia	1673.33	18	33	0.57133	Fat-tailed dunnart
Spermatogonia	Spermatogonia	2579.05	23.61	32	0.554017	Fat-tailed dunnart
Spermatogonia	Spermatogonia	1480.83	21.63	25	0.432825	Fat-tailed dunnart
Spermatogonia	Spermatogonia	1885.19	19.53	35	0.605956	Fat-tailed dunnart
Spermatogonia	Spermatogonia	1524.53	19.65	29	0.502078	Fat-tailed dunnart
Spermatogonia	Spermatogonia	1685.56	20.5	31	0.536704	Fat-tailed dunnart
Spermatogonia	Spermatogonia	1756.98	18.07	33	0.57133	Fat-tailed dunnart
Spermatogonia	Spermatogonia	1327.35	16.85	28	0.484765	Fat-tailed dunnart
Spermatogonia	Spermatogonia	2319.32	25.65	28	0.484765	Fat-tailed dunnart
Spermatogonia	Spermatogonia	2495.24	19.54	32	0.554017	Fat-tailed dunnart
Spermatogonia	Spermatogonia	1849.29	21.61	31	0.536704	Fat-tailed dunnart
Spermatogonia	Spermatogonia	1738.13	25.97	37	0.640582	Fat-tailed dunnart
Spermatogonia	Spermatogonia	1665.08	21.18	32	0.554017	Fat-tailed dunnart
Spermatogonia	Spermatogonia	1278.47	16.19	41	0.709834	Fat-tailed dunnart
Spermatogonia	Spermatogonia	1255.56	29.5	42	0.727147	Fat-tailed dunnart
Spermatogonia	Spermatogonia	862.78	34.75	29	0.502078	Fat-tailed dunnart
Spermatogonia	Spermatogonia	1574.6	22.36	32	0.554017	Fat-tailed dunnart
Spermatogonia	Spermatogonia	1097.29	19.03	39	0.675208	Fat-tailed dunnart
Spermatogonia	Spermatogonia	382.22	14.27	26	0.450139	Fat-tailed dunnart
Spermatogonia	Spermatogonia	2067.85	18.07	37	0.640582	Fat-tailed dunnart
Spermatogonia	Spermatogonia	791.88	19.65	27	0.467452	Fat-tailed dunnart
Spermatogonia	Spermatogonia	603.54	22.28	37	0.640582	Fat-tailed dunnart
Spermatogonia	Spermatogonia	795.56	15.73	26	0.450139	Fat-tailed dunnart
Spermatogonia	Spermatogonia	396.84	17.42	27	0.467452	Fat-tailed dunnart
Spermatogonia	Spermatogonia	474.44	18.7	35	0.605956	Fat-tailed dunnart
Spermatogonia	Spermatogonia	362.06	23.04	30	0.519391	Fat-tailed dunnart
Spermatogonia	Spermatogonia	1482	18.67	52	0.900277	Fat-tailed dunnart
Spermatogonia	Spermatogonia	1090.16	21.21	30	0.519391	Fat-tailed dunnart
Spermatogonia	Spermatogonia	1285.56	18.19	40	0.692521	Fat-tailed dunnart
Spermatogonia	Spermatogonia	1124.89	17.47	36	0.623269	Fat-tailed dunnart
Spermatogonia	Spermatogonia	776.25	21.94	37	0.640582	Fat-tailed dunnart
Spermatogonia	Spermatogonia	1160.49	15.06	50	0.865651	Fat-tailed dunnart
Spermatogonia	Spermatogonia	658.52	23.93	35	0.605956	Fat-tailed dunnart
Spermatogonia	Spermatogonia	2410.06	22.61	52	0.900277	Fat-tailed dunnart
Spermatogonia	Spermatogonia	448.97	23.96	29	0.502078	Fat-tailed dunnart
Spermatogonia	Spermatogonia	650.52	17.47	37	0.640582	Fat-tailed dunnart
Spermatogonia	Spermatogonia	322.74	23.88	28	0.484765	Fat-tailed dunnart
Spermatogonia	Spermatogonia	385.13	22.35	28	0.484765	Fat-tailed dunnart
Spermatogonia	Spermatogonia	2480.71	24.54	33	0.57133	Fat-tailed dunnart
Spermatogonia	Spermatogonia	1825.56	17.5	35	0.605956	Fat-tailed dunnart
Spermatogonia	Spermatogonia	558.57	16.21	31	0.536704	Fat-tailed dunnart
Spermatogonia	Spermatogonia	908.15	16.87	35	0.605956	Fat-tailed dunnart
Spermatogonia	Spermatogonia	592.09	14.62	43	0.74446	Fat-tailed dunnart
Spermatogonia	Spermatogonia	2140	16	58	1.00416	Fat-tailed dunnart
Spermatogonia	Spermatogonia	733.33	21.33	24	0.415512	Fat-tailed dunnart
Spermatogonia	Spermatogonia	393.85	14.88	28	0.484765	Fat-tailed dunnart
Spermatogonia	Spermatogonia	1138.22	17.3	36	0.623269	Fat-tailed dunnart
Spermatogonia	Spermatogonia	937.84	21.44	43	0.74446	Fat-tailed dunnart
Spermatogonia	Spermatogonia	754.67	21.23	36	0.623269	Fat-tailed dunnart
Spermatogonia	Spermatogonia	499.05	21.61	32	0.554017	Fat-tailed dunnart
Spermatogonia	Spermatogonia	325.16	17.68	29	0.502078	Fat-tailed dunnart
Spermatogonia	Spermatogonia	535.56	28.42	24	0.415512	Fat-tailed dunnart
Spermatogonia	Spermatogonia	2681.7	29.35	46	0.796399	Fat-tailed dunnart
Spermatogonia	Spermatogonia	928.63	17.04	29	0.502078	Fat-tailed dunnart
Spermatogonia	Spermatogonia	728.02	21.46	31	0.536704	Fat-tailed dunnart
Spermatogonia	Spermatogonia	364.44	28.23	26	0.450139	Fat-tailed dunnart
Spermatogonia	Spermatogonia	741.27	17.36	32	0.554017	Fat-tailed dunnart
Spermatogonia	Spermatogonia	563.17	19.86	31	0.536704	Fat-tailed dunnart
Spermatogonia	Spermatogonia	1184.13	16.86	34	0.588643	Fat-tailed dunnart
Spermatogonia	Spermatogonia	3230.42	25.6	61	1.05609	Fat-tailed dunnart
Spermatogonia	Spermatogonia	320.77	25.35	25	0.432825	Fat-tailed dunnart
Spermatogonia	Spermatogonia	2247.35	21.23	29	0.502078	Fat-tailed dunnart
Spermatogonia	Spermatogonia	459.26	24.33	34	0.588643	Fat-tailed dunnart
Spermatogonia	Spermatogonia	1370.31	8.805	23.5	0.406856	Fat-tailed dunnart
Spermatogonia	Spermatogonia	1370.31	8.805	23.5	0.406856	Fat-tailed dunnart
Spermatogonia	Spermatogonia	1977.94	23.64	31	0.536704	Fat-tailed dunnart
Spermatogonia	Spermatogonia	912.48	16.38	27	0.467452	Fat-tailed dunnart
Spermatogonia	Spermatogonia	735.845	8.49	26.5	0.458795	Fat-tailed dunnart
Spermatogonia	Spermatogonia	735.845	8.49	26.5	0.458795	Fat-tailed dunnart
Spermatogonia	Spermatogonia	9853.08	31.84	73	1.26385	Fat-tailed dunnart
Spermatogonia	Spermatogonia	1322.56	17.92	28	0.484765	Fat-tailed dunnart
Spermatogonia	Spermatogonia	1272.5	19.09	36	0.623269	Fat-tailed dunnart
Spermatogonia	Spermatogonia	528.89	20.63	24	0.415512	Fat-tailed dunnart
Spermatogonia	Spermatogonia	3729.6	11.52	39.5	0.683864	Fat-tailed dunnart
Spermatogonia	Spermatogonia	3729.6	11.52	39.5	0.683864	Fat-tailed dunnart
Spermatogonia	Spermatogonia	779.83	18.54	28	0.484765	Fat-tailed dunnart
Spermatogonia	Spermatogonia	3285.88	22.71	43	0.74446	Fat-tailed dunnart
Spermatogonia	Spermatogonia	614.92	18.43	31	0.536704	Fat-tailed dunnart
Spermatogonia	Spermatogonia	1247.95	11.265	25.5	0.441482	Fat-tailed dunnart
Spermatogonia	Spermatogonia	1247.95	11.265	25.5	0.441482	Fat-tailed dunnart
Spermatogonia	Spermatogonia	7041.48	28.33	52	0.900277	Fat-tailed dunnart
Spermatogonia	Spermatogonia	2604.44	20.75	56	0.969529	Fat-tailed dunnart
Spermatogonia	Spermatogonia	673.99	16.59	42	0.727147	Fat-tailed dunnart
Spermatogonia	Spermatogonia	256.39	18.38	23	0.398199	Fat-tailed dunnart
Spermatogonia	Spermatogonia	861.96	15.91	44	0.761773	Fat-tailed dunnart
Spermatogonia	Spermatogonia	540.56	17.75	25	0.432825	Fat-tailed dunnart
Spermatogonia	Spermatogonia	1848.89	21.2	35	0.605956	Fat-tailed dunnart
Spermatogonia	Spermatogonia	1141.51	20.11	31	0.536704	Fat-tailed dunnart
Spermatogonia	Spermatogonia	1642.15	27.43	37	0.640582	Fat-tailed dunnart
Spermatogonia	Spermatogonia	4930.56	35.13	42	0.727147	Fat-tailed dunnart
Spermatogonia	Spermatogonia	2699.02	25.38	43	0.74446	Fat-tailed dunnart
Spermatogonia	Spermatogonia	695.08	21.07	31	0.536704	Fat-tailed dunnart
Spermatogonia	Spermatogonia	623.15	16.58	25	0.432825	Fat-tailed dunnart
Spermatogonia	Spermatogonia	1575.56	18.5	34	0.588643	Fat-tailed dunnart
Spermatogonia	Spermatogonia	1846.42	20.78	49	0.848338	Fat-tailed dunnart
Spermatogonia	Spermatogonia	1421.04	25.28	41	0.709834	Fat-tailed dunnart
Spermatogonia	Spermatogonia	573.08	23.12	27	0.467452	Fat-tailed dunnart
Spermatogonia	Spermatogonia	2024.76	28.46	32	0.554017	Fat-tailed dunnart
Spermatogonia	Spermatogonia	1537.33	16.6	47	0.813712	Fat-tailed dunnart
Spermatogonia	Spermatogonia	978.22	22.6	33	0.57133	Fat-tailed dunnart
Spermatogonia	Spermatogonia	5161.94	30.59	44	0.761773	Fat-tailed dunnart
Spermatogonia	Spermatogonia	4048	23.6	39	0.675208	Fat-tailed dunnart
Spermatogonia	Spermatogonia	489.9	19.23	20	0.34626	Fat-tailed dunnart
Spermatogonia	Spermatogonia	426.67	17.25	32	0.554017	Fat-tailed dunnart
Spermatogonia	Spermatogonia	3046.67	25.13	40	0.692521	Fat-tailed dunnart
Spermatogonia	Spermatogonia	520	21.21	24	0.415512	Fat-tailed dunnart
Spermatogonia	Spermatogonia	762.22	17	30	0.519391	Fat-tailed dunnart
Spermatogonia	Spermatogonia	1323.06	19.44	38	0.657895	Fat-tailed dunnart
Spermatogonia	Spermatogonia	1229.91	18.85	29	0.502078	Fat-tailed dunnart
Spermatogonia	Spermatogonia	618.17	16.61	31	0.536704	Fat-tailed dunnart
Spermatogonia	Spermatogonia	3391.67	23.09	40	0.692521	Fat-tailed dunnart
Spermatogonia	Spermatogonia	367.3	15.93	32	0.554017	Fat-tailed dunnart
Spermatogonia	Spermatogonia	1929.65	19.41	41	0.709834	Fat-tailed dunnart
Spermatogonia	Spermatogonia	4149.59	20.76	52	0.900277	Fat-tailed dunnart
Spermatogonia	Spermatogonia	390.6	16.23	27	0.467452	Fat-tailed dunnart
Spermatogonia	Spermatogonia	415.56	17.25	36	0.623269	Fat-tailed dunnart
Spermatogonia	Spermatogonia	9912.63	33.61	60	1.03878	Fat-tailed dunnart
Spermatogonia	Spermatogonia	475.04	21.23	27	0.467452	Fat-tailed dunnart
Spermatogonia	Spermatogonia	1058.38	23.58	29	0.502078	Fat-tailed dunnart
Spermatogonia	Spermatogonia	719.83	22.08	27	0.467452	Fat-tailed dunnart
Spermatogonia	Spermatogonia	888.335	11.845	20	0.34626	Fat-tailed dunnart
Spermatogonia	Spermatogonia	888.335	11.845	20	0.34626	Fat-tailed dunnart
Spermatogonia	Spermatogonia	1854.92	22.43	31	0.536704	Fat-tailed dunnart
Spermatogonia	Spermatogonia	774.72	9.82	22.5	0.389543	Fat-tailed dunnart
Spermatogonia	Spermatogonia	774.72	9.82	22.5	0.389543	Fat-tailed dunnart
Spermatogonia	Spermatogonia	875.555	10	22	0.380886	Fat-tailed dunnart
Spermatogonia	Spermatogonia	875.555	10	22	0.380886	Fat-tailed dunnart
Spermatogonia	Spermatogonia	1487.94	22.86	32	0.554017	Fat-tailed dunnart
Spermatogonia	Spermatogonia	1175.34	9.735	23.5	0.406856	Fat-tailed dunnart
Spermatogonia	Spermatogonia	1175.34	9.735	23.5	0.406856	Fat-tailed dunnart
Spermatogonia	Spermatogonia	960.99	20.56	46	0.796399	Fat-tailed dunnart
Spermatogonia	Spermatogonia	2344.13	22.79	32	0.554017	Fat-tailed dunnart
Spermatogonia	Spermatogonia	1160.89	21.9	34	0.588643	Fat-tailed dunnart
Spermatogonia	Spermatogonia	1601.2	24.23	28	0.484765	Fat-tailed dunnart
Spermatogonia	Spermatogonia	1471.11	22	44	0.761773	Fat-tailed dunnart
Spermatogonia	Spermatogonia	315.35	21.95	20	0.34626	Fat-tailed dunnart
Spermatogonia	Spermatogonia	1891.48	22.97	35	0.605956	Fat-tailed dunnart
Spermatogonia	Spermatogonia	4421.37	24.56	49	0.848338	Fat-tailed dunnart
Spermatogonia	Spermatogonia	1189.79	26.84	41	0.709834	Fat-tailed dunnart
Spermatogonia	Spermatogonia	391.35	15.89	29	0.502078	Fat-tailed dunnart
Spermatogonia	Spermatogonia	450.77	17.15	27	0.467452	Fat-tailed dunnart
Spermatogonia	Spermatogonia	114.07	14.56	12	0.207756	Fat-tailed dunnart
Spermatogonia	Spermatogonia	965.63	15.87	34	0.588643	Fat-tailed dunnart
Spermatogonia	Spermatogonia	5230.33	29.24	44	0.761773	Fat-tailed dunnart
Spermatogonia	Spermatogonia	7562.22	26.1	63	1.09072	Fat-tailed dunnart
Spermatogonia	Spermatogonia	716.11	25.75	25	0.432825	Fat-tailed dunnart
Spermatogonia	Spermatogonia	3370.56	22.75	63	1.09072	Fat-tailed dunnart
Spermatogonia	Spermatogonia	148.89	14.8	15	0.259695	Fat-tailed dunnart
Spermatogonia	Spermatogonia	1247.95	14.95	49	0.848338	Fat-tailed dunnart
Spermatogonia	Spermatogonia	553.33	14.46	24	0.415512	Fat-tailed dunnart
Spermatogonia	Spermatogonia	2318.89	19.44	40	0.692521	Fat-tailed dunnart
Spermatogonia	Spermatogonia	2313.39	16.17	57	0.986842	Fat-tailed dunnart
Spermatogonia	Spermatogonia	268.15	16.33	22	0.380886	Fat-tailed dunnart
Spermatogonia	Spermatogonia	2080	18	40	0.692521	Fat-tailed dunnart
Spermatogonia	Spermatogonia	184.44	17	19	0.328947	Fat-tailed dunnart
Spermatogonia	Spermatogonia	394.62	16.42	27	0.467452	Fat-tailed dunnart
Spermatogonia	Spermatogonia	162.63	15.05	18	0.311634	Fat-tailed dunnart
Spermatogonia	Spermatogonia	176.11	14.45	15	0.259695	Fat-tailed dunnart
Spermatogonia	Spermatogonia	164	21.95	16	0.277008	Fat-tailed dunnart
Spermatogonia	Spermatogonia	637.78	24	30	0.519391	Fat-tailed dunnart
Spermatogonia	Spermatogonia	381.11	25.5	23	0.398199	Fat-tailed dunnart
Spermatogonia	Spermatogonia	202.41	33.04	22	0.380886	Fat-tailed dunnart
Spermatogonia	Spermatogonia	10134.4	31.1	85	1.47161	Fat-tailed dunnart
Spermatogonia	Spermatogonia	1132.22	16.5	31	0.536704	Fat-tailed dunnart
Spermatogonia	Spermatogonia	480.77	15.65	27	0.467452	Fat-tailed dunnart
Spermatogonia	Spermatogonia	1347.62	27.89	32	0.554017	Fat-tailed dunnart
Spermatogonia	Spermatogonia	734.72	22.63	23	0.398199	Fat-tailed dunnart
Spermatogonia	Spermatogonia	5715.56	41.05	57	0.986842	Fat-tailed dunnart
Spermatogonia	Spermatogonia	759.07	45.58	23	0.398199	Fat-tailed dunnart
Spermatogonia	Spermatogonia	197.78	47	15	0.259695	Fat-tailed dunnart
Spermatogonia	Spermatogonia	1079.11	30.7	32	0.554017	Fat-tailed dunnart
Spermatogonia	Spermatogonia	250.56	20.15	15	0.259695	Fat-tailed dunnart
Spermatogonia	Spermatogonia	1109.84	31.86	31	0.536704	Fat-tailed dunnart
Spermatogonia	Spermatogonia	1848.89	24.17	36	0.623269	Fat-tailed dunnart
Spermatogonia	Spermatogonia	535.56	23.62	26	0.450139	Fat-tailed dunnart
Spermatogonia	Spermatogonia	989.05	22.93	29	0.502078	Fat-tailed dunnart
Spermatogonia	Spermatogonia	2140.24	30.18	33	0.57133	Fat-tailed dunnart
Spermatogonia	Spermatogonia	791.35	28.89	29	0.502078	Fat-tailed dunnart
Spermatogonia	Spermatogonia	908.89	24.04	26	0.450139	Fat-tailed dunnart
Spermatogonia	Spermatogonia	2552.89	26.73	33	0.57133	Fat-tailed dunnart
Spermatogonia	Spermatogonia	736.11	21.25	23	0.398199	Fat-tailed dunnart
Spermatogonia	Spermatogonia	618.89	34.17	21	0.363573	Fat-tailed dunnart
Spermatogonia	Spermatogonia	1104.44	30.88	26	0.450139	Fat-tailed dunnart
Spermatogonia	Spermatogonia	1170.96	21.27	34	0.588643	Fat-tailed dunnart
Spermatogonia	Spermatogonia	1116.51	23.29	30	0.519391	Fat-tailed dunnart
Spermatogonia	Spermatogonia	677.78	21.31	26	0.450139	Fat-tailed dunnart
Spermatogonia	Spermatogonia	359.44	19.92	21	0.363573	Fat-tailed dunnart
Spermatogonia	Spermatogonia	258.33	19.85	15	0.259695	Fat-tailed dunnart
Spermatogonia	Spermatogonia	2187.38	24.89	31	0.536704	Fat-tailed dunnart
Spermatogonia	Spermatogonia	244.44	22	15	0.259695	Fat-tailed dunnart
Spermatogonia	Spermatogonia	333.94	22.82	18	0.311634	Fat-tailed dunnart
Spermatogonia	Spermatogonia	2176.67	25.5	27	0.467452	Fat-tailed dunnart
Spermatogonia	Spermatogonia	2377.59	31.08	25	0.432825	Fat-tailed dunnart
Spermatogonia	Spermatogonia	1050.09	40.54	25	0.432825	Fat-tailed dunnart
Spermatogonia	Spermatogonia	653.52	29.04	22	0.380886	Fat-tailed dunnart
Spermatogonia	Spermatogonia	289.09	53.27	18	0.311634	Fat-tailed dunnart
Spermatogonia	Spermatogonia	1996.07	44.38	28	0.484765	Fat-tailed dunnart
Spermatogonia	Spermatogonia	658.06	117.38	33	0.57133	Fat-tailed dunnart
Spermatogonia	Spermatogonia	268.89	41.4	15	0.259695	Fat-tailed dunnart
Spermatogonia	Spermatogonia	2101.27	41.21	30	0.519391	Fat-tailed dunnart
Spermatogonia	Spermatogonia	1343.73	41.32	29	0.502078	Fat-tailed dunnart
Spermatogonia	Spermatogonia	1271.11	34.08	26	0.450139	Fat-tailed dunnart
Spermatogonia	Spermatogonia	433.75	69.91	24	0.415512	Fat-tailed dunnart
Spermatogonia	Spermatogonia	4755.1	40.91	43	0.74446	Fat-tailed dunnart
Spermatogonia	Spermatogonia	114.03	38.19	9	0.155817	Fat-tailed dunnart
Spermatogonia	Spermatogonia	1419.66	38.58	28	0.484765	Fat-tailed dunnart
Spermatogonia	Spermatogonia	1384.36	42.04	27	0.467452	Fat-tailed dunnart
Spermatogonia	Spermatogonia	633.61	32.04	21	0.363573	Fat-tailed dunnart
Spermatogonia	Spermatogonia	1300.26	32.88	27	0.467452	Fat-tailed dunnart
Spermatogonia	Spermatogonia	135.97	31.31	9	0.155817	Fat-tailed dunnart
Spermatogonia	Spermatogonia	477.17	32.68	18	0.311634	Fat-tailed dunnart
Spermatogonia	Spermatogonia	237.98	39.27	18	0.311634	Fat-tailed dunnart
Spermatogonia	Spermatogonia	500	41.4	15	0.259695	Fat-tailed dunnart
Spermatogonia	Spermatogonia	171.39	53.88	9	0.155817	Fat-tailed dunnart
Spermatogonia	Spermatogonia	112.64	34.81	9	0.155817	Fat-tailed dunnart
Spermatogonia	Spermatogonia	663.92	115.14	36	0.623269	Fat-tailed dunnart
Spermatogonia	Spermatogonia	1745.13	36.85	28	0.484765	Fat-tailed dunnart
Spermatogonia	Spermatogonia	855.37	44.46	22	0.380886	Fat-tailed dunnart
Spermatogonia	Spermatogonia	1522.78	42.75	25	0.432825	Fat-tailed dunnart
Spermatogonia	Spermatogonia	2146.22	33.87	36	0.623269	Fat-tailed dunnart
Spermatogonia	Spermatogonia	169.03	88.44	18	0.311634	Fat-tailed dunnart
Spermatogonia	Spermatogonia	1255.83	111.38	31	0.536704	Fat-tailed dunnart
Spermatogonia	Spermatogonia	416.94	104.38	18	0.311634	Fat-tailed dunnart
Spermatogonia	Spermatogonia	1170.3	49.32	20	0.34626	Fat-tailed dunnart
Spermatogonia	Spermatogonia	1267.78	104	39	0.675208	Fat-tailed dunnart
Spermatogonia	Spermatogonia	1075.97	101.19	35	0.605956	Fat-tailed dunnart
Spermatogonia	Spermatogonia	1565.53	25.09	24.5	0.424169	Fat-tailed dunnart
Spermatogonia	Spermatogonia	1565.53	25.09	24.5	0.424169	Fat-tailed dunnart
Spermatogonia	Spermatogonia	640.2	54.27	18	0.311634	Fat-tailed dunnart
Spermatogonia	Spermatogonia	1938.67	50.87	33	0.57133	Fat-tailed dunnart
Spermatogonia	Spermatogonia	1565.21	70.65	27	0.467452	Fat-tailed dunnart
Spermatogonia	Spermatogonia	1643.15	60.42	23	0.398199	Fat-tailed dunnart
Spermatogonia	Spermatogonia	1504.21	75.11	29	0.502078	Fat-tailed dunnart
Spermatogonia	Spermatogonia	2563.25	55.18	31	0.536704	Fat-tailed dunnart
Spermatogonia	Spermatogonia	1004.44	46.29	24	0.415512	Fat-tailed dunnart
Spermatogonia	Spermatogonia	1323.59	45.69	28	0.484765	Fat-tailed dunnart
Spermatogonia	Spermatogonia	3338.32	44.39	40	0.692521	Fat-tailed dunnart
Spermatogonia	Spermatogonia	1532.14	46.77	28	0.484765	Fat-tailed dunnart
Spermatogonia	Spermatogonia	1610.16	50.14	31	0.536704	Fat-tailed dunnart
Spermatogonia	Spermatogonia	4203.19	52.37	37	0.640582	Fat-tailed dunnart
Spermatogonia	Spermatogonia	1071.48	55.17	23	0.398199	Fat-tailed dunnart
Spermatogonia	Spermatogonia	1982.56	43.92	28	0.484765	Fat-tailed dunnart
Spermatogonia	Spermatogonia	2096.43	44.61	29	0.502078	Fat-tailed dunnart
Spermatogonia	Spermatogonia	882.78	47.75	21	0.363573	Fat-tailed dunnart
Spermatogonia	Spermatogonia	2520.83	51.63	25	0.432825	Fat-tailed dunnart
Spermatogonia	Spermatogonia	1918.41	49.93	32	0.554017	Fat-tailed dunnart
Spermatogonia	Spermatogonia	2172.97	24.935	26	0.450139	Fat-tailed dunnart
Spermatogonia	Spermatogonia	2172.97	24.935	26	0.450139	Fat-tailed dunnart
Spermatogonia	Spermatogonia	2066.83	49.93	29	0.502078	Fat-tailed dunnart
Spermatogonia	Spermatogonia	2380.18	24.79	23	0.398199	Fat-tailed dunnart
Spermatogonia	Spermatogonia	2380.18	24.79	23	0.398199	Fat-tailed dunnart
Spermatogonia	Spermatogonia	4275.85	49.73	38	0.657895	Fat-tailed dunnart
Spermatogonia	Spermatogonia	382.22	45.6	15	0.259695	Fat-tailed dunnart
Spermatogonia	Spermatogonia	3706.67	52	36	0.623269	Fat-tailed dunnart
Spermatogonia	Spermatogonia	1999.4	45.42	29	0.502078	Fat-tailed dunnart
Spermatogonia	Spermatogonia	217.22	44.95	15	0.259695	Fat-tailed dunnart
Spermatogonia	Spermatogonia	1336.32	47.65	27	0.467452	Fat-tailed dunnart
Spermatogonia	Spermatogonia	124.31	51.56	9	0.155817	Fat-tailed dunnart
Spermatogonia	Spermatogonia	2107.18	49.88	28	0.484765	Fat-tailed dunnart
Spermatogonia	Spermatogonia	1771.11	44.21	24	0.415512	Fat-tailed dunnart
Spermatogonia	Spermatogonia	1220.85	48.38	25	0.432825	Fat-tailed dunnart
Spermatogonia	Spermatogonia	1574.37	46.77	32	0.554017	Fat-tailed dunnart
Spermatogonia	Spermatogonia	2307.11	45.7	34	0.588643	Fat-tailed dunnart
Spermatogonia	Spermatogonia	575.56	51.75	16	0.277008	Fat-tailed dunnart
Spermatogonia	Spermatogonia	116.67	59.5	9	0.155817	Fat-tailed dunnart
Spermatogonia	Spermatogonia	1890.63	52.11	30	0.519391	Fat-tailed dunnart
Spermatogonia	Spermatogonia	3511.67	57.11	35	0.605956	Fat-tailed dunnart
Spermatogonia	Spermatogonia	2060.17	50.31	29	0.502078	Fat-tailed dunnart
Spermatogonia	Spermatogonia	1717.33	52.73	33	0.57133	Fat-tailed dunnart
Spermatogonia	Spermatogonia	1360.17	48.92	27	0.467452	Fat-tailed dunnart
Spermatogonia	Spermatogonia	366.11	47.15	15	0.259695	Fat-tailed dunnart
Spermatogonia	Spermatogonia	1184.68	50.89	29	0.502078	Fat-tailed dunnart
Spermatogonia	Spermatogonia	1391.28	48.46	28	0.484765	Fat-tailed dunnart
Spermatogonia	Spermatogonia	2047.78	56.5	25	0.432825	Fat-tailed dunnart
Spermatogonia	Spermatogonia	1733.33	44	26	0.450139	Fat-tailed dunnart
Spermatogonia	Spermatogonia	1914.76	48.68	30	0.519391	Fat-tailed dunnart
Spermatogonia	Spermatogonia	992.96	50.92	22	0.380886	Fat-tailed dunnart
Spermatogonia	Spermatogonia	2847.61	44.19	29	0.502078	Fat-tailed dunnart
Spermatogonia	Spermatogonia	2259.4	36.42	29	0.502078	Fat-tailed dunnart
Spermatogonia	Spermatogonia	1252.86	35.07	31	0.536704	Fat-tailed dunnart
Spermatogonia	Spermatogonia	1904.07	34.63	35	0.605956	Fat-tailed dunnart
Spermatogonia	Spermatogonia	1877.95	35.96	28	0.484765	Fat-tailed dunnart
Spermatogonia	Spermatogonia	990.94	37.04	28	0.484765	Fat-tailed dunnart
Spermatogonia	Spermatogonia	606.67	60.38	26	0.450139	Fat-tailed dunnart
Spermatogonia	Spermatogonia	2498.97	51.89	33	0.57133	Fat-tailed dunnart
Spermatogonia	Spermatogonia	1260.32	34.46	32	0.554017	Fat-tailed dunnart
Spermatogonia	Spermatogonia	1561.59	37.07	32	0.554017	Fat-tailed dunnart
Spermatogonia	Spermatogonia	2749.91	41.85	29	0.502078	Fat-tailed dunnart
Spermatogonia	Spermatogonia	1712.39	38.42	27	0.467452	Fat-tailed dunnart
Spermatogonia	Spermatogonia	2179.32	41.15	28	0.484765	Fat-tailed dunnart
Spermatogonia	Spermatogonia	1757.78	40.62	26	0.450139	Fat-tailed dunnart
Spermatogonia	Spermatogonia	1192.7	34.82	32	0.554017	Fat-tailed dunnart
Spermatogonia	Spermatogonia	354.04	37.77	19	0.328947	Fat-tailed dunnart
Spermatogonia	Spermatogonia	2238.41	39.68	32	0.554017	Fat-tailed dunnart
Spermatogonia	Spermatogonia	949.53	19.435	25	0.432825	Fat-tailed dunnart
Spermatogonia	Spermatogonia	949.53	19.435	25	0.432825	Fat-tailed dunnart
Spermatogonia	Spermatogonia	993.33	38.04	26	0.450139	Fat-tailed dunnart
Spermatogonia	Spermatogonia	285	37.65	15	0.259695	Fat-tailed dunnart
Spermatogonia	Spermatogonia	1604.07	37.03	35	0.605956	Fat-tailed dunnart
Spermatogonia	Spermatogonia	2009.05	38.46	30	0.519391	Fat-tailed dunnart
Spermatogonia	Spermatogonia	1797.31	43.21	25	0.432825	Fat-tailed dunnart
Spermatogonia	Spermatogonia	1520	40	31	0.536704	Fat-tailed dunnart
Spermatogonia	Spermatogonia	2868.41	41.64	33	0.57133	Fat-tailed dunnart
Spermatogonia	Spermatogonia	990.37	34.33	25	0.432825	Fat-tailed dunnart
Spermatogonia	Spermatogonia	907.35	33.69	27	0.467452	Fat-tailed dunnart
Spermatogonia	Spermatogonia	1324.97	24.82	41	0.709834	Fat-tailed dunnart
Spermatogonia	Spermatogonia	1615.37	14.97	25.5	0.441482	Fat-tailed dunnart
Spermatogonia	Spermatogonia	1615.37	14.97	25.5	0.441482	Fat-tailed dunnart
Spermatogonia	Spermatogonia	1659.74	14.1267	16	0.277008	Fat-tailed dunnart
Spermatogonia	Spermatogonia	1659.74	14.1267	16	0.277008	Fat-tailed dunnart
Spermatogonia	Spermatogonia	1659.74	14.1267	16	0.277008	Fat-tailed dunnart
Spermatogonia	Spermatogonia	4169.03	13.0633	31.6667	0.548246	Fat-tailed dunnart
Spermatogonia	Spermatogonia	4169.03	13.0633	31.6667	0.548246	Fat-tailed dunnart
Spermatogonia	Spermatogonia	4169.03	13.0633	31.6667	0.548246	Fat-tailed dunnart
Spermatogonia	Spermatogonia	1490.93	13.755	24.5	0.424169	Fat-tailed dunnart
Spermatogonia	Spermatogonia	1490.93	13.755	24.5	0.424169	Fat-tailed dunnart
Spermatogonia	Spermatogonia	964.44	37.58	26	0.450139	Fat-tailed dunnart
Spermatogonia	Spermatogonia	915.24	35.07	30	0.519391	Fat-tailed dunnart
Spermatogonia	Spermatogonia	2438.33	39.75	41	0.709834	Fat-tailed dunnart
Spermatogonia	Spermatogonia	757.09	33.31	27	0.467452	Fat-tailed dunnart
Spermatogonia	Spermatogonia	2946.98	33.21	32	0.554017	Fat-tailed dunnart
Spermatogonia	Spermatogonia	1278.41	33.18	32	0.554017	Fat-tailed dunnart
Spermatogonia	Spermatogonia	1624.05	29.65	42	0.727147	Fat-tailed dunnart
Spermatogonia	Spermatogonia	3605.69	33.38	43	0.74446	Fat-tailed dunnart
Spermatogonia	Spermatogonia	156.25	15.94	10.5	0.181787	Fat-tailed dunnart
Spermatogonia	Spermatogonia	156.25	15.94	10.5	0.181787	Fat-tailed dunnart
Spermatogonia	Spermatogonia	2264.44	28.17	36	0.623269	Fat-tailed dunnart
Spermatogonia	Spermatogonia	8962.22	41	72	1.24654	Fat-tailed dunnart
Spermatogonia	Spermatogonia	1617.35	15.86	24.5	0.424169	Fat-tailed dunnart
Spermatogonia	Spermatogonia	1617.35	15.86	24.5	0.424169	Fat-tailed dunnart
Spermatogonia	Spermatogonia	830.32	29.18	30	0.519391	Fat-tailed dunnart
Spermatogonia	Spermatogonia	1628.89	30.75	32	0.554017	Fat-tailed dunnart
Spermatogonia	Spermatogonia	2033.57	30.96	31	0.536704	Fat-tailed dunnart
Spermatogonia	Spermatogonia	2268.72	33.04	28	0.484765	Fat-tailed dunnart
Spermatogonia	Spermatogonia	2233.33	31.33	36	0.623269	Fat-tailed dunnart
Spermatogonia	Spermatogonia	3638.89	33.19	40	0.692521	Fat-tailed dunnart
Spermatogonia	Spermatogonia	2753.56	20.34	23.5	0.406856	Fat-tailed dunnart
Spermatogonia	Spermatogonia	2753.56	20.34	23.5	0.406856	Fat-tailed dunnart
Spermatogonia	Spermatogonia	2183.12	17.345	20.5	0.354917	Fat-tailed dunnart
Spermatogonia	Spermatogonia	2183.12	17.345	20.5	0.354917	Fat-tailed dunnart
Spermatogonia	Spermatogonia	931.28	27.92	27	0.467452	Fat-tailed dunnart
Spermatogonia	Spermatogonia	954.87	28.15	28	0.484765	Fat-tailed dunnart
Spermatogonia	Spermatogonia	2586.67	30.75	32	0.554017	Fat-tailed dunnart
Spermatogonia	Spermatogonia	949.06	28.92	27	0.467452	Fat-tailed dunnart
Spermatogonia	Spermatogonia	3475.83	32.88	41	0.709834	Fat-tailed dunnart
Spermatogonia	Spermatogonia	1028.89	29.33	24	0.415512	Fat-tailed dunnart
Spermatogonia	Spermatogonia	3454.65	34.34	39	0.675208	Fat-tailed dunnart
Spermatogonia	Spermatogonia	2130.37	30.33	37	0.640582	Fat-tailed dunnart
Spermatogonia	Spermatogonia	1252.7	27.64	30	0.519391	Fat-tailed dunnart
Spermatogonia	Spermatogonia	2322.59	31.58	46	0.796399	Fat-tailed dunnart
Spermatogonia	Spermatogonia	1087.69	27.54	25	0.432825	Fat-tailed dunnart
Spermatogonia	Spermatogonia	1933.33	30.6	35	0.605956	Fat-tailed dunnart
Spermatogonia	Spermatogonia	1492.22	19.3	17.5	0.302978	Fat-tailed dunnart
Spermatogonia	Spermatogonia	1492.22	19.3	17.5	0.302978	Fat-tailed dunnart
Spermatogonia	Spermatogonia	1644.23	19.765	19	0.328947	Fat-tailed dunnart
Spermatogonia	Spermatogonia	1644.23	19.765	19	0.328947	Fat-tailed dunnart
Spermatogonia	Spermatogonia	236.11	39.25	15	0.259695	Fat-tailed dunnart
Spermatogonia	Spermatogonia	1057.18	41.27	27	0.467452	Fat-tailed dunnart
Spermatogonia	Spermatogonia	2038.01	18.185	25.5	0.441482	Fat-tailed dunnart
Spermatogonia	Spermatogonia	2038.01	18.185	25.5	0.441482	Fat-tailed dunnart
Spermatogonia	Spermatogonia	1949.21	39.43	30	0.519391	Fat-tailed dunnart
Spermatogonia	Spermatogonia	392.22	35.5	21	0.363573	Fat-tailed dunnart
Spermatogonia	Spermatogonia	167.78	41.9	15	0.259695	Fat-tailed dunnart
Spermatogonia	Spermatogonia	3500.89	38.6	36	0.623269	Fat-tailed dunnart
Spermatogonia	Spermatogonia	1280.37	43.57	35	0.605956	Fat-tailed dunnart
Spermatogonia	Spermatogonia	1095.24	37.07	30	0.519391	Fat-tailed dunnart
Spermatogonia	Spermatogonia	1980.43	42.27	29	0.502078	Fat-tailed dunnart
Spermatogonia	Spermatogonia	1531.97	60.31	28	0.484765	Fat-tailed dunnart
Spermatogonia	Spermatogonia	1989.48	52.93	34	0.588643	Fat-tailed dunnart
Spermatogonia	Spermatogonia	108.06	36.38	9	0.155817	Fat-tailed dunnart
Spermatogonia	Spermatogonia	1039.93	18.615	22	0.380886	Fat-tailed dunnart
Spermatogonia	Spermatogonia	1039.93	18.615	22	0.380886	Fat-tailed dunnart
Spermatogonia	Spermatogonia	261.62	38.18	18	0.311634	Fat-tailed dunnart
Spermatogonia	Spermatogonia	989.63	18.845	24	0.415512	Fat-tailed dunnart
Spermatogonia	Spermatogonia	989.63	18.845	24	0.415512	Fat-tailed dunnart
Spermatogonia	Spermatogonia	2475.75	46.32	43	0.74446	Fat-tailed dunnart
Spermatogonia	Spermatogonia	1749.63	35.33	35	0.605956	Fat-tailed dunnart
Spermatogonia	Spermatogonia	1900.34	26.92	28	0.484765	Fat-tailed dunnart
Spermatogonia	Spermatogonia	2837.22	26.53	40	0.692521	Fat-tailed dunnart
Spermatogonia	Spermatogonia	1523.61	14.315	27	0.467452	Fat-tailed dunnart
Spermatogonia	Spermatogonia	1523.61	14.315	27	0.467452	Fat-tailed dunnart
Spermatogonia	Spermatogonia	2110.79	33.04	32	0.554017	Fat-tailed dunnart
Spermatogonia	Spermatogonia	2145.33	35.1	36	0.623269	Fat-tailed dunnart
Spermatogonia	Spermatogonia	2349.68	30.93	33	0.57133	Fat-tailed dunnart
Spermatogonia	Spermatogonia	2268.75	33.31	45	0.779086	Fat-tailed dunnart
Spermatogonia	Spermatogonia	1036.89	28.8	33	0.57133	Fat-tailed dunnart
Spermatogonia	Spermatogonia	1997.78	27.17	36	0.623269	Fat-tailed dunnart
Spermatogonia	Spermatogonia	2709.88	79	65	1.12535	Fat-tailed dunnart
Spermatogonia	Spermatogonia	1794.36	28.77	28	0.484765	Fat-tailed dunnart
Spermatogonia	Spermatogonia	3388.24	33.59	43	0.74446	Fat-tailed dunnart
Spermatogonia	Spermatogonia	3038.26	31.53	41	0.709834	Fat-tailed dunnart
Spermatogonia	Spermatogonia	3051.25	31.56	39	0.675208	Fat-tailed dunnart
Spermatogonia	Spermatogonia	335.05	39.59	19	0.328947	Fat-tailed dunnart
Spermatogonia	Spermatogonia	1173.57	36.96	31	0.536704	Fat-tailed dunnart
Spermatogonia	Spermatogonia	1392.06	27.43	34	0.588643	Fat-tailed dunnart
Spermatogonia	Spermatogonia	1099.26	27.07	35	0.605956	Fat-tailed dunnart
Spermatogonia	Spermatogonia	4615.67	34.72	62	1.07341	Fat-tailed dunnart
Spermatogonia	Spermatogonia	1658.1	28.21	43	0.74446	Fat-tailed dunnart
Spermatogonia	Spermatogonia	2756	28.63	36	0.623269	Fat-tailed dunnart
Spermatogonia	Spermatogonia	2393.33	29	34	0.588643	Fat-tailed dunnart
Spermatogonia	Spermatogonia	485.47	28.46	25	0.432825	Fat-tailed dunnart
Spermatogonia	Spermatogonia	782.74	29.77	27	0.467452	Fat-tailed dunnart
Spermatogonia	Spermatogonia	1744.44	30.5	32	0.554017	Fat-tailed dunnart
Spermatogonia	Spermatogonia	237.22	32.75	23	0.398199	Fat-tailed dunnart
Spermatogonia	Spermatogonia	1458.57	30.11	34	0.588643	Fat-tailed dunnart
Spermatogonia	Spermatogonia	1248.03	39.19	28	0.484765	Fat-tailed dunnart
Spermatogonia	Spermatogonia	550.77	33.85	25	0.432825	Fat-tailed dunnart
Spermatogonia	Spermatogonia	205	37.63	22	0.380886	Fat-tailed dunnart
Spermatogonia	Spermatogonia	1109.78	25.1	36	0.623269	Fat-tailed dunnart
Spermatogonia	Spermatogonia	300	20.5	22	0.380886	Fat-tailed dunnart
Spermatogonia	Spermatogonia	149.63	23.39	12	0.207756	Fat-tailed dunnart
Spermatogonia	Spermatogonia	3203.63	23.53	52	0.900277	Fat-tailed dunnart
Spermatogonia	Spermatogonia	1446.32	24.15	27	0.467452	Fat-tailed dunnart
Spermatogonia	Spermatogonia	1030.37	20.83	34	0.588643	Fat-tailed dunnart
Spermatogonia	Spermatogonia	4307.37	26.76	52	0.900277	Fat-tailed dunnart
Spermatogonia	Spermatogonia	2859.36	31.57	32	0.554017	Fat-tailed dunnart
Spermatogonia	Spermatogonia	161.82	19.95	18	0.311634	Fat-tailed dunnart
Spermatogonia	Spermatogonia	1092.91	24.73	29	0.502078	Fat-tailed dunnart
Spermatogonia	Spermatogonia	1899.44	28.25	33	0.57133	Fat-tailed dunnart
Spermatogonia	Spermatogonia	1683.79	24.59	43	0.74446	Fat-tailed dunnart
Spermatogonia	Spermatogonia	271.11	24	21	0.363573	Fat-tailed dunnart
Spermatogonia	Spermatogonia	557.62	20.36	31	0.536704	Fat-tailed dunnart
Spermatogonia	Spermatogonia	408.89	20.5	20	0.34626	Fat-tailed dunnart
Spermatogonia	Spermatogonia	3083.25	26.11	33	0.57133	Fat-tailed dunnart
Spermatogonia	Spermatogonia	659.05	20.71	30	0.519391	Fat-tailed dunnart
Spermatogonia	Spermatogonia	167.78	27.1	15	0.259695	Fat-tailed dunnart
Spermatogonia	Spermatogonia	2507.7	28.11	33	0.57133	Fat-tailed dunnart
Spermatogonia	Spermatogonia	2783.13	25.66	39	0.675208	Fat-tailed dunnart
Spermatogonia	Spermatogonia	1134.07	23.13	35	0.605956	Fat-tailed dunnart
Spermatogonia	Spermatogonia	390.19	23.29	22	0.380886	Fat-tailed dunnart
Spermatogonia	Spermatogonia	1728.5	49.58	66	1.14266	Fat-tailed dunnart
Spermatogonia	Spermatogonia	88.33	19.95	15	0.259695	Fat-tailed dunnart
Spermatogonia	Spermatogonia	147.47	19.59	18	0.311634	Fat-tailed dunnart
Spermatogonia	Spermatogonia	300.85	20.38	25	0.432825	Fat-tailed dunnart
Spermatogonia	Spermatogonia	366.67	22.46	26	0.450139	Fat-tailed dunnart
Spermatogonia	Spermatogonia	1622.22	28	45	0.779086	Fat-tailed dunnart
Spermatogonia	Spermatogonia	764.92	21.93	31	0.536704	Fat-tailed dunnart
Spermatogonia	Spermatogonia	295.56	22.38	26	0.450139	Fat-tailed dunnart
Spermatogonia	Spermatogonia	307.52	20.38	25	0.432825	Fat-tailed dunnart
Spermatogonia	Spermatogonia	518.89	21.5	27	0.467452	Fat-tailed dunnart
Spermatogonia	Spermatogonia	479.93	20.61	38	0.657895	Fat-tailed dunnart
Spermatogonia	Spermatogonia	276.77	20.27	20	0.34626	Fat-tailed dunnart
Spermatogonia	Spermatogonia	218.33	18.08	21	0.363573	Fat-tailed dunnart
Spermatogonia	Spermatogonia	671.9	23.82	30	0.519391	Fat-tailed dunnart
Spermatogonia	Spermatogonia	218.98	20.54	23	0.398199	Fat-tailed dunnart
Spermatogonia	Spermatogonia	155.76	23.55	20	0.34626	Fat-tailed dunnart
Spermatogonia	Spermatogonia	138.99	21.64	18	0.311634	Fat-tailed dunnart
Spermatogonia	Spermatogonia	1810.37	21.41	52	0.900277	Fat-tailed dunnart
Spermatogonia	Spermatogonia	345.19	19.33	23	0.398199	Fat-tailed dunnart
Spermatogonia	Spermatogonia	595.3	20.04	29	0.502078	Fat-tailed dunnart
Spermatogonia	Spermatogonia	520.87	20.61	29	0.502078	Fat-tailed dunnart
Spermatogonia	Spermatogonia	271.11	19.04	26	0.450139	Fat-tailed dunnart
Spermatogonia	Spermatogonia	177.96	19.54	22	0.380886	Fat-tailed dunnart
Spermatogonia	Spermatogonia	412.56	20.35	27	0.467452	Fat-tailed dunnart
Spermatogonia	Spermatogonia	320.74	11.835	17.5	0.302978	Fat-tailed dunnart
Spermatogonia	Spermatogonia	320.74	11.835	17.5	0.302978	Fat-tailed dunnart
Spermatogonia	Spermatogonia	178.79	18.23	20	0.34626	Fat-tailed dunnart
Spermatogonia	Spermatogonia	374.44	20.5	23	0.398199	Fat-tailed dunnart
Spermatogonia	Spermatogonia	545.81	21.19	28	0.484765	Fat-tailed dunnart
Spermatogonia	Spermatogonia	721.32	18.34	39	0.675208	Fat-tailed dunnart
Spermatogonia	Spermatogonia	228.89	17.65	26	0.450139	Fat-tailed dunnart
Spermatogonia	Spermatogonia	406.39	22.88	23	0.398199	Fat-tailed dunnart
Spermatogonia	Spermatogonia	1812.7	28.32	32	0.554017	Fat-tailed dunnart
Spermatogonia	Spermatogonia	228.89	25.23	26	0.450139	Fat-tailed dunnart
Spermatogonia	Spermatogonia	818.56	22.44	40	0.692521	Fat-tailed dunnart
Spermatogonia	Spermatogonia	309.91	20.77	28	0.484765	Fat-tailed dunnart
Spermatogonia	Spermatogonia	235.56	24.92	24	0.415512	Fat-tailed dunnart
Spermatogonia	Spermatogonia	305.73	19.42	27	0.467452	Fat-tailed dunnart
Spermatogonia	Spermatogonia	205.19	18.33	23	0.398199	Fat-tailed dunnart
Spermatogonia	Spermatogonia	166.75	21.04	25	0.432825	Fat-tailed dunnart
Spermatogonia	Spermatogonia	456.5	22.58	27	0.467452	Fat-tailed dunnart
Spermatogonia	Spermatogonia	280.34	19.15	25	0.432825	Fat-tailed dunnart
Spermatogonia	Spermatogonia	505.33	22.53	33	0.57133	Fat-tailed dunnart
Spermatogonia	Spermatogonia	1473.05	22.79	53	0.91759	Fat-tailed dunnart
Spermatogonia	Spermatogonia	244.44	22.33	24	0.415512	Fat-tailed dunnart
Spermatogonia	Spermatogonia	462.22	22.23	26	0.450139	Fat-tailed dunnart
Spermatogonia	Spermatogonia	1943.78	14.185	40.5	0.701177	Fat-tailed dunnart
Spermatogonia	Spermatogonia	1943.78	14.185	40.5	0.701177	Fat-tailed dunnart
Spermatogonia	Spermatogonia	425.93	19.17	32	0.554017	Fat-tailed dunnart
Spermatogonia	Spermatogonia	692.06	21.14	32	0.554017	Fat-tailed dunnart
Spermatogonia	Spermatogonia	585.24	20.82	30	0.519391	Fat-tailed dunnart
Spermatogonia	Spermatogonia	122.04	21.46	22	0.380886	Fat-tailed dunnart
Spermatogonia	Spermatogonia	252.93	24.41	20	0.34626	Fat-tailed dunnart
Spermatogonia	Spermatogonia	613.33	27	25	0.432825	Fat-tailed dunnart
Spermatogonia	Spermatogonia	251.94	24.13	21	0.363573	Fat-tailed dunnart
Spermatogonia	Spermatogonia	191.56	25.05	16	0.277008	Fat-tailed dunnart
Spermatogonia	Spermatogonia	1211.3	28.92	25	0.432825	Fat-tailed dunnart
Spermatogonia	Spermatogonia	116.11	24.05	15	0.259695	Fat-tailed dunnart
Spermatogonia	Spermatogonia	207.5	24.46	21	0.363573	Fat-tailed dunnart
Spermatogonia	Spermatogonia	705.75	13.735	20	0.34626	Fat-tailed dunnart
Spermatogonia	Spermatogonia	705.75	13.735	20	0.34626	Fat-tailed dunnart
Spermatogonia	Spermatogonia	262.69	23.21	23	0.398199	Fat-tailed dunnart
Spermatogonia	Spermatogonia	2053.04	27.73	37	0.640582	Fat-tailed dunnart
Spermatogonia	Spermatogonia	887.69	24.77	28	0.484765	Fat-tailed dunnart
Spermatogonia	Spermatogonia	1030	22.9	35	0.605956	Fat-tailed dunnart
Spermatogonia	Spermatogonia	1504.32	13.095	26	0.450139	Fat-tailed dunnart
Spermatogonia	Spermatogonia	1504.32	13.095	26	0.450139	Fat-tailed dunnart
Spermatogonia	Spermatogonia	374.13	22.64	29	0.502078	Fat-tailed dunnart
Spermatogonia	Spermatogonia	592.78	24.75	31	0.536704	Fat-tailed dunnart
Spermatogonia	Spermatogonia	617.52	24.12	27	0.467452	Fat-tailed dunnart
Spermatogonia	Spermatogonia	206.3	27.92	22	0.380886	Fat-tailed dunnart
Spermatogonia	Spermatogonia	2752.44	38.07	36	0.623269	Fat-tailed dunnart
Spermatogonia	Spermatogonia	3197.78	25.25	80	1.38504	Fat-tailed dunnart
Spermatogonia	Spermatogonia	500.09	21.96	27	0.467452	Fat-tailed dunnart
Spermatogonia	Spermatogonia	1075.3	20.12	27	0.467452	Fat-tailed dunnart
Spermatogonia	Spermatogonia	2089.63	24.13	35	0.605956	Fat-tailed dunnart
Spermatogonia	Spermatogonia	2371.11	27	46	0.796399	Fat-tailed dunnart
Spermatogonia	Spermatogonia	594.36	27.27	28	0.484765	Fat-tailed dunnart
Spermatogonia	Spermatogonia	2202.22	27	47	0.813712	Fat-tailed dunnart
Spermatogonia	Spermatogonia	404.89	21.2	34	0.588643	Fat-tailed dunnart
Spermatogonia	Spermatogonia	163.43	21.64	18	0.311634	Fat-tailed dunnart
Spermatogonia	Spermatogonia	122.64	47.31	18	0.311634	Fat-tailed dunnart
Spermatogonia	Spermatogonia	607.7	23.54	29	0.502078	Fat-tailed dunnart
Spermatogonia	Spermatogonia	380.28	27.13	23	0.398199	Fat-tailed dunnart
Spermatogonia	Spermatogonia	452.5	25.13	35	0.605956	Fat-tailed dunnart
Spermatogonia	Spermatogonia	468.89	21.33	24	0.415512	Fat-tailed dunnart
Spermatogonia	Spermatogonia	466.67	22	29	0.502078	Fat-tailed dunnart
Spermatogonia	Spermatogonia	428.89	25.54	24	0.415512	Fat-tailed dunnart
Spermatogonia	Spermatogonia	2159.36	24.71	34	0.588643	Fat-tailed dunnart
Spermatogonia	Spermatogonia	582.31	21.96	27	0.467452	Fat-tailed dunnart
Spermatogonia	Spermatogonia	626.98	22.43	30	0.519391	Fat-tailed dunnart
Spermatogonia	Spermatogonia	181.92	22.95	19	0.328947	Fat-tailed dunnart
Spermatogonia	Spermatogonia	288.89	18.92	26	0.450139	Fat-tailed dunnart
Spermatogonia	Spermatogonia	384.44	18.62	26	0.450139	Fat-tailed dunnart
Spermatogonia	Spermatogonia	416.59	19.54	29	0.502078	Fat-tailed dunnart
Spermatogonia	Spermatogonia	242.42	21.36	19	0.328947	Fat-tailed dunnart
Spermatogonia	Spermatogonia	653.02	21.57	30	0.519391	Fat-tailed dunnart
Spermatogonia	Spermatogonia	413.94	18.14	20	0.34626	Fat-tailed dunnart
Spermatogonia	Spermatogonia	244.63	20.54	22	0.380886	Fat-tailed dunnart
Spermatogonia	Spermatogonia	1243.11	23.93	36	0.623269	Fat-tailed dunnart
Spermatogonia	Spermatogonia	533.97	22.71	29	0.502078	Fat-tailed dunnart
Spermatogonia	Spermatogonia	2163.41	23.93	38	0.657895	Fat-tailed dunnart
Spermatogonia	Spermatogonia	1479.13	21.68	33	0.57133	Fat-tailed dunnart
Spermatogonia	Spermatogonia	681.745	10.17	22.5	0.389543	Fat-tailed dunnart
Spermatogonia	Spermatogonia	681.745	10.17	22.5	0.389543	Fat-tailed dunnart
Spermatogonia	Spermatogonia	515.56	18.13	24	0.415512	Fat-tailed dunnart
Spermatogonia	Spermatogonia	305.46	19.46	23	0.398199	Fat-tailed dunnart
Spermatogonia	Spermatogonia	1828.76	26.59	46	0.796399	Fat-tailed dunnart
Spermatogonia	Spermatogonia	422.99	19.65	27	0.467452	Fat-tailed dunnart
Spermatogonia	Spermatogonia	6207.54	30.87	72	1.24654	Fat-tailed dunnart
Spermatogonia	Spermatogonia	1145.95	24.46	33	0.57133	Fat-tailed dunnart
Spermatogonia	Spermatogonia	3229.63	33.33	38	0.657895	Fat-tailed dunnart
Spermatogonia	Spermatogonia	355.56	24.12	26	0.450139	Fat-tailed dunnart
Spermatogonia	Spermatogonia	4422.08	36.41	42	0.727147	Fat-tailed dunnart
Spermatogonia	Spermatogonia	431.11	23.5	26	0.450139	Fat-tailed dunnart
Spermatogonia	Spermatogonia	418.89	22.5	23	0.398199	Fat-tailed dunnart
Spermatogonia	Spermatogonia	146.3	20.92	22	0.380886	Fat-tailed dunnart
Spermatogonia	Spermatogonia	332.59	21.33	34	0.588643	Fat-tailed dunnart
Spermatogonia	Spermatogonia	1730.72	27.33	59	1.02147	Fat-tailed dunnart
Spermatogonia	Spermatogonia	2340	33	37	0.640582	Fat-tailed dunnart
Spermatogonia	Spermatogonia	293.61	20.13	23	0.398199	Fat-tailed dunnart
Spermatogonia	Spermatogonia	2183.54	30.16	41	0.709834	Fat-tailed dunnart
Spermatogonia	Spermatogonia	452.14	26.54	29	0.502078	Fat-tailed dunnart
Spermatogonia	Spermatogonia	134.81	28.33	22	0.380886	Fat-tailed dunnart
Spermatogonia	Spermatogonia	111.11	23	18	0.311634	Fat-tailed dunnart
Spermatogonia	Spermatogonia	2847.57	24.66	39	0.675208	Fat-tailed dunnart
Spermatogonia	Spermatogonia	195.28	24.96	21	0.363573	Fat-tailed dunnart
Spermatogonia	Spermatogonia	2597.78	24	51	0.882964	Fat-tailed dunnart
Spermatogonia	Spermatogonia	401.37	22.68	39	0.675208	Fat-tailed dunnart
Spermatogonia	Spermatogonia	118.38	20.82	18	0.311634	Fat-tailed dunnart
Spermatogonia	Spermatogonia	1909.15	23.59	44	0.761773	Fat-tailed dunnart
Spermatogonia	Spermatogonia	180.19	19.54	22	0.380886	Fat-tailed dunnart
Spermatogonia	Spermatogonia	623.33	21.75	38	0.657895	Fat-tailed dunnart
Spermatogonia	Spermatogonia	980	22.67	24	0.415512	Fat-tailed dunnart
Spermatogonia	Spermatogonia	2047.56	24.93	36	0.623269	Fat-tailed dunnart
Spermatogonia	Spermatogonia	464.59	13.54	24.5	0.424169	Fat-tailed dunnart
Spermatogonia	Spermatogonia	1228.89	27	31	0.536704	Fat-tailed dunnart
Spermatogonia	Spermatogonia	302.48	24.12	25	0.432825	Fat-tailed dunnart
Spermatogonia	Spermatogonia	626.58	26.04	27	0.467452	Fat-tailed dunnart
Spermatogonia	Spermatogonia	309.9	22.73	20	0.34626	Fat-tailed dunnart
Spermatogonia	Spermatogonia	279.44	26.75	23	0.398199	Fat-tailed dunnart
Spermatogonia	Spermatogonia	1528.25	26.57	32	0.554017	Fat-tailed dunnart
Spermatogonia	Spermatogonia	684.76	25.43	30	0.519391	Fat-tailed dunnart
Spermatogonia	Spermatogonia	527.78	22.5	25	0.432825	Fat-tailed dunnart
Spermatogonia	Spermatogonia	352.83	42.65	39	0.675208	Fat-tailed dunnart
Spermatogonia	Spermatogonia	3046.54	27.68	40	0.692521	Fat-tailed dunnart
Spermatogonia	Spermatogonia	536.51	22.89	32	0.554017	Fat-tailed dunnart
Spermatogonia	Spermatogonia	1324.93	22.97	39	0.675208	Fat-tailed dunnart
Spermatogonia	Spermatogonia	1676.36	22.69	47	0.813712	Fat-tailed dunnart
Spermatogonia	Spermatogonia	1753.52	23.19	51	0.882964	Fat-tailed dunnart
Spermatogonia	Spermatogonia	328.89	22.96	26	0.450139	Fat-tailed dunnart
Spermatogonia	Spermatogonia	311.39	24.13	23	0.398199	Fat-tailed dunnart
Spermatogonia	Spermatogonia	560	22.62	26	0.450139	Fat-tailed dunnart
Spermatogonia	Spermatogonia	305.47	21.46	25	0.432825	Fat-tailed dunnart
Spermatogonia	Spermatogonia	403.02	21.21	31	0.536704	Fat-tailed dunnart
Spermatogonia	Spermatogonia	1067.53	11.445	26	0.450139	Fat-tailed dunnart
Spermatogonia	Spermatogonia	1067.53	11.445	26	0.450139	Fat-tailed dunnart
Spermatogonia	Spermatogonia	321.48	21.33	22	0.380886	Fat-tailed dunnart
Spermatogonia	Spermatogonia	249.26	19.08	22	0.380886	Fat-tailed dunnart
Spermatogonia	Spermatogonia	1212.38	24.86	32	0.554017	Fat-tailed dunnart
Spermatogonia	Spermatogonia	1472.89	32.37	36	0.623269	Fat-tailed dunnart
Spermatogonia	Spermatogonia	773.33	38.38	26	0.450139	Fat-tailed dunnart
Spermatogonia	Spermatogonia	5034.03	43.16	55	0.952216	Fat-tailed dunnart
Spermatogonia	Spermatogonia	2034.29	37.86	31	0.536704	Fat-tailed dunnart
Spermatogonia	Spermatogonia	1750.63	39.03	39	0.675208	Fat-tailed dunnart
Spermatogonia	Spermatogonia	896.92	34.19	28	0.484765	Fat-tailed dunnart
Spermatogonia	Spermatogonia	1299.31	30.19	39	0.675208	Fat-tailed dunnart
Spermatogonia	Spermatogonia	593.33	27.33	24	0.415512	Fat-tailed dunnart
Spermatogonia	Spermatogonia	815.56	29.25	24	0.415512	Fat-tailed dunnart
Spermatogonia	Spermatogonia	793.76	26.81	27	0.467452	Fat-tailed dunnart
Spermatogonia	Spermatogonia	2196.53	27.59	38	0.657895	Fat-tailed dunnart
Spermatogonia	Spermatogonia	3996.67	37.06	40	0.692521	Fat-tailed dunnart
Spermatogonia	Spermatogonia	2693.33	28.88	40	0.692521	Fat-tailed dunnart
Spermatogonia	Spermatogonia	2867.62	32.39	32	0.554017	Fat-tailed dunnart
Spermatogonia	Spermatogonia	2194.6	36.14	31	0.536704	Fat-tailed dunnart
Spermatogonia	Spermatogonia	2175.56	26.5	32	0.554017	Fat-tailed dunnart
Spermatogonia	Spermatogonia	892.99	24.58	28	0.484765	Fat-tailed dunnart
Spermatogonia	Spermatogonia	835.56	27.5	24	0.415512	Fat-tailed dunnart
Spermatogonia	Spermatogonia	1775.56	32.89	45	0.779086	Fat-tailed dunnart
Spermatogonia	Spermatogonia	3987.99	33.22	43	0.74446	Fat-tailed dunnart
Spermatogonia	Spermatogonia	413.33	27.23	26	0.450139	Fat-tailed dunnart
Spermatogonia	Spermatogonia	347.78	23.75	22	0.380886	Fat-tailed dunnart
Spermatogonia	Spermatogonia	665.56	29.25	30	0.519391	Fat-tailed dunnart
Spermatogonia	Spermatogonia	1076.54	23.79	41	0.709834	Fat-tailed dunnart
Spermatogonia	Spermatogonia	466.3	28.17	25	0.432825	Fat-tailed dunnart
Spermatogonia	Spermatogonia	915.13	25.73	29	0.502078	Fat-tailed dunnart
Spermatogonia	Spermatogonia	445.71	32.71	30	0.519391	Fat-tailed dunnart
Spermatogonia	Spermatogonia	208.89	22.33	24	0.415512	Fat-tailed dunnart
Spermatogonia	Spermatogonia	1152.06	25.14	32	0.554017	Fat-tailed dunnart
Spermatogonia	Spermatogonia	1167.14	30.89	30	0.519391	Fat-tailed dunnart
Spermatogonia	Spermatogonia	790	31.25	30	0.519391	Fat-tailed dunnart
Spermatogonia	Spermatogonia	105.93	55.94	12	0.207756	Fat-tailed dunnart
Spermatogonia	Spermatogonia	836.67	29.5	29	0.502078	Fat-tailed dunnart
Spermatogonia	Spermatogonia	250.83	29.96	21	0.363573	Fat-tailed dunnart
Spermatogonia	Spermatogonia	529.57	26.35	28	0.484765	Fat-tailed dunnart
Spermatogonia	Spermatogonia	218.7	23.71	22	0.380886	Fat-tailed dunnart
Spermatogonia	Spermatogonia	806.24	35.19	27	0.467452	Fat-tailed dunnart
Spermatogonia	Spermatogonia	172.93	32.91	20	0.34626	Fat-tailed dunnart
Spermatogonia	Spermatogonia	619.23	24.35	27	0.467452	Fat-tailed dunnart
Spermatogonia	Spermatogonia	113.33	33.6	15	0.259695	Fat-tailed dunnart
Spermatogonia	Spermatogonia	43.19	27.06	9	0.155817	Fat-tailed dunnart
Spermatogonia	Spermatogonia	275.25	49.55	34	0.588643	Fat-tailed dunnart
Spermatogonia	Spermatogonia	470	26.25	30	0.519391	Fat-tailed dunnart
Spermatogonia	Spermatogonia	1127.01	27.62	29	0.502078	Fat-tailed dunnart
Spermatogonia	Spermatogonia	1837.14	28.57	32	0.554017	Fat-tailed dunnart
Spermatogonia	Spermatogonia	532.41	25.58	23	0.398199	Fat-tailed dunnart
Spermatogonia	Spermatogonia	606.41	25.12	27	0.467452	Fat-tailed dunnart
Spermatogonia	Spermatogonia	688.73	28.04	30	0.519391	Fat-tailed dunnart
Spermatogonia	Spermatogonia	671.75	25.86	30	0.519391	Fat-tailed dunnart
Spermatogonia	Spermatogonia	1398.1	26.71	32	0.554017	Fat-tailed dunnart
Spermatogonia	Spermatogonia	3617.22	38.44	44	0.761773	Fat-tailed dunnart
Spermatogonia	Spermatogonia	588.89	28.58	26	0.450139	Fat-tailed dunnart
Spermatogonia	Spermatogonia	1220.48	30.46	34	0.588643	Fat-tailed dunnart
Spermatogonia	Spermatogonia	520.48	32.93	31	0.536704	Fat-tailed dunnart
Spermatogonia	Spermatogonia	137.22	26.15	15	0.259695	Fat-tailed dunnart
Spermatogonia	Spermatogonia	399.06	28.42	27	0.467452	Fat-tailed dunnart
Spermatogonia	Spermatogonia	100	21.6	15	0.259695	Fat-tailed dunnart
Spermatogonia	Spermatogonia	1096.41	25.81	28	0.484765	Fat-tailed dunnart
Spermatogonia	Spermatogonia	239.39	20.86	20	0.34626	Fat-tailed dunnart
Spermatogonia	Spermatogonia	181.76	21.79	23	0.398199	Fat-tailed dunnart
Spermatogonia	Spermatogonia	282.22	23.96	26	0.450139	Fat-tailed dunnart
Spermatogonia	Spermatogonia	1807.14	26.46	34	0.588643	Fat-tailed dunnart
Spermatogonia	Spermatogonia	519.83	23.54	28	0.484765	Fat-tailed dunnart
Spermatogonia	Spermatogonia	570.77	21.58	28	0.484765	Fat-tailed dunnart
Spermatogonia	Spermatogonia	256.36	22.68	20	0.34626	Fat-tailed dunnart
Spermatogonia	Spermatogonia	399.13	27.39	29	0.502078	Fat-tailed dunnart
Spermatogonia	Spermatogonia	137.5	46.43	24	0.415512	Fat-tailed dunnart
Spermatogonia	Spermatogonia	474.29	23.79	30	0.519391	Fat-tailed dunnart
Spermatogonia	Spermatogonia	182.31	24.04	23	0.398199	Fat-tailed dunnart
Spermatogonia	Spermatogonia	88.89	22	15	0.259695	Fat-tailed dunnart
Spermatogonia	Spermatogonia	213.03	24.95	19	0.328947	Fat-tailed dunnart
Spermatogonia	Spermatogonia	449.555	11.8	17	0.294321	Fat-tailed dunnart
Spermatogonia	Spermatogonia	449.555	11.8	17	0.294321	Fat-tailed dunnart
Spermatogonia	Spermatogonia	1103.42	26.23	28	0.484765	Fat-tailed dunnart
Spermatogonia	Spermatogonia	348.89	21.96	24	0.415512	Fat-tailed dunnart
Spermatogonia	Spermatogonia	220	19.27	26	0.450139	Fat-tailed dunnart
Spermatogonia	Spermatogonia	381.03	19.27	28	0.484765	Fat-tailed dunnart
Spermatogonia	Spermatogonia	1030.16	21.36	32	0.554017	Fat-tailed dunnart
Spermatogonia	Spermatogonia	323.52	19.58	23	0.398199	Fat-tailed dunnart
Spermatogonia	Spermatogonia	808.25	21.43	31	0.536704	Fat-tailed dunnart
Spermatogonia	Spermatogonia	291.11	19.75	24	0.415512	Fat-tailed dunnart
Spermatogonia	Spermatogonia	955.38	20.54	28	0.484765	Fat-tailed dunnart
Spermatogonia	Spermatogonia	622.8	10.36	31	0.536704	Fat-tailed dunnart
Spermatogonia	Spermatogonia	622.8	10.36	31	0.536704	Fat-tailed dunnart
Spermatogonia	Spermatogonia	304.44	20.25	24	0.415512	Fat-tailed dunnart
Spermatogonia	Spermatogonia	1204.76	21.46	32	0.554017	Fat-tailed dunnart
Spermatogonia	Spermatogonia	708.89	21.19	26	0.450139	Fat-tailed dunnart
Spermatogonia	Spermatogonia	217.78	18.96	24	0.415512	Fat-tailed dunnart
Spermatogonia	Spermatogonia	410	20.5	23	0.398199	Fat-tailed dunnart
Spermatogonia	Spermatogonia	1426.43	25.04	31	0.536704	Fat-tailed dunnart
Spermatogonia	Spermatogonia	1023.25	21.11	33	0.57133	Fat-tailed dunnart
Spermatogonia	Spermatogonia	272.91	20.81	25	0.432825	Fat-tailed dunnart
Spermatogonia	Spermatogonia	783.81	19.57	32	0.554017	Fat-tailed dunnart
Spermatogonia	Spermatogonia	191.11	19.78	27	0.467452	Fat-tailed dunnart
Spermatogonia	Spermatogonia	862.52	20.47	34	0.588643	Fat-tailed dunnart
Spermatogonia	Spermatogonia	791.11	23	31	0.536704	Fat-tailed dunnart
Spermatogonia	Spermatogonia	773.16	21.04	28	0.484765	Fat-tailed dunnart
Spermatogonia	Spermatogonia	1542.96	22.33	35	0.605956	Fat-tailed dunnart
Spermatogonia	Spermatogonia	456.48	19.58	25	0.432825	Fat-tailed dunnart
Spermatogonia	Spermatogonia	321.2	18.54	25	0.432825	Fat-tailed dunnart
Spermatogonia	Spermatogonia	530.17	19.42	27	0.467452	Fat-tailed dunnart
Spermatogonia	Spermatogonia	681.33	20.6	34	0.588643	Fat-tailed dunnart
Spermatogonia	Spermatogonia	1123.76	26.65	28	0.484765	Fat-tailed dunnart
Spermatogonia	Spermatogonia	491.78	20.9	33	0.57133	Fat-tailed dunnart
Spermatogonia	Spermatogonia	878.72	22.58	27	0.467452	Fat-tailed dunnart
Spermatogonia	Spermatogonia	823.65	17.89	34	0.588643	Fat-tailed dunnart
Spermatogonia	Spermatogonia	579.06	21.42	27	0.467452	Fat-tailed dunnart
Spermatogonia	Spermatogonia	532.44	19.57	36	0.623269	Fat-tailed dunnart
Spermatogonia	Spermatogonia	847.69	21.54	27	0.467452	Fat-tailed dunnart
Spermatogonia	Spermatogonia	192.65	17.85	24	0.415512	Fat-tailed dunnart
Spermatogonia	Spermatogonia	47.36	23.19	9	0.155817	Fat-tailed dunnart
Spermatogonia	Spermatogonia	131.67	21.08	21	0.363573	Fat-tailed dunnart
Spermatogonia	Spermatogonia	1337.46	24.29	46	0.796399	Fat-tailed dunnart
Spermatogonia	Spermatogonia	401.79	18.19	27	0.467452	Fat-tailed dunnart
Spermatogonia	Spermatogonia	183.84	19.68	18	0.311634	Fat-tailed dunnart
Spermatogonia	Spermatogonia	145	21.75	21	0.363573	Fat-tailed dunnart
Spermatogonia	Spermatogonia	277.96	21.54	22	0.380886	Fat-tailed dunnart
Spermatogonia	Spermatogonia	203.33	19.5	19	0.328947	Fat-tailed dunnart
Spermatogonia	Spermatogonia	143.89	19.95	15	0.259695	Fat-tailed dunnart
Spermatogonia	Spermatogonia	527.3	21.86	30	0.519391	Fat-tailed dunnart
Spermatogonia	Spermatogonia	804.1	25.58	28	0.484765	Fat-tailed dunnart
Spermatogonia	Spermatogonia	3154.44	27.25	34	0.588643	Fat-tailed dunnart
Spermatogonia	Spermatogonia	175.83	21.38	21	0.363573	Fat-tailed dunnart
Spermatogonia	Spermatogonia	1340.37	22.57	35	0.605956	Fat-tailed dunnart
Spermatogonia	Spermatogonia	2152.78	25.25	33	0.57133	Fat-tailed dunnart
Spermatogonia	Spermatogonia	1333.33	24.54	26	0.450139	Fat-tailed dunnart
Spermatogonia	Spermatogonia	1882.22	25	39	0.675208	Fat-tailed dunnart
Spermatogonia	Spermatogonia	205.56	23.17	21	0.363573	Fat-tailed dunnart
Spermatogonia	Spermatogonia	2257.22	14.75	23.5	0.406856	Fat-tailed dunnart
Spermatogonia	Spermatogonia	2257.22	14.75	23.5	0.406856	Fat-tailed dunnart
Spermatogonia	Spermatogonia	89.31	40.32	18	0.311634	Fat-tailed dunnart
Spermatogonia	Spermatogonia	1016.27	22.68	29	0.502078	Fat-tailed dunnart
Spermatogonia	Spermatogonia	571.11	19.88	26	0.450139	Fat-tailed dunnart
Spermatogonia	Spermatogonia	621.28	22.81	29	0.502078	Fat-tailed dunnart
Spermatogonia	Spermatogonia	42.36	25.44	9	0.155817	Fat-tailed dunnart
Spermatogonia	Spermatogonia	460	20	30	0.519391	Fat-tailed dunnart
Spermatogonia	Spermatogonia	1165.28	28.63	25	0.432825	Fat-tailed dunnart
Spermatogonia	Spermatogonia	815.56	28.38	26	0.450139	Fat-tailed dunnart
Spermatogonia	Spermatogonia	839.91	27.04	25	0.432825	Fat-tailed dunnart
Spermatogonia	Spermatogonia	562.22	22.17	24	0.415512	Fat-tailed dunnart
Spermatogonia	Spermatogonia	640.68	23.35	28	0.484765	Fat-tailed dunnart
Spermatogonia	Spermatogonia	1571.39	27.88	25	0.432825	Fat-tailed dunnart
Spermatogonia	Spermatogonia	408.63	22.12	27	0.467452	Fat-tailed dunnart
Spermatogonia	Spermatogonia	279.39	24.91	19	0.328947	Fat-tailed dunnart
Spermatogonia	Spermatogonia	861.54	26.15	28	0.484765	Fat-tailed dunnart
Spermatogonia	Spermatogonia	72.22	22.1	15	0.259695	Fat-tailed dunnart
Spermatogonia	Spermatogonia	631.45	24.85	27	0.467452	Fat-tailed dunnart
Spermatogonia	Spermatogonia	878.73	22.39	32	0.554017	Fat-tailed dunnart
Spermatogonia	Spermatogonia	640.4	21.61	31	0.536704	Fat-tailed dunnart
Spermatogonia	Spermatogonia	164.81	26.58	22	0.380886	Fat-tailed dunnart
Spermatogonia	Spermatogonia	794.02	22.85	28	0.484765	Fat-tailed dunnart
Spermatogonia	Spermatogonia	1024.79	22.62	29	0.502078	Fat-tailed dunnart
Spermatogonia	Spermatogonia	2794.96	27.03	38	0.657895	Fat-tailed dunnart
Spermatogonia	Spermatogonia	230.56	20.58	21	0.363573	Fat-tailed dunnart
Spermatogonia	Spermatogonia	483.97	21.07	31	0.536704	Fat-tailed dunnart
Spermatogonia	Spermatogonia	1548.61	26.13	25	0.432825	Fat-tailed dunnart
Spermatogonia	Spermatogonia	1012.65	25.31	27	0.467452	Fat-tailed dunnart
Spermatogonia	Spermatogonia	1709.13	24.96	31	0.536704	Fat-tailed dunnart
Spermatogonia	Spermatogonia	26.94	20.88	9	0.155817	Fat-tailed dunnart
Spermatogonia	Spermatogonia	451.02	23.96	23	0.398199	Fat-tailed dunnart
Spermatogonia	Spermatogonia	340.09	26.04	23	0.398199	Fat-tailed dunnart
Spermatogonia	Spermatogonia	273.08	23.12	27	0.467452	Fat-tailed dunnart
Spermatogonia	Spermatogonia	406.76	23.04	23	0.398199	Fat-tailed dunnart
Spermatogonia	Spermatogonia	1429.21	27.29	31	0.536704	Fat-tailed dunnart
Spermatogonia	Spermatogonia	851.11	24.33	24	0.415512	Fat-tailed dunnart
Spermatogonia	Spermatogonia	4247.78	31.97	51	0.882964	Fat-tailed dunnart
Spermatogonia	Spermatogonia	1716.19	27.18	32	0.554017	Fat-tailed dunnart
Spermatogonia	Spermatogonia	7963.33	36.39	57	0.986842	Fat-tailed dunnart
Spermatogonia	Spermatogonia	543.5	24.42	27	0.467452	Fat-tailed dunnart
Spermatogonia	Spermatogonia	420	25.92	26	0.450139	Fat-tailed dunnart
Spermatogonia	Spermatogonia	2437.78	29.75	32	0.554017	Fat-tailed dunnart
Spermatogonia	Spermatogonia	3404	32.87	36	0.623269	Fat-tailed dunnart
Spermatogonia	Spermatogonia	63.7	22.44	12	0.207756	Fat-tailed dunnart
Spermatogonia	Spermatogonia	133.64	22.05	19	0.328947	Fat-tailed dunnart
Spermatogonia	Spermatogonia	248.89	24.15	26	0.450139	Fat-tailed dunnart
Spermatogonia	Spermatogonia	260.93	28.42	23	0.398199	Fat-tailed dunnart
Spermatogonia	Spermatogonia	2434.38	17.095	21.5	0.37223	Fat-tailed dunnart
Spermatogonia	Spermatogonia	2434.38	17.095	21.5	0.37223	Fat-tailed dunnart
Spermatogonia	Spermatogonia	3902.64	31.28	42	0.727147	Fat-tailed dunnart
Spermatogonia	Spermatogonia	111.94	31.13	21	0.363573	Fat-tailed dunnart
Spermatogonia	Spermatogonia	4530.32	33.89	34	0.588643	Fat-tailed dunnart
Spermatogonia	Spermatogonia	556.73	13.645	22	0.380886	Fat-tailed dunnart
Spermatogonia	Spermatogonia	556.73	13.645	22	0.380886	Fat-tailed dunnart
Spermatogonia	Spermatogonia	949.23	27.92	28	0.484765	Fat-tailed dunnart
Spermatogonia	Spermatogonia	938.29	23.38	28	0.484765	Fat-tailed dunnart
Spermatogonia	Spermatogonia	860	30.33	24	0.415512	Fat-tailed dunnart
Spermatogonia	Spermatogonia	50.97	24.56	9	0.155817	Fat-tailed dunnart
Spermatogonia	Spermatogonia	804.62	24.96	28	0.484765	Fat-tailed dunnart
Spermatogonia	Spermatogonia	1565.93	31.33	25	0.432825	Fat-tailed dunnart
Spermatogonia	Spermatogonia	1059.26	25.33	25	0.432825	Fat-tailed dunnart
Spermatogonia	Spermatogonia	2262.22	36.5	32	0.554017	Fat-tailed dunnart
Spermatogonia	Spermatogonia	1811.03	31.61	33	0.57133	Fat-tailed dunnart
Spermatogonia	Spermatogonia	605.9	34.35	27	0.467452	Fat-tailed dunnart
Spermatogonia	Spermatogonia	2924.84	29.61	31	0.536704	Fat-tailed dunnart
Spermatogonia	Spermatogonia	2634.44	27.19	40	0.692521	Fat-tailed dunnart
Spermatogonia	Spermatogonia	1609.91	42.54	27	0.467452	Fat-tailed dunnart
Spermatogonia	Spermatogonia	2191.91	22.205	22.5	0.389543	Fat-tailed dunnart
Spermatogonia	Spermatogonia	2191.91	22.205	22.5	0.389543	Fat-tailed dunnart
Spermatogonia	Spermatogonia	1686.51	32.21	33	0.57133	Fat-tailed dunnart
Spermatogonia	Spermatogonia	2667.3	36.43	32	0.554017	Fat-tailed dunnart
Spermatogonia	Spermatogonia	2319.36	39.21	34	0.588643	Fat-tailed dunnart
Spermatogonia	Spermatogonia	881.45	25.35	27	0.467452	Fat-tailed dunnart
Spermatogonia	Spermatogonia	1176.07	24.19	30	0.519391	Fat-tailed dunnart
Spermatogonia	Spermatogonia	946.67	24	28	0.484765	Fat-tailed dunnart
Spermatogonia	Spermatogonia	2363.68	17.29	26.5	0.458795	Fat-tailed dunnart
Spermatogonia	Spermatogonia	2363.68	17.29	26.5	0.458795	Fat-tailed dunnart
Spermatogonia	Spermatogonia	67.22	21.65	15	0.259695	Fat-tailed dunnart
Spermatogonia	Spermatogonia	48.33	21.75	15	0.259695	Fat-tailed dunnart
Spermatogonia	Spermatogonia	73.33	42	15	0.259695	Fat-tailed dunnart
Spermatogonia	Spermatogonia	586.32	25.15	27	0.467452	Fat-tailed dunnart
Spermatogonia	Spermatogonia	1303.17	29.64	32	0.554017	Fat-tailed dunnart
Spermatogonia	Spermatogonia	273.52	26.08	23	0.398199	Fat-tailed dunnart
Spermatogonia	Spermatogonia	2945.78	34.07	36	0.623269	Fat-tailed dunnart
Spermatogonia	Spermatogonia	3323.33	37.64	35	0.605956	Fat-tailed dunnart
Spermatogonia	Spermatogonia	2401.9	40.43	33	0.57133	Fat-tailed dunnart
Spermatogonia	Spermatogonia	1149.93	29.27	32	0.554017	Fat-tailed dunnart
Spermatogonia	Spermatogonia	566.11	25.25	25	0.432825	Fat-tailed dunnart
Spermatogonia	Spermatogonia	365	27.08	21	0.363573	Fat-tailed dunnart
Spermatogonia	Spermatogonia	1107.3	27.68	32	0.554017	Fat-tailed dunnart
Spermatogonia	Spermatogonia	403.59	24.38	27	0.467452	Fat-tailed dunnart
Spermatogonia	Spermatogonia	638.81	23.54	29	0.502078	Fat-tailed dunnart
Spermatogonia	Spermatogonia	95.86	24.05	19	0.328947	Fat-tailed dunnart
Spermatogonia	Spermatogonia	877.78	29.13	24	0.415512	Fat-tailed dunnart
Spermatogonia	Spermatogonia	1939.52	33.07	31	0.536704	Fat-tailed dunnart
Spermatogonia	Spermatogonia	375.56	26.96	26	0.450139	Fat-tailed dunnart
Spermatogonia	Spermatogonia	578.46	38.35	28	0.484765	Fat-tailed dunnart
Spermatogonia	Spermatogonia	444.44	23.65	26	0.450139	Fat-tailed dunnart
Spermatogonia	Spermatogonia	497.52	35.12	27	0.467452	Fat-tailed dunnart
Spermatogonia	Spermatogonia	388.89	32.5	28	0.484765	Fat-tailed dunnart
Spermatogonia	Spermatogonia	518.89	35.5	23	0.398199	Fat-tailed dunnart
Spermatogonia	Spermatogonia	1782.86	29.68	32	0.554017	Fat-tailed dunnart
Spermatogonia	Spermatogonia	85	27.65	15	0.259695	Fat-tailed dunnart
Spermatogonia	Spermatogonia	512.48	23.38	27	0.467452	Fat-tailed dunnart
Spermatogonia	Spermatogonia	684.44	23.38	24	0.415512	Fat-tailed dunnart
Spermatogonia	Spermatogonia	2391.54	29.27	29	0.502078	Fat-tailed dunnart
Spermatogonia	Spermatogonia	1139.92	27.68	31	0.536704	Fat-tailed dunnart
Spermatogonia	Spermatogonia	2485.81	29.46	29	0.502078	Fat-tailed dunnart
Spermatogonia	Spermatogonia	1637.04	28.33	25	0.432825	Fat-tailed dunnart
Spermatogonia	Spermatogonia	1984.79	27.92	28	0.484765	Fat-tailed dunnart
Spermatogonia	Spermatogonia	1451.45	25.42	28	0.484765	Fat-tailed dunnart
Spermatogonia	Spermatogonia	1542.96	27.67	25	0.432825	Fat-tailed dunnart
Spermatogonia	Spermatogonia	124.44	17.17	12	0.207756	Fat-tailed dunnart
Spermatogonia	Spermatogonia	624.79	18.85	27	0.467452	Fat-tailed dunnart
Spermatogonia	Spermatogonia	411.11	24.13	24	0.415512	Fat-tailed dunnart
Spermatogonia	Spermatogonia	371.11	17.5	28	0.484765	Fat-tailed dunnart
Spermatogonia	Spermatogonia	840.77	19.65	27	0.467452	Fat-tailed dunnart
Spermatogonia	Spermatogonia	664.44	24.38	24	0.415512	Fat-tailed dunnart
Spermatogonia	Spermatogonia	662.59	19.83	25	0.432825	Fat-tailed dunnart
Spermatogonia	Spermatogonia	709.35	20.79	25	0.432825	Fat-tailed dunnart
Spermatogonia	Spermatogonia	291.11	19.25	24	0.415512	Fat-tailed dunnart
Spermatogonia	Spermatogonia	506.67	22.67	24	0.415512	Fat-tailed dunnart
Spermatogonia	Spermatogonia	1551.75	21.43	32	0.554017	Fat-tailed dunnart
Spermatogonia	Spermatogonia	326.32	38.15	27	0.467452	Fat-tailed dunnart
Spermatogonia	Spermatogonia	663.61	22.38	25	0.432825	Fat-tailed dunnart
Spermatogonia	Spermatogonia	1166.93	26.76	43	0.74446	Fat-tailed dunnart
Spermatogonia	Spermatogonia	1834.29	22.14	32	0.554017	Fat-tailed dunnart
Spermatogonia	Spermatogonia	596.22	10.1	18.5	0.320291	Fat-tailed dunnart
Spermatogonia	Spermatogonia	596.22	10.1	18.5	0.320291	Fat-tailed dunnart
Spermatogonia	Spermatogonia	535.56	18.33	24	0.415512	Fat-tailed dunnart
Spermatogonia	Spermatogonia	1696.19	23.68	32	0.554017	Fat-tailed dunnart
Spermatogonia	Spermatogonia	2382.64	22.69	39	0.675208	Fat-tailed dunnart
Spermatogonia	Spermatogonia	1612.04	67.86	85	1.47161	Fat-tailed dunnart
Spermatogonia	Spermatogonia	3540.37	23.83	37	0.640582	Fat-tailed dunnart
Spermatogonia	Spermatogonia	1421.81	22.44	37	0.640582	Fat-tailed dunnart
Spermatogonia	Spermatogonia	1853.33	22.62	26	0.450139	Fat-tailed dunnart
Spermatogonia	Spermatogonia	2566.98	26.21	32	0.554017	Fat-tailed dunnart
Spermatogonia	Spermatogonia	2927.92	25.06	39	0.675208	Fat-tailed dunnart
Spermatogonia	Spermatogonia	1907.99	22.34	39	0.675208	Fat-tailed dunnart
Spermatogonia	Spermatogonia	3200.56	25.75	33	0.57133	Fat-tailed dunnart
Spermatogonia	Spermatogonia	1813.02	26.29	32	0.554017	Fat-tailed dunnart
Spermatogonia	Spermatogonia	4946.67	27	45	0.779086	Fat-tailed dunnart
Spermatogonia	Spermatogonia	1816.35	22.93	33	0.57133	Fat-tailed dunnart
Spermatogonia	Spermatogonia	1628.16	15.46	27.5	0.476108	Fat-tailed dunnart
Spermatogonia	Spermatogonia	1628.16	15.46	27.5	0.476108	Fat-tailed dunnart
Spermatogonia	Spermatogonia	755.56	38.25	24	0.415512	Fat-tailed dunnart
Spermatogonia	Spermatogonia	1586.42	21.72	50	0.865651	Fat-tailed dunnart
Spermatogonia	Spermatogonia	2002.15	23.09	43	0.74446	Fat-tailed dunnart
Spermatogonia	Spermatogonia	1606.75	22.32	31	0.536704	Fat-tailed dunnart
Spermatogonia	Spermatogonia	1936.19	23.93	32	0.554017	Fat-tailed dunnart
Spermatogonia	Spermatogonia	2513.73	26.96	33	0.57133	Fat-tailed dunnart
Spermatogonia	Spermatogonia	1886.03	27.07	32	0.554017	Fat-tailed dunnart
Spermatogonia	Spermatogonia	1556.43	22.54	31	0.536704	Fat-tailed dunnart
Spermatogonia	Spermatogonia	2503.66	26.71	43	0.74446	Fat-tailed dunnart
Spermatogonia	Spermatogonia	824.44	21.33	36	0.623269	Fat-tailed dunnart
Spermatogonia	Spermatogonia	2850.16	24.86	32	0.554017	Fat-tailed dunnart
Spermatogonia	Spermatogonia	1574.6	25.14	31	0.536704	Fat-tailed dunnart
Spermatogonia	Spermatogonia	1612.96	27.23	35	0.605956	Fat-tailed dunnart
Spermatogonia	Spermatogonia	1255.08	24.64	33	0.57133	Fat-tailed dunnart
Spermatogonia	Spermatogonia	976.51	23.71	33	0.57133	Fat-tailed dunnart
Spermatogonia	Spermatogonia	877.26	26.23	27	0.467452	Fat-tailed dunnart
Spermatogonia	Spermatogonia	1792.06	29.64	32	0.554017	Fat-tailed dunnart
Spermatogonia	Spermatogonia	3550.81	28.77	38	0.657895	Fat-tailed dunnart
Spermatogonia	Spermatogonia	1283.68	27.35	27	0.467452	Fat-tailed dunnart
Spermatogonia	Spermatogonia	309.44	21.63	22	0.380886	Fat-tailed dunnart
Spermatogonia	Spermatogonia	90.1	20.14	18	0.311634	Fat-tailed dunnart
Spermatogonia	Spermatogonia	452.22	22.5	23	0.398199	Fat-tailed dunnart
Spermatogonia	Spermatogonia	1350.26	23.38	27	0.467452	Fat-tailed dunnart
Spermatogonia	Spermatogonia	686.41	22.12	27	0.467452	Fat-tailed dunnart
Spermatogonia	Spermatogonia	1893.85	23.69	30	0.519391	Fat-tailed dunnart
Spermatogonia	Spermatogonia	464.44	21.58	24	0.415512	Fat-tailed dunnart
Spermatogonia	Spermatogonia	130.56	25.35	15	0.259695	Fat-tailed dunnart
Spermatogonia	Spermatogonia	891.43	24.21	32	0.554017	Fat-tailed dunnart
Spermatogonia	Spermatogonia	483.25	24.54	27	0.467452	Fat-tailed dunnart
Spermatogonia	Spermatogonia	961.59	22.86	33	0.57133	Fat-tailed dunnart
Spermatogonia	Spermatogonia	720.85	22.81	28	0.484765	Fat-tailed dunnart
Spermatogonia	Spermatogonia	2248.44	24.7	36	0.623269	Fat-tailed dunnart
Spermatogonia	Spermatogonia	404.21	21.04	31	0.536704	Fat-tailed dunnart
Spermatogonia	Spermatogonia	1075.56	27.33	36	0.623269	Fat-tailed dunnart
Spermatogonia	Spermatogonia	233.33	19.77	30	0.519391	Fat-tailed dunnart
Spermatogonia	Spermatogonia	681.54	21.65	28	0.484765	Fat-tailed dunnart
Spermatogonia	Spermatogonia	548.89	22.88	24	0.415512	Fat-tailed dunnart
Spermatogonia	Spermatogonia	445.335	11.515	18	0.311634	Fat-tailed dunnart
Spermatogonia	Spermatogonia	445.335	11.515	18	0.311634	Fat-tailed dunnart
Spermatogonia	Spermatogonia	671.11	23.63	24	0.415512	Fat-tailed dunnart
Spermatogonia	Spermatogonia	605.37	22.58	25	0.432825	Fat-tailed dunnart
Spermatogonia	Spermatogonia	575.47	23.04	27	0.467452	Fat-tailed dunnart
Spermatogonia	Spermatogonia	395.56	23.38	24	0.415512	Fat-tailed dunnart
Spermatogonia	Spermatogonia	146.16	24.59	19	0.328947	Fat-tailed dunnart
Spermatogonia	Spermatogonia	2626.53	25.81	37	0.640582	Fat-tailed dunnart
Spermatogonia	Spermatogonia	81.11	25.1	15	0.259695	Fat-tailed dunnart
Spermatogonia	Spermatogonia	530.32	23.18	30	0.519391	Fat-tailed dunnart
Spermatogonia	Spermatogonia	459.15	25.38	27	0.467452	Fat-tailed dunnart
Spermatogonia	Spermatogonia	1146.67	25	28	0.484765	Fat-tailed dunnart
Spermatogonia	Spermatogonia	868.73	22.54	30	0.519391	Fat-tailed dunnart
Spermatogonia	Spermatogonia	735.87	21.71	32	0.554017	Fat-tailed dunnart
Spermatogonia	Spermatogonia	177.37	20.45	18	0.311634	Fat-tailed dunnart
Spermatogonia	Spermatogonia	577.78	21.96	26	0.450139	Fat-tailed dunnart
Spermatogonia	Spermatogonia	662.22	23.04	24	0.415512	Fat-tailed dunnart
Spermatogonia	Spermatogonia	402.22	22.73	26	0.450139	Fat-tailed dunnart
Spermatogonia	Spermatogonia	652.875	11.84	21	0.363573	Fat-tailed dunnart
Spermatogonia	Spermatogonia	652.875	11.84	21	0.363573	Fat-tailed dunnart
Spermatogonia	Spermatogonia	468.89	24.46	26	0.450139	Fat-tailed dunnart
Spermatogonia	Spermatogonia	952.59	24.33	25	0.432825	Fat-tailed dunnart
Spermatogonia	Spermatogonia	123.89	20.92	21	0.363573	Fat-tailed dunnart
Spermatogonia	Spermatogonia	503.78	46.1	51	0.882964	Fat-tailed dunnart
Spermatogonia	Spermatogonia	311.48	23.08	22	0.380886	Fat-tailed dunnart
Spermatogonia	Spermatogonia	188.48	23.91	20	0.34626	Fat-tailed dunnart
Spermatogonia	Spermatogonia	3431.08	19.87	24.5	0.424169	Fat-tailed dunnart
Spermatogonia	Spermatogonia	3431.08	19.87	24.5	0.424169	Fat-tailed dunnart
Spermatogonia	Spermatogonia	1992.81	19.075	22	0.380886	Fat-tailed dunnart
Spermatogonia	Spermatogonia	1992.81	19.075	22	0.380886	Fat-tailed dunnart
Spermatogonia	Spermatogonia	1737.11	20.16	16.5	0.285665	Fat-tailed dunnart
Spermatogonia	Spermatogonia	1737.11	20.16	16.5	0.285665	Fat-tailed dunnart
Spermatogonia	Spermatogonia	7183.46	35.78	52	0.900277	Fat-tailed dunnart
Spermatogonia	Spermatogonia	4343.49	35.57	34	0.588643	Fat-tailed dunnart
Spermatogonia	Spermatogonia	2477.06	27.11	31	0.536704	Fat-tailed dunnart
Spermatogonia	Spermatogonia	653.24	25.96	23	0.398199	Fat-tailed dunnart
Spermatogonia	Spermatogonia	484.27	28.08	27	0.467452	Fat-tailed dunnart
Spermatogonia	Spermatogonia	897.26	22.62	28	0.484765	Fat-tailed dunnart
Spermatogonia	Spermatogonia	788.15	27.33	34	0.588643	Fat-tailed dunnart
Spermatogonia	Spermatogonia	1301.8	12.925	22.5	0.389543	Fat-tailed dunnart
Spermatogonia	Spermatogonia	1301.8	12.925	22.5	0.389543	Fat-tailed dunnart
Spermatogonia	Spermatogonia	833.15	26.92	23	0.398199	Fat-tailed dunnart
Spermatogonia	Spermatogonia	1061.4	13.265	18.5	0.320291	Fat-tailed dunnart
Spermatogonia	Spermatogonia	1061.4	13.265	18.5	0.320291	Fat-tailed dunnart
Spermatogonia	Spermatogonia	1448.29	25.42	29	0.502078	Fat-tailed dunnart
Spermatogonia	Spermatogonia	1185.37	14.015	17.5	0.302978	Fat-tailed dunnart
Spermatogonia	Spermatogonia	1185.37	14.015	17.5	0.302978	Fat-tailed dunnart
Spermatogonia	Spermatogonia	708.89	24.69	26	0.450139	Fat-tailed dunnart
Spermatogonia	Spermatogonia	864.62	31.46	28	0.484765	Fat-tailed dunnart
Spermatogonia	Spermatogonia	498.98	34.54	23	0.398199	Fat-tailed dunnart
Spermatogonia	Spermatogonia	301.48	27.33	22	0.380886	Fat-tailed dunnart
Spermatogonia	Spermatogonia	925.56	23.5	31	0.536704	Fat-tailed dunnart
Spermatogonia	Spermatogonia	2128.75	35.41	42	0.727147	Fat-tailed dunnart
Spermatogonia	Spermatogonia	793.64	16.805	23.5	0.406856	Fat-tailed dunnart
Spermatogonia	Spermatogonia	793.64	16.805	23.5	0.406856	Fat-tailed dunnart
Spermatogonia	Spermatogonia	1863.8	15.155	25.5	0.441482	Fat-tailed dunnart
Spermatogonia	Spermatogonia	1863.8	15.155	25.5	0.441482	Fat-tailed dunnart
Spermatogonia	Spermatogonia	609.63	26.17	34	0.588643	Fat-tailed dunnart
Spermatogonia	Spermatogonia	2315.07	29.03	39	0.675208	Fat-tailed dunnart
Spermatogonia	Spermatogonia	1506.96	25.27	37	0.640582	Fat-tailed dunnart
Spermatogonia	Spermatogonia	1320.32	30.14	34	0.588643	Fat-tailed dunnart
Spermatogonia	Spermatogonia	236.36	25.18	20	0.34626	Fat-tailed dunnart
Spermatogonia	Spermatogonia	282.22	26.69	26	0.450139	Fat-tailed dunnart
Spermatogonia	Spermatogonia	206.03	53.9	40	0.692521	Fat-tailed dunnart
Spermatogonia	Spermatogonia	195.56	21.57	28	0.484765	Fat-tailed dunnart
Spermatogonia	Spermatogonia	398.79	21.73	20	0.34626	Fat-tailed dunnart
Spermatogonia	Spermatogonia	718.22	47.95	50	0.865651	Fat-tailed dunnart
Spermatogonia	Spermatogonia	260.46	24.21	23	0.398199	Fat-tailed dunnart
Spermatogonia	Spermatogonia	319.66	25.08	28	0.484765	Fat-tailed dunnart
Spermatogonia	Spermatogonia	1764.44	27	35	0.605956	Fat-tailed dunnart
Spermatogonia	Spermatogonia	1213.04	25.03	34	0.588643	Fat-tailed dunnart
Spermatogonia	Spermatogonia	662.875	11.84	21	0.363573	Fat-tailed dunnart
Spermatogonia	Spermatogonia	662.875	11.84	21	0.363573	Fat-tailed dunnart
Spermatogonia	Spermatogonia	1881.59	25.71	34	0.588643	Fat-tailed dunnart
Spermatogonia	Spermatogonia	72.83	27.59	19	0.328947	Fat-tailed dunnart
Spermatogonia	Spermatogonia	2864.44	29.25	32	0.554017	Fat-tailed dunnart
Spermatogonia	Spermatogonia	148.15	27.33	22	0.380886	Fat-tailed dunnart
Spermatogonia	Spermatogonia	834.36	25.27	28	0.484765	Fat-tailed dunnart
Spermatogonia	Spermatogonia	1712.29	25.78	39	0.675208	Fat-tailed dunnart
Spermatogonia	Spermatogonia	296.11	27.13	22	0.380886	Fat-tailed dunnart
Spermatogonia	Spermatogonia	1736.51	44.64	32	0.554017	Fat-tailed dunnart
Spermatogonia	Spermatogonia	421.76	22.79	23	0.398199	Fat-tailed dunnart
Spermatogonia	Spermatogonia	670.6	23.12	28	0.484765	Fat-tailed dunnart
Spermatogonia	Spermatogonia	1631.43	24.46	32	0.554017	Fat-tailed dunnart
Spermatogonia	Spermatogonia	633.33	23.29	24	0.415512	Fat-tailed dunnart
Spermatogonia	Spermatogonia	417.78	25.42	26	0.450139	Fat-tailed dunnart
Spermatogonia	Spermatogonia	975.56	24	29	0.502078	Fat-tailed dunnart
Spermatogonia	Spermatogonia	264.54	23.04	23	0.398199	Fat-tailed dunnart
Spermatogonia	Spermatogonia	2186.39	23.625	22.5	0.389543	Fat-tailed dunnart
Spermatogonia	Spermatogonia	2186.39	23.625	22.5	0.389543	Fat-tailed dunnart
Spermatogonia	Spermatogonia	1571.66	24.605	25.5	0.441482	Fat-tailed dunnart
Spermatogonia	Spermatogonia	1571.66	24.605	25.5	0.441482	Fat-tailed dunnart
Spermatogonia	Spermatogonia	841	25.185	16.5	0.285665	Fat-tailed dunnart
Spermatogonia	Spermatogonia	841	25.185	16.5	0.285665	Fat-tailed dunnart
Spermatogonia	Spermatogonia	274.79	22.65	25	0.432825	Fat-tailed dunnart
Spermatogonia	Spermatogonia	2246.67	26.25	32	0.554017	Fat-tailed dunnart
Spermatogonia	Spermatogonia	899.41	23.57	34	0.588643	Fat-tailed dunnart
Spermatogonia	Spermatogonia	1558.33	23.25	31	0.536704	Fat-tailed dunnart
Spermatogonia	Spermatogonia	1032.03	24.94	41	0.709834	Fat-tailed dunnart
Spermatogonia	Spermatogonia	2541.59	27.43	31	0.536704	Fat-tailed dunnart
Spermatogonia	Spermatogonia	204.89	22.05	16	0.277008	Fat-tailed dunnart
Spermatogonia	Spermatogonia	680	27.77	26	0.450139	Fat-tailed dunnart
Spermatogonia	Spermatogonia	173.74	23.73	19	0.328947	Fat-tailed dunnart
Spermatogonia	Spermatogonia	906.94	27.88	25	0.432825	Fat-tailed dunnart
Spermatogonia	Spermatogonia	897.18	25.27	27	0.467452	Fat-tailed dunnart
Spermatogonia	Spermatogonia	1100.48	28.93	31	0.536704	Fat-tailed dunnart
Spermatogonia	Spermatogonia	2947.3	28.43	32	0.554017	Fat-tailed dunnart
Spermatogonia	Spermatogonia	181.54	19.69	25	0.432825	Fat-tailed dunnart
Spermatogonia	Spermatogonia	495.56	24	29	0.502078	Fat-tailed dunnart
Spermatogonia	Spermatogonia	2880.68	28.23	29	0.502078	Fat-tailed dunnart
Spermatogonia	Spermatogonia	755.56	22	23	0.398199	Fat-tailed dunnart
Spermatogonia	Spermatogonia	328.89	22.88	24	0.415512	Fat-tailed dunnart
Spermatogonia	Spermatogonia	354.22	22.1	16	0.277008	Fat-tailed dunnart
Spermatogonia	Spermatogonia	992.14	24.27	28	0.484765	Fat-tailed dunnart
Spermatogonia	Spermatogonia	1766.67	24	38	0.657895	Fat-tailed dunnart
Spermatogonia	Spermatogonia	1164.44	35.25	24	0.415512	Fat-tailed dunnart
Spermatogonia	Spermatogonia	825.3	32.31	28	0.484765	Fat-tailed dunnart
Spermatogonia	Spermatogonia	310.94	21.54	28	0.484765	Fat-tailed dunnart
Spermatogonia	Spermatogonia	560.6	19.73	27	0.467452	Fat-tailed dunnart
Spermatogonia	Spermatogonia	1658.89	13.065	20	0.34626	Fat-tailed dunnart
Spermatogonia	Spermatogonia	1658.89	13.065	20	0.34626	Fat-tailed dunnart
Spermatogonia	Spermatogonia	2180.8	22.205	22.5	0.389543	Fat-tailed dunnart
Spermatogonia	Spermatogonia	2180.8	22.205	22.5	0.389543	Fat-tailed dunnart
Spermatogonia	Spermatogonia	1975.3	35.04	29	0.502078	Fat-tailed dunnart
Spermatogonia	Spermatogonia	1847.22	18.18	17.5	0.302978	Fat-tailed dunnart
Spermatogonia	Spermatogonia	1847.22	18.18	17.5	0.302978	Fat-tailed dunnart
Spermatogonia	Spermatogonia	434.07	38.17	22	0.380886	Fat-tailed dunnart
Spermatogonia	Spermatogonia	2559.63	32.43	35	0.605956	Fat-tailed dunnart
Spermatogonia	Spermatogonia	2030.17	34.81	29	0.502078	Fat-tailed dunnart
Spermatogonia	Spermatogonia	382.13	32.96	23	0.398199	Fat-tailed dunnart
Spermatogonia	Spermatogonia	148.89	20	21	0.363573	Fat-tailed dunnart
Spermatogonia	Spermatogonia	664.53	22.65	29	0.502078	Fat-tailed dunnart
Spermatogonia	Spermatogonia	781.37	29.69	28	0.484765	Fat-tailed dunnart
Spermatogonia	Spermatogonia	1446.03	27.82	32	0.554017	Fat-tailed dunnart
Spermatogonia	Spermatogonia	352.22	29.5	25	0.432825	Fat-tailed dunnart
Spermatogonia	Spermatogonia	584.44	29	28	0.484765	Fat-tailed dunnart
Spermatogonia	Spermatogonia	940.95	30.89	32	0.554017	Fat-tailed dunnart
Spermatogonia	Spermatogonia	2500.08	33.39	33	0.57133	Fat-tailed dunnart
Spermatogonia	Spermatogonia	601.76	23.21	25	0.432825	Fat-tailed dunnart
Spermatogonia	Spermatogonia	2415.23	14.47	23	0.398199	Fat-tailed dunnart
Spermatogonia	Spermatogonia	2415.23	14.47	23	0.398199	Fat-tailed dunnart
Spermatogonia	Spermatogonia	582.22	25.77	26	0.450139	Fat-tailed dunnart
Spermatogonia	Spermatogonia	580	23.35	26	0.450139	Fat-tailed dunnart
Spermatogonia	Spermatogonia	1098.63	26.31	28	0.484765	Fat-tailed dunnart
Spermatogonia	Spermatogonia	1077.13	27.29	25	0.432825	Fat-tailed dunnart
Spermatogonia	Spermatogonia	1671.2	13.62	24.5	0.424169	Fat-tailed dunnart
Spermatogonia	Spermatogonia	1671.2	13.62	24.5	0.424169	Fat-tailed dunnart
Spermatogonia	Spermatogonia	1016.15	29.73	27	0.467452	Fat-tailed dunnart
Spermatogonia	Spermatogonia	1441.62	25.42	29	0.502078	Fat-tailed dunnart
Spermatogonia	Spermatogonia	1421.67	22.46	35	0.605956	Fat-tailed dunnart
Spermatogonia	Spermatogonia	63.33	18.9	15	0.259695	Fat-tailed dunnart
Spermatogonia	Spermatogonia	583.92	22.18	41	0.709834	Fat-tailed dunnart
Spermatogonia	Spermatogonia	1326.37	24.27	38	0.657895	Fat-tailed dunnart
Spermatogonia	Spermatogonia	292.41	20.58	23	0.398199	Fat-tailed dunnart
Spermatogonia	Spermatogonia	1121.57	22.38	40	0.692521	Fat-tailed dunnart
Spermatogonia	Spermatogonia	2583.7	25.08	52	0.900277	Fat-tailed dunnart
Spermatogonia	Spermatogonia	77.78	18.2	15	0.259695	Fat-tailed dunnart
Spermatogonia	Spermatogonia	1553.33	22.75	40	0.692521	Fat-tailed dunnart
Spermatogonia	Spermatogonia	1857.86	25.39	33	0.57133	Fat-tailed dunnart
Spermatogonia	Spermatogonia	88.69	21.23	18	0.311634	Fat-tailed dunnart
Spermatogonia	Spermatogonia	306.67	23	23	0.398199	Fat-tailed dunnart
Spermatogonia	Spermatogonia	1147.19	14.095	24.5	0.424169	Fat-tailed dunnart
Spermatogonia	Spermatogonia	1147.19	14.095	24.5	0.424169	Fat-tailed dunnart
Spermatogonia	Spermatogonia	270.19	19.79	22	0.380886	Fat-tailed dunnart
Spermatogonia	Spermatogonia	616.75	21.23	28	0.484765	Fat-tailed dunnart
Spermatogonia	Spermatogonia	720	32	34	0.588643	Fat-tailed dunnart
Spermatogonia	Spermatogonia	640.655	10.97	22	0.380886	Fat-tailed dunnart
Spermatogonia	Spermatogonia	640.655	10.97	22	0.380886	Fat-tailed dunnart
Spermatogonia	Spermatogonia	461.03	21.54	27	0.467452	Fat-tailed dunnart
Spermatogonia	Spermatogonia	906.67	21.25	32	0.554017	Fat-tailed dunnart
Spermatogonia	Spermatogonia	752	22.9	34	0.588643	Fat-tailed dunnart
Spermatogonia	Spermatogonia	69.44	21.05	15	0.259695	Fat-tailed dunnart
Spermatogonia	Spermatogonia	819.91	20.35	29	0.502078	Fat-tailed dunnart
Spermatogonia	Spermatogonia	551.56	21.63	36	0.623269	Fat-tailed dunnart
Spermatogonia	Spermatogonia	340	21.29	24	0.415512	Fat-tailed dunnart
Spermatogonia	Spermatogonia	310.77	20.15	27	0.467452	Fat-tailed dunnart
Spermatogonia	Spermatogonia	41.67	18.75	15	0.259695	Fat-tailed dunnart
Spermatogonia	Spermatogonia	656.24	21.85	28	0.484765	Fat-tailed dunnart
Spermatogonia	Spermatogonia	1066.98	23.46	32	0.554017	Fat-tailed dunnart
Spermatogonia	Spermatogonia	512.14	22.18	31	0.536704	Fat-tailed dunnart
Spermatogonia	Spermatogonia	252.39	25.58	25	0.432825	Fat-tailed dunnart
Spermatogonia	Spermatogonia	2065.78	28.27	39	0.675208	Fat-tailed dunnart
Spermatogonia	Spermatogonia	132.78	22.88	22	0.380886	Fat-tailed dunnart
Spermatogonia	Spermatogonia	2287.43	24.41	41	0.709834	Fat-tailed dunnart
Spermatogonia	Spermatogonia	1273.02	23.29	32	0.554017	Fat-tailed dunnart
Spermatogonia	Spermatogonia	1133.61	12.235	20	0.34626	Fat-tailed dunnart
Spermatogonia	Spermatogonia	1072.22	27.1	35	0.605956	Fat-tailed dunnart
Spermatogonia	Spermatogonia	847.06	13.31	24	0.415512	Fat-tailed dunnart
Spermatogonia	Spermatogonia	847.06	13.31	24	0.415512	Fat-tailed dunnart
Spermatogonia	Spermatogonia	657.14	21.43	31	0.536704	Fat-tailed dunnart
Spermatogonia	Spermatogonia	1674.96	27.53	38	0.657895	Fat-tailed dunnart
Spermatogonia	Spermatogonia	727.46	23.32	30	0.519391	Fat-tailed dunnart
Spermatogonia	Spermatogonia	1443.96	22.47	41	0.709834	Fat-tailed dunnart
Spermatogonia	Spermatogonia	200	24.19	26	0.450139	Fat-tailed dunnart
Spermatogonia	Spermatogonia	714.76	21.68	30	0.519391	Fat-tailed dunnart
Spermatogonia	Spermatogonia	934.96	26.42	29	0.502078	Fat-tailed dunnart
Spermatogonia	Spermatogonia	875.24	21.79	32	0.554017	Fat-tailed dunnart
Spermatogonia	Spermatogonia	1043.92	11.86	20.5	0.354917	Fat-tailed dunnart
Spermatogonia	Spermatogonia	551.305	14.325	21.5	0.37223	Fat-tailed dunnart
Spermatogonia	Spermatogonia	551.305	14.325	21.5	0.37223	Fat-tailed dunnart
Spermatogonia	Spermatogonia	1757.26	27.12	28	0.484765	Fat-tailed dunnart
Spermatogonia	Spermatogonia	3754.65	26.16	41	0.709834	Fat-tailed dunnart
Spermatogonia	Spermatogonia	344.165	10.64	20	0.34626	Fat-tailed dunnart
Spermatogonia	Spermatogonia	344.165	10.64	20	0.34626	Fat-tailed dunnart
Spermatocyte I	Zygotene	562.14	18.04	27	0.467452	Fat-tailed dunnart
Spermatocyte I	Zygotene	3217.5	27.81	42	0.727147	Fat-tailed dunnart
Spermatocyte I	Zygotene	6707.4	94.73	101	1.74861	Fat-tailed dunnart
Spermatocyte I	Zygotene	5310.06	30.76	49	0.848338	Fat-tailed dunnart
Spermatocyte I	Zygotene	1983.33	51.54	75	1.29848	Fat-tailed dunnart
Spermatocyte I	Zygotene	845	26.63	38	0.657895	Fat-tailed dunnart
Spermatocyte I	Zygotene	2025.06	65.39	72	1.24654	Fat-tailed dunnart
Spermatocyte I	Zygotene	5126.67	27.25	60	1.03878	Fat-tailed dunnart
Spermatocyte I	Zygotene	2933.92	28.97	43	0.74446	Fat-tailed dunnart
Spermatocyte I	Zygotene	2879.56	25.7	56	0.969529	Fat-tailed dunnart
Spermatocyte I	Zygotene	2520.3	29.32	52	0.900277	Fat-tailed dunnart
Spermatocyte I	Zygotene	3301.06	22.98	62	1.07341	Fat-tailed dunnart
Spermatocyte I	Zygotene	2844.44	25.33	36	0.623269	Fat-tailed dunnart
Spermatocyte I	Zygotene	1952.22	25.06	45	0.779086	Fat-tailed dunnart
Spermatocyte I	Zygotene	1837.93	29.87	38	0.657895	Fat-tailed dunnart
Spermatocyte I	Zygotene	12343.8	189.04	200	3.4626	Fat-tailed dunnart
Spermatocyte I	Zygotene	2586.93	30.31	61	1.05609	Fat-tailed dunnart
Spermatocyte I	Zygotene	3401.46	59.59	56	0.969529	Fat-tailed dunnart
Spermatocyte I	Zygotene	4091.98	22.89	68	1.17729	Fat-tailed dunnart
Spermatocyte I	Zygotene	5554.31	28.56	76	1.31579	Fat-tailed dunnart
Spermatocyte I	Zygotene	1778.32	50.97	80	1.38504	Fat-tailed dunnart
Spermatocyte I	Zygotene	1987.18	56.34	68	1.17729	Fat-tailed dunnart
Spermatocyte I	Zygotene	524.44	20.69	26	0.450139	Fat-tailed dunnart
Spermatocyte I	Zygotene	388.89	19.96	24	0.415512	Fat-tailed dunnart
Spermatocyte I	Zygotene	1952	23.1	36	0.623269	Fat-tailed dunnart
Spermatocyte I	Zygotene	401.02	18.46	23	0.398199	Fat-tailed dunnart
Spermatocyte I	Zygotene	700.4	22.82	29	0.502078	Fat-tailed dunnart
Spermatocyte I	Zygotene	2027.64	24.16	42	0.727147	Fat-tailed dunnart
Spermatocyte I	Zygotene	18216.5	74	172	2.97784	Fat-tailed dunnart
Spermatocyte I	Zygotene	4806.89	22.05	58	1.00416	Fat-tailed dunnart
Spermatocyte I	Zygotene	14573.1	58.995	160.5	2.77874	Fat-tailed dunnart
Spermatocyte I	Zygotene	14573.1	58.995	160.5	2.77874	Fat-tailed dunnart
Spermatocyte I	Zygotene	9868.81	27.96	107	1.85249	Fat-tailed dunnart
Spermatocyte I	Zygotene	7920.39	95.67	180	3.11634	Fat-tailed dunnart
Spermatocyte I	Zygotene	10790.8	26.36	103	1.78324	Fat-tailed dunnart
Spermatocyte I	Zygotene	11146.5	32.74	76	1.31579	Fat-tailed dunnart
Spermatocyte I	Zygotene	7790.53	31.63	59	1.02147	Fat-tailed dunnart
Spermatocyte I	Zygotene	8197.07	54.32	110	1.90443	Fat-tailed dunnart
Spermatocyte I	Zygotene	7204.44	33	54	0.934903	Fat-tailed dunnart
Spermatocyte I	Zygotene	5187.23	63.47	107	1.85249	Fat-tailed dunnart
Spermatocyte I	Zygotene	8786.01	30.16	71	1.22922	Fat-tailed dunnart
Spermatocyte I	Zygotene	6332.22	26.5	49	0.848338	Fat-tailed dunnart
Spermatocyte I	Zygotene	4626.97	71.02	108	1.86981	Fat-tailed dunnart
Spermatocyte I	Zygotene	6960.21	25.6	62	1.07341	Fat-tailed dunnart
Spermatocyte I	Zygotene	5467.01	25.77	57	0.986842	Fat-tailed dunnart
Spermatocyte I	Zygotene	5258.9	21.3	120	2.07756	Fat-tailed dunnart
Spermatocyte I	Zygotene	6177.4	55.85	101	1.74861	Fat-tailed dunnart
Spermatocyte I	Zygotene	7857.69	36.735	63.5	1.09938	Fat-tailed dunnart
Spermatocyte I	Zygotene	7857.69	36.735	63.5	1.09938	Fat-tailed dunnart
Spermatocyte I	Zygotene	5917.48	56.03	95	1.64474	Fat-tailed dunnart
Spermatocyte I	Zygotene	5433.56	50.77	70	1.21191	Fat-tailed dunnart
Spermatocyte I	Zygotene	2782.05	22.61	53	0.91759	Fat-tailed dunnart
Spermatocyte I	Zygotene	1884.15	22.27	38	0.657895	Fat-tailed dunnart
Spermatocyte I	Zygotene	5499.23	62.63	117	2.02562	Fat-tailed dunnart
Spermatocyte I	Zygotene	8193.34	58.82	83	1.43698	Fat-tailed dunnart
Spermatocyte I	Zygotene	6197.94	28.21	65	1.12535	Fat-tailed dunnart
Spermatocyte I	Zygotene	3059.08	82.3	114	1.97368	Fat-tailed dunnart
Spermatocyte I	Zygotene	4787.06	21.56	48	0.831025	Fat-tailed dunnart
Spermatocyte I	Zygotene	1886.67	18.17	60	1.03878	Fat-tailed dunnart
Spermatocyte I	Zygotene	10991.1	23.8	145	2.51039	Fat-tailed dunnart
Spermatocyte I	Zygotene	1937.06	45.8	92	1.5928	Fat-tailed dunnart
Spermatocyte I	Zygotene	2190.71	22.61	72	1.24654	Fat-tailed dunnart
Spermatocyte I	Zygotene	2102.22	21	52	0.900277	Fat-tailed dunnart
Spermatocyte I	Zygotene	2645.63	18.53	89	1.54086	Fat-tailed dunnart
Spermatocyte I	Zygotene	959.79	22.16	39	0.675208	Fat-tailed dunnart
Spermatocyte I	Zygotene	2945.93	22.17	38	0.657895	Fat-tailed dunnart
Spermatocyte I	Zygotene	3557.41	21.17	37	0.640582	Fat-tailed dunnart
Spermatocyte I	Zygotene	3063.01	56.06	45	0.779086	Fat-tailed dunnart
Spermatocyte I	Zygotene	2304.89	19.3	36	0.623269	Fat-tailed dunnart
Spermatocyte I	Zygotene	2486.95	10.925	37	0.640582	Fat-tailed dunnart
Spermatocyte I	Zygotene	4133.15	21.53	57	0.986842	Fat-tailed dunnart
Spermatocyte I	Zygotene	5771.85	28.33	50	0.865651	Fat-tailed dunnart
Spermatocyte I	Zygotene	2361.75	26.66	52	0.900277	Fat-tailed dunnart
Spermatocyte I	Zygotene	1939.63	17.63	35	0.605956	Fat-tailed dunnart
Spermatocyte I	Zygotene	3333.75	23.44	43	0.74446	Fat-tailed dunnart
Spermatocyte I	Zygotene	1508	24.6	54	0.934903	Fat-tailed dunnart
Spermatocyte I	Zygotene	7240.56	28.88	105	1.81787	Fat-tailed dunnart
Spermatocyte I	Zygotene	555.33	31.7	33	0.57133	Fat-tailed dunnart
Spermatocyte I	Zygotene	1732.22	26.5	39	0.675208	Fat-tailed dunnart
Spermatocyte I	Zygotene	6759.51	31.78	53	0.91759	Fat-tailed dunnart
Spermatocyte I	Zygotene	6940.39	34.68	50	0.865651	Fat-tailed dunnart
Spermatocyte I	Zygotene	2313.46	11.56	16.6667	0.28855	Fat-tailed dunnart
Spermatocyte I	Zygotene	2313.46	11.56	16.6667	0.28855	Fat-tailed dunnart
Spermatocyte I	Zygotene	2313.46	11.56	16.6667	0.28855	Fat-tailed dunnart
Spermatocyte I	Zygotene	6177.03	38.14	116	2.00831	Fat-tailed dunnart
Spermatocyte I	Zygotene	3088.51	19.07	58	1.00416	Fat-tailed dunnart
Spermatocyte I	Zygotene	3088.51	19.07	58	1.00416	Fat-tailed dunnart
Spermatocyte I	Zygotene	2901.85	31.17	37	0.640582	Fat-tailed dunnart
Spermatocyte I	Zygotene	14632.9	43.23	108	1.86981	Fat-tailed dunnart
Spermatocyte I	Zygotene	7316.44	21.615	54	0.934903	Fat-tailed dunnart
Spermatocyte I	Zygotene	7316.44	21.615	54	0.934903	Fat-tailed dunnart
Spermatocyte I	Zygotene	7554.59	35.93	70	1.21191	Fat-tailed dunnart
Spermatocyte I	Zygotene	3777.3	17.965	35	0.605956	Fat-tailed dunnart
Spermatocyte I	Zygotene	3777.3	17.965	35	0.605956	Fat-tailed dunnart
Spermatocyte I	Zygotene	6461.11	34.83	60	1.03878	Fat-tailed dunnart
Spermatocyte I	Early pachytene	5324.09	24.7	95	1.64474	Fat-tailed dunnart
Spermatocyte I	Early pachytene	3586.87	33.18	60	1.03878	Fat-tailed dunnart
Spermatocyte I	Early pachytene	5625.56	29.98	66	1.14266	Fat-tailed dunnart
Spermatocyte I	Early pachytene	2308.63	40.47	47	0.813712	Fat-tailed dunnart
Spermatocyte I	Early pachytene	7298.12	34.02	109	1.88712	Fat-tailed dunnart
Spermatocyte I	Early pachytene	11627.3	43.8	227	3.93006	Fat-tailed dunnart
Spermatocyte I	Early pachytene	9922.31	54.46	182	3.15097	Fat-tailed dunnart
Spermatocyte I	Early pachytene	3374.34	54.76	110	1.90443	Fat-tailed dunnart
Spermatocyte I	Early pachytene	2720.41	64.41	132	2.28532	Fat-tailed dunnart
Spermatocyte I	Early pachytene	11069.5	86.41	231	3.99931	Fat-tailed dunnart
Spermatocyte I	Early pachytene	7953.9	162.37	244	4.22438	Fat-tailed dunnart
Spermatocyte I	Early pachytene	7966.57	84.44	193	3.34141	Fat-tailed dunnart
Spermatocyte I	Early pachytene	8930.71	27.77	94	1.62742	Fat-tailed dunnart
Spermatocyte I	Early pachytene	7048.98	50.63	74	1.28116	Fat-tailed dunnart
Spermatocyte I	Early pachytene	2971.52	41.53	96	1.66205	Fat-tailed dunnart
Spermatocyte I	Early pachytene	22192.5	173.34	257	4.44945	Fat-tailed dunnart
Spermatocyte I	Early pachytene	5527.07	48.53	109	1.88712	Fat-tailed dunnart
Spermatocyte I	Early pachytene	7211.48	64.17	88	1.52355	Fat-tailed dunnart
Spermatocyte I	Early pachytene	7384.27	36.29	59	1.02147	Fat-tailed dunnart
Spermatocyte I	Early pachytene	9961.19	81.95	87	1.50623	Fat-tailed dunnart
Spermatocyte I	Early pachytene	3726.44	23.1	61	1.05609	Fat-tailed dunnart
Spermatocyte I	Early pachytene	6903.64	31.86	55	0.952216	Fat-tailed dunnart
Spermatocyte I	Early pachytene	8132.43	47.07	88	1.52355	Fat-tailed dunnart
Spermatocyte I	Early pachytene	7333.1	59.73	106	1.83518	Fat-tailed dunnart
Spermatocyte I	Early pachytene	5402.08	27.81	69	1.1946	Fat-tailed dunnart
Spermatocyte I	Early pachytene	7340.41	28.66	59	1.02147	Fat-tailed dunnart
Spermatocyte I	Early pachytene	5965.75	27.76	68	1.17729	Fat-tailed dunnart
Spermatocyte I	Early pachytene	5475.78	69.56	121	2.09488	Fat-tailed dunnart
Spermatocyte I	Early pachytene	4821.45	100.22	184	3.1856	Fat-tailed dunnart
Spermatocyte I	Early pachytene	11891	113.16	187	3.23753	Fat-tailed dunnart
Spermatocyte I	Early pachytene	6171.8	54.76	105	1.81787	Fat-tailed dunnart
Spermatocyte I	Early pachytene	8865.5	29.63	61	1.05609	Fat-tailed dunnart
Spermatocyte I	Early pachytene	4674.3	124.45	117	2.02562	Fat-tailed dunnart
Spermatocyte I	Early pachytene	5727.35	32.13	60	1.03878	Fat-tailed dunnart
Spermatocyte I	Early pachytene	7308.48	27.59	68	1.17729	Fat-tailed dunnart
Spermatocyte I	Early pachytene	7820.48	24.41	92	1.5928	Fat-tailed dunnart
Spermatocyte I	Early pachytene	8374.5	28.74	59	1.02147	Fat-tailed dunnart
Spermatocyte I	Early pachytene	3893.64	26.66	71	1.22922	Fat-tailed dunnart
Spermatocyte I	Early pachytene	6714.04	38.3	70	1.21191	Fat-tailed dunnart
Spermatocyte I	Early pachytene	3619.77	43.95	55	0.952216	Fat-tailed dunnart
Spermatocyte I	Early pachytene	12423.8	29.2867	83.6667	1.44852	Fat-tailed dunnart
Spermatocyte I	Early pachytene	12423.8	29.2867	83.6667	1.44852	Fat-tailed dunnart
Spermatocyte I	Early pachytene	12423.8	29.2867	83.6667	1.44852	Fat-tailed dunnart
Spermatocyte I	Early pachytene	10506.4	216.28	227	3.93006	Fat-tailed dunnart
Spermatocyte I	Early pachytene	1806.3	28.17	37	0.640582	Fat-tailed dunnart
Spermatocyte I	Early pachytene	5436.55	107.16	107	1.85249	Fat-tailed dunnart
Spermatocyte I	Early pachytene	8593.61	32.93	95	1.64474	Fat-tailed dunnart
Spermatocyte I	Early pachytene	8593.61	32.93	95	1.64474	Fat-tailed dunnart
Spermatocyte I	Early pachytene	5443.84	81.16	81	1.40235	Fat-tailed dunnart
Spermatocyte I	Early pachytene	6179.37	97.06	101	1.74861	Fat-tailed dunnart
Spermatocyte I	Early pachytene	3112.81	19.11	31	0.536704	Fat-tailed dunnart
Spermatocyte I	Early pachytene	3112.81	19.11	31	0.536704	Fat-tailed dunnart
Spermatocyte I	Early pachytene	3112.81	19.11	31	0.536704	Fat-tailed dunnart
Spermatocyte I	Early pachytene	8137.58	29.3	68	1.17729	Fat-tailed dunnart
Spermatocyte I	Early pachytene	11921.4	70.25	130	2.25069	Fat-tailed dunnart
Spermatocyte I	Early pachytene	4563.49	70.71	84	1.45429	Fat-tailed dunnart
Spermatocyte I	Early pachytene	8609.45	86.89	90	1.55817	Fat-tailed dunnart
Spermatocyte I	Early pachytene	9195.26	86.22	129	2.23338	Fat-tailed dunnart
Spermatocyte I	Early pachytene	16089.4	38.24	111	1.92175	Fat-tailed dunnart
Spermatocyte I	Early pachytene	7010	36.5	55	0.952216	Fat-tailed dunnart
Spermatocyte I	Early pachytene	10957	39.52	111	1.92175	Fat-tailed dunnart
Spermatocyte I	Early pachytene	17011.1	90.46	209	3.61842	Fat-tailed dunnart
Spermatocyte I	Early pachytene	2641.52	38.95	59	1.02147	Fat-tailed dunnart
Spermatocyte I	Early pachytene	18227.5	35.78	144	2.49307	Fat-tailed dunnart
Spermatocyte I	Early pachytene	8689.78	35.8	102	1.76593	Fat-tailed dunnart
Spermatocyte I	Early pachytene	8743.89	32.13	98	1.69668	Fat-tailed dunnart
Spermatocyte I	Early pachytene	6044.4	92.86	125	2.16413	Fat-tailed dunnart
Spermatocyte I	Early pachytene	6362.17	35.53	61	1.05609	Fat-tailed dunnart
Spermatocyte I	Early pachytene	7289.31	30.81	64	1.10803	Fat-tailed dunnart
Spermatocyte I	Early pachytene	6025.03	33.79	63	1.09072	Fat-tailed dunnart
Spermatocyte I	Early pachytene	1886.04	54.37	75	1.29848	Fat-tailed dunnart
Spermatocyte I	Early pachytene	3892.38	44.33	84	1.45429	Fat-tailed dunnart
Spermatocyte I	Early pachytene	6038.04	77.405	126.5	2.1901	Fat-tailed dunnart
Spermatocyte I	Early pachytene	6038.04	77.405	126.5	2.1901	Fat-tailed dunnart
Spermatocyte I	Early pachytene	4220.97	113.31	114	1.97368	Fat-tailed dunnart
Spermatocyte I	Early pachytene	3433.28	37.7	71	1.22922	Fat-tailed dunnart
Spermatocyte I	Early pachytene	7451.49	26.87	118	2.04294	Fat-tailed dunnart
Spermatocyte I	Early pachytene	4315.04	90.85	74	1.28116	Fat-tailed dunnart
Spermatocyte I	Early pachytene	7956.83	73.28	143	2.47576	Fat-tailed dunnart
Spermatocyte I	Early pachytene	10157.7	176.08	284	4.9169	Fat-tailed dunnart
Spermatocyte I	Early pachytene	4083.22	96.57	148	2.56233	Fat-tailed dunnart
Spermatocyte I	Early pachytene	4888.26	75.91	95	1.64474	Fat-tailed dunnart
Spermatocyte I	Early pachytene	2047.69	80.11	86	1.48892	Fat-tailed dunnart
Spermatocyte I	Early pachytene	6317.39	40.24	76	1.31579	Fat-tailed dunnart
Spermatocyte I	Early pachytene	6381.01	92.9	193	3.34141	Fat-tailed dunnart
Spermatocyte I	Early pachytene	18638.8	62.04	170	2.94321	Fat-tailed dunnart
Spermatocyte I	Early pachytene	4290.93	18.14	51	0.882964	Fat-tailed dunnart
Spermatocyte I	Early pachytene	14485.2	52.79	162	2.80471	Fat-tailed dunnart
Spermatocyte I	Early pachytene	14485.2	52.79	162	2.80471	Fat-tailed dunnart
Spermatocyte I	Early pachytene	9118.33	28.71	90	1.55817	Fat-tailed dunnart
Spermatocyte I	Early pachytene	7771.98	86.73	176	3.04709	Fat-tailed dunnart
Spermatocyte I	Early pachytene	10701.6	26.98	94	1.62742	Fat-tailed dunnart
Spermatocyte I	Early pachytene	8035.65	49.62	77	1.3331	Fat-tailed dunnart
Spermatocyte I	Early pachytene	9072.59	64.28	132	2.28532	Fat-tailed dunnart
Spermatocyte I	Early pachytene	7778.04	28.94	53	0.91759	Fat-tailed dunnart
Spermatocyte I	Early pachytene	13474.5	23.88	94	1.62742	Fat-tailed dunnart
Spermatocyte I	Early pachytene	6832.18	25.45	93	1.61011	Fat-tailed dunnart
Spermatocyte I	Early pachytene	9659.26	26.69	70	1.21191	Fat-tailed dunnart
Spermatocyte I	Early pachytene	6961.11	59.57	120	2.07756	Fat-tailed dunnart
Spermatocyte I	Early pachytene	25302.5	114.73	302	5.22853	Fat-tailed dunnart
Spermatocyte I	Early pachytene	6275.55	47.85	74	1.28116	Fat-tailed dunnart
Spermatocyte I	Early pachytene	7453.29	25.54	95	1.64474	Fat-tailed dunnart
Spermatocyte I	Early pachytene	2799.72	73.56	89	1.54086	Fat-tailed dunnart
Spermatocyte I	Early pachytene	8853.84	40.01	108	1.86981	Fat-tailed dunnart
Spermatocyte I	Early pachytene	9497.94	85.86	168	2.90859	Fat-tailed dunnart
Spermatocyte I	Early pachytene	10638.4	94.33	170	2.94321	Fat-tailed dunnart
Spermatocyte I	Early pachytene	6422.98	12.925	79.5	1.37639	Fat-tailed dunnart
Spermatocyte I	Early pachytene	6422.98	12.925	79.5	1.37639	Fat-tailed dunnart
Spermatocyte I	Early pachytene	7059.08	25.61	78	1.35042	Fat-tailed dunnart
Spermatocyte I	Early pachytene	5886.19	48.43	82	1.41967	Fat-tailed dunnart
Spermatocyte I	Early pachytene	2585.5	19.97	56	0.969529	Fat-tailed dunnart
Spermatocyte I	Early pachytene	9529.63	30.24	90	1.55817	Fat-tailed dunnart
Spermatocyte I	Early pachytene	6188.89	21.78	69	1.1946	Fat-tailed dunnart
Spermatocyte I	Early pachytene	6735.78	21.85	94	1.62742	Fat-tailed dunnart
Spermatocyte I	Early pachytene	11686.2	80.53	215	3.7223	Fat-tailed dunnart
Spermatocyte I	Early pachytene	18043.1	51.44	231	3.99931	Fat-tailed dunnart
Spermatocyte I	Early pachytene	9533.15	39.91	136	2.35457	Fat-tailed dunnart
Spermatocyte I	Early pachytene	5669.72	28.19	46	0.796399	Fat-tailed dunnart
Spermatocyte I	Early pachytene	10034	52.04	142	2.45845	Fat-tailed dunnart
Spermatocyte I	Early pachytene	6546.67	22.5	98	1.69668	Fat-tailed dunnart
Spermatocyte I	Early pachytene	7747.62	26.52	66	1.14266	Fat-tailed dunnart
Spermatocyte I	Early pachytene	8750.74	25.4	77	1.3331	Fat-tailed dunnart
Spermatocyte I	Early pachytene	6416.88	37.78	129	2.23338	Fat-tailed dunnart
Spermatocyte I	Early pachytene	2934.45	11	61.5	1.06475	Fat-tailed dunnart
Spermatocyte I	Early pachytene	2861.01	33.55	67	1.15997	Fat-tailed dunnart
Spermatocyte I	Early pachytene	2934.45	11	61.5	1.06475	Fat-tailed dunnart
Spermatocyte I	Early pachytene	1483.17	21.14	32	0.554017	Fat-tailed dunnart
Spermatocyte I	Early pachytene	6708.93	54.53	103	1.78324	Fat-tailed dunnart
Spermatocyte I	Early pachytene	12991.9	27.33	140	2.42382	Fat-tailed dunnart
Spermatocyte I	Early pachytene	7154.51	26.57	87	1.50623	Fat-tailed dunnart
Spermatocyte I	Early pachytene	3904.48	64.67	71	1.22922	Fat-tailed dunnart
Spermatocyte I	Early pachytene	7844.44	32.43	70	1.21191	Fat-tailed dunnart
Spermatocyte I	Early pachytene	9860.31	93.87	166	2.87396	Fat-tailed dunnart
Spermatocyte I	Early pachytene	7645.81	72.11	169	2.9259	Fat-tailed dunnart
Spermatocyte I	Early pachytene	8135.64	28.81	92	1.5928	Fat-tailed dunnart
Spermatocyte I	Early pachytene	10460.3	84.76	175	3.02978	Fat-tailed dunnart
Spermatocyte I	Early pachytene	10146.9	46.28	128	2.21607	Fat-tailed dunnart
Spermatocyte I	Early pachytene	4961.76	92.34	179	3.09903	Fat-tailed dunnart
Spermatocyte I	Early pachytene	8873.62	138.78	252	4.36288	Fat-tailed dunnart
Spermatocyte I	Early pachytene	5418.52	40.67	76	1.31579	Fat-tailed dunnart
Spermatocyte I	Early pachytene	5235.5	60.58	125	2.16413	Fat-tailed dunnart
Spermatocyte I	Early pachytene	6036.73	50.47	58	1.00416	Fat-tailed dunnart
Spermatocyte I	Early pachytene	5987.36	147	54	0.934903	Fat-tailed dunnart
Spermatocyte I	Early pachytene	5987.36	147	54	0.934903	Fat-tailed dunnart
Spermatocyte I	Early pachytene	3313.29	137.71	86	1.48892	Fat-tailed dunnart
Spermatocyte I	Early pachytene	5318.99	165.68	100	1.7313	Fat-tailed dunnart
Spermatocyte I	Early pachytene	6516.77	55.27	75	1.29848	Fat-tailed dunnart
Spermatocyte I	Early pachytene	5889.18	104.77	79	1.36773	Fat-tailed dunnart
Spermatocyte I	Early pachytene	6512.22	101.25	95	1.64474	Fat-tailed dunnart
Spermatocyte I	Early pachytene	5239.26	49.33	52	0.900277	Fat-tailed dunnart
Spermatocyte I	Early pachytene	2412.85	96.84	68	1.17729	Fat-tailed dunnart
Spermatocyte I	Early pachytene	4905.61	50.53	56	0.969529	Fat-tailed dunnart
Spermatocyte I	Early pachytene	5344	134.28	85	1.47161	Fat-tailed dunnart
Spermatocyte I	Early pachytene	4787.95	51.03	54	0.934903	Fat-tailed dunnart
Spermatocyte I	Early pachytene	7316.67	96.78	87	1.50623	Fat-tailed dunnart
Spermatocyte I	Early pachytene	8107.23	110.02	113	1.95637	Fat-tailed dunnart
Spermatocyte I	Late pachytene	5733.52	90.8533	211.333	3.65882	Fat-tailed dunnart
Spermatocyte I	Late pachytene	5733.52	90.8533	211.333	3.65882	Fat-tailed dunnart
Spermatocyte I	Late pachytene	5733.52	90.8533	211.333	3.65882	Fat-tailed dunnart
Spermatocyte I	Late pachytene	4816.14	67.73	158	2.73546	Fat-tailed dunnart
Spermatocyte I	Late pachytene	8212.5	90.52	199	3.44529	Fat-tailed dunnart
Spermatocyte I	Late pachytene	8247.93	26.77	101	1.74861	Fat-tailed dunnart
Spermatocyte I	Late pachytene	5884.73	128.35	168	2.90859	Fat-tailed dunnart
Spermatocyte I	Late pachytene	11493.3	124.79	388	6.71745	Fat-tailed dunnart
Spermatocyte I	Late pachytene	8205.21	82.43	210	3.63573	Fat-tailed dunnart
Spermatocyte I	Late pachytene	8480.04	166.91	360	6.23269	Fat-tailed dunnart
Spermatocyte I	Late pachytene	4013.15	78.65	296	5.12465	Fat-tailed dunnart
Spermatocyte I	Late pachytene	9170.33	38.69	246	4.259	Fat-tailed dunnart
Spermatocyte I	Late pachytene	16117.7	190.68	490	8.48338	Fat-tailed dunnart
Spermatocyte I	Late pachytene	2465.24	38.56	161	2.7874	Fat-tailed dunnart
Spermatocyte I	Late pachytene	6076.29	101.78	346	5.9903	Fat-tailed dunnart
Spermatocyte I	Late pachytene	2498.47	31.65	162	2.80471	Fat-tailed dunnart
Spermatocyte I	Late pachytene	5812.01	25.645	118	2.04294	Fat-tailed dunnart
Spermatocyte I	Late pachytene	5812.01	25.645	118	2.04294	Fat-tailed dunnart
Spermatocyte I	Late pachytene	10262.7	77.35	284	4.9169	Fat-tailed dunnart
Spermatocyte I	Late pachytene	7067.31	19.49	174	3.01247	Fat-tailed dunnart
Spermatocyte I	Late pachytene	6782.69	60.78	213	3.68767	Fat-tailed dunnart
Spermatocyte I	Late pachytene	8186.57	71.4	283	4.89958	Fat-tailed dunnart
Spermatocyte I	Late pachytene	6172.99	61.73	277	4.79571	Fat-tailed dunnart
Spermatocyte I	Late pachytene	6384.12	41.345	159.5	2.76143	Fat-tailed dunnart
Spermatocyte I	Late pachytene	6384.12	41.345	159.5	2.76143	Fat-tailed dunnart
Spermatocyte I	Late pachytene	10524	20.56	119	2.06025	Fat-tailed dunnart
Spermatocyte I	Late pachytene	7712.9	76.4	263	4.55332	Fat-tailed dunnart
Spermatocyte I	Late pachytene	11770.7	68.06	408	7.06371	Fat-tailed dunnart
Spermatocyte I	Late pachytene	9710.46	76.2	148	2.56233	Fat-tailed dunnart
Spermatocyte I	Late pachytene	12907.7	84.51	237	4.10319	Fat-tailed dunnart
Spermatocyte I	Late pachytene	8498.6	58.94	199	3.44529	Fat-tailed dunnart
Spermatocyte I	Late pachytene	7957.24	58.27	167	2.89127	Fat-tailed dunnart
Spermatocyte I	Late pachytene	3889.11	90.81	165	2.85665	Fat-tailed dunnart
Spermatocyte I	Late pachytene	7017.23	42.42	124	2.14681	Fat-tailed dunnart
Spermatocyte I	Late pachytene	4372.36	64.18	164	2.83934	Fat-tailed dunnart
Spermatocyte I	Late pachytene	10197.4	71.5	251	4.34557	Fat-tailed dunnart
Spermatocyte I	Late pachytene	10355.3	36.66	160.5	2.77874	Fat-tailed dunnart
Spermatocyte I	Late pachytene	10355.3	36.66	160.5	2.77874	Fat-tailed dunnart
Spermatocyte I	Late pachytene	6761.9	116.45	245	4.24169	Fat-tailed dunnart
Spermatocyte I	Late pachytene	7972.93	50.58	181	3.13366	Fat-tailed dunnart
Spermatocyte I	Late pachytene	4173.17	83.97	242	4.18975	Fat-tailed dunnart
Spermatocyte I	Late pachytene	11270.3	41.54	174	3.01247	Fat-tailed dunnart
Spermatocyte I	Late pachytene	3419.91	64.03	153	2.64889	Fat-tailed dunnart
Spermatocyte I	Late pachytene	8110.69	54.95	167	2.89127	Fat-tailed dunnart
Spermatocyte I	Late pachytene	16450	270.01	691	11.9633	Fat-tailed dunnart
Spermatocyte I	Late pachytene	8100.21	134.43	290	5.02078	Fat-tailed dunnart
Spermatocyte I	Late pachytene	15860	151.93	527	9.12396	Fat-tailed dunnart
Spermatocyte I	Late pachytene	3093.69	66.36	182	3.15097	Fat-tailed dunnart
Spermatocyte I	Late pachytene	6222.97	97.92	267	4.62258	Fat-tailed dunnart
Spermatocyte I	Late pachytene	24508.4	98.06	169	2.9259	Fat-tailed dunnart
Spermatocyte I	Late pachytene	4932.33	105.97	194	3.35873	Fat-tailed dunnart
Spermatocyte I	Late pachytene	4212.82	46.62	100	1.7313	Fat-tailed dunnart
Spermatocyte I	Late pachytene	4063.5	53.93	190	3.28947	Fat-tailed dunnart
Spermatocyte I	Late pachytene	5166.8	92.16	181	3.13366	Fat-tailed dunnart
Spermatocyte I	Late pachytene	2155	14.19	76	1.31579	Fat-tailed dunnart
Spermatocyte I	Late pachytene	2689.33	19.58	64	1.10803	Fat-tailed dunnart
Spermatocyte I	Late pachytene	6972.95	105.84	323	5.59211	Fat-tailed dunnart
Spermatocyte I	Late pachytene	5912.87	86.11	219	3.79155	Fat-tailed dunnart
Spermatocyte I	Late pachytene	17011.1	30.63	150	2.59695	Fat-tailed dunnart
Spermatocyte I	Late pachytene	4582.1	35.11	130	2.25069	Fat-tailed dunnart
Spermatocyte I	Late pachytene	3962.51	60.68	150	2.59695	Fat-tailed dunnart
Spermatocyte I	Late pachytene	3962.51	60.68	150	2.59695	Fat-tailed dunnart
Spermatocyte I	Late pachytene	4346.7	42.9	139	2.40651	Fat-tailed dunnart
Spermatocyte I	Late pachytene	5181.27	41.29	146	2.5277	Fat-tailed dunnart
Spermatocyte I	Late pachytene	3598.73	129.6	157	2.71814	Fat-tailed dunnart
Spermatocyte I	Late pachytene	7519.76	93.71	128	2.21607	Fat-tailed dunnart
Spermatocyte I	Late pachytene	6287.79	133.71	227	3.93006	Fat-tailed dunnart
Spermatocyte I	Late pachytene	4297.88	25.76	72	1.24654	Fat-tailed dunnart
Spermatocyte I	Late pachytene	4297.88	25.76	72	1.24654	Fat-tailed dunnart
Spermatocyte I	Late pachytene	2978.09	39.58	75	1.29848	Fat-tailed dunnart
Spermatocyte I	Late pachytene	4611.89	42.73	81	1.40235	Fat-tailed dunnart
Spermatocyte I	Late pachytene	4236.11	98.66	140	2.42382	Fat-tailed dunnart
Spermatocyte I	Late pachytene	7789.78	92.23	170	2.94321	Fat-tailed dunnart
Spermatocyte I	Late pachytene	11241.2	28.88	118	2.04294	Fat-tailed dunnart
Spermatocyte I	Late pachytene	7974.61	179.52	233	4.03393	Fat-tailed dunnart
Spermatocyte I	Late pachytene	3528.64	130.25	153	2.64889	Fat-tailed dunnart
Spermatocyte I	Late pachytene	10769.4	123.5	123.5	2.13816	Fat-tailed dunnart
Spermatocyte I	Late pachytene	6646.38	88.71	88.71	1.53584	Fat-tailed dunnart
Spermatocyte I	Late pachytene	12296.3	113.91	113.91	1.97213	Fat-tailed dunnart
Spermatocyte I	Late pachytene	8430.89	126.06	126.06	2.18248	Fat-tailed dunnart
Spermatocyte I	Late pachytene	6746.07	55.6	55.6	0.962604	Fat-tailed dunnart
Spermatocyte I	Late pachytene	9087.35	47.36	47.36	0.819945	Fat-tailed dunnart
Spermatocyte I	Late pachytene	5559.6	48.58	48.58	0.841066	Fat-tailed dunnart
Spermatocyte I	Late pachytene	25509.9	177.67	177.67	3.076	Fat-tailed dunnart
Spermatocyte I	Late pachytene	11191.2	75.66	75.66	1.3099	Fat-tailed dunnart
Spermatocyte I	Late pachytene	11256.9	93.52	93.52	1.61911	Fat-tailed dunnart
Spermatocyte I	Late pachytene	7444.7	54.73	54.73	0.947542	Fat-tailed dunnart
Spermatocyte I	Late pachytene	3722.35	27.365	27.365	0.473771	Fat-tailed dunnart
Spermatocyte I	Late pachytene	3722.35	27.365	27.365	0.473771	Fat-tailed dunnart
Spermatocyte I	Late pachytene	6762.74	28.02	99	1.71399	Fat-tailed dunnart
Spermatocyte I	Late pachytene	6557.16	30.16	133	2.30263	Fat-tailed dunnart
Spermatocyte I	Late pachytene	10247.3	126.51	253	4.38019	Fat-tailed dunnart
Spermatocyte I	Late pachytene	4425.11	29.35	62	1.07341	Fat-tailed dunnart
Spermatocyte I	Late pachytene	7594.45	141.03	211	3.65305	Fat-tailed dunnart
Spermatocyte I	Late pachytene	6868.13	117.35	189	3.27216	Fat-tailed dunnart
Spermatocyte I	Late pachytene	4470.53	52.38	134	2.31994	Fat-tailed dunnart
Spermatocyte I	Late pachytene	9183.08	115.34	284	4.9169	Fat-tailed dunnart
Spermatocyte I	Late pachytene	12707.5	99.74	345	5.97299	Fat-tailed dunnart
Spermatocyte I	Late pachytene	4850.21	52.75	173	2.99515	Fat-tailed dunnart
Spermatocyte I	Late pachytene	12846	111.48	77	1.3331	Fat-tailed dunnart
Spermatocyte I	Late pachytene	4540.38	120.42	123	2.1295	Fat-tailed dunnart
Spermatocyte I	Late pachytene	3370.14	40.31	119	2.06025	Fat-tailed dunnart
Spermatocyte I	Late pachytene	11116.2	86.26	268	4.63989	Fat-tailed dunnart
Spermatocyte I	Late pachytene	13554.5	76.56	187	3.23753	Fat-tailed dunnart
Spermatocyte I	Late pachytene	5572.25	163.93	267	4.62258	Fat-tailed dunnart
Spermatocyte I	Late pachytene	6048.71	91.97	148	2.56233	Fat-tailed dunnart
Spermatocyte I	Late pachytene	5735.65	130.9	292	5.0554	Fat-tailed dunnart
Spermatocyte I	Late pachytene	6234.73	104.53	223	3.8608	Fat-tailed dunnart
Spermatocyte I	Late pachytene	9511.94	167.37	218	3.77424	Fat-tailed dunnart
Spermatocyte I	Late pachytene	10640	107.95	247	4.27632	Fat-tailed dunnart
Spermatocyte I	Late pachytene	10379.2	262.59	353	6.1115	Fat-tailed dunnart
Spermatocyte I	Late pachytene	26824.8	116.87	440	7.61773	Fat-tailed dunnart
Spermatocyte I	Late pachytene	4096.39	87.17	125	2.16413	Fat-tailed dunnart
Spermatocyte I	Late pachytene	5874.28	111.43	208	3.60111	Fat-tailed dunnart
Spermatocyte I	Late pachytene	9799.39	244.32	378	6.54432	Fat-tailed dunnart
Spermatocyte I	Late pachytene	21003.3	271.7	521	9.02008	Fat-tailed dunnart
Spermatocyte I	Late pachytene	8783.16	29.18	81	1.40235	Fat-tailed dunnart
Spermatocyte I	Late pachytene	6199.92	54.96	91	1.57548	Fat-tailed dunnart
Spermatocyte I	Late pachytene	12949.6	69.09	144	2.49307	Fat-tailed dunnart
Spermatocyte I	Late pachytene	13140.1	89.92	210	3.63573	Fat-tailed dunnart
Spermatocyte I	Late pachytene	11638.6	100.21	192	3.3241	Fat-tailed dunnart
Spermatocyte I	Late pachytene	3578.26	86.265	95.5	1.65339	Fat-tailed dunnart
Spermatocyte I	Late pachytene	3578.26	86.265	95.5	1.65339	Fat-tailed dunnart
Spermatocyte I	Late pachytene	8641.04	142.49	172	2.97784	Fat-tailed dunnart
Spermatocyte I	Late pachytene	4016.67	106	144	2.49307	Fat-tailed dunnart
Spermatocyte I	Late pachytene	2886.38	109.13	160	2.77008	Fat-tailed dunnart
Spermatocyte I	Late pachytene	16980.5	142.37	358	6.19806	Fat-tailed dunnart
Spermatocyte I	Late pachytene	9176.73	98.65	138	2.3892	Fat-tailed dunnart
[truncated: 10,279 more rows]

## Sheet: Fig 7F
Data from Fig 7F: Heterologous telomeric interaction events per cell in the fat-tailed dunnart during the meiotic prophase I
	0	1	2	≥ 3
Zygotene	23	4	6	1
Early pachytene	3	7	9	9
Late pachytene	11	6	17	8

## Sheet: Fig S5F
Data from Fig S5F: Asynapsed telomere events per cell in the fat-tailed dunnart during the meiotic prophase I
	0	1-2
Late zygotene	54	4
Early pachytene	64	6
Late pachytene	60	6
